# Supplementary material
Source: PubMed Central journal article supplement (PMC4111264)

SUPPORTING INFORMATION

for

**Biomimetic Aerobic C–H Olefination of Cyclic Enaminones at Room Temperature:  
Development toward the Synthesis of 1,3,5-Trisubstituted Benzenes**

Yi-Yun Yu and Gunda I. Georg\*

*Department of Chemistry and Department of Medicinal Chemistry and  
the Institute for Therapeutics Discovery and Development, University of Minnesota  
717 Delaware Street SE, Minneapolis, Minnesota 55414 USA*

**Table of Contents**

|                                                                         |         |
|-------------------------------------------------------------------------|---------|
| 1. Preparation of the starting materials                                | S2      |
| 2. Optimization data for the aerobic dehydrogenative alkenylation       | S3–S6   |
| 3. Condition optimization for the Diels-Alder tandem reaction           | S6–S7   |
| 4. Mechanistic study of the Diels-Alder tandem reaction                 | S7–S9   |
| 5. References                                                           | S8      |
| 6. <sup>1</sup> H NMR and <sup>13</sup> C NMR spectra for new compounds | S10–S40 |

## 1. Preparation of the starting materials

### 1) Preparation of *N*-benzyl-2-isopropyl-2,3-dihydropyridin-4(1*H*)-one

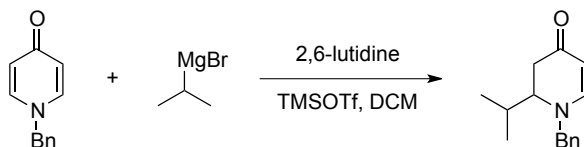

*N*-Benzyl-4-pyridone (3.0 g, 16.20 mmol) in dry CH<sub>2</sub>Cl<sub>2</sub> (30 mL) was treated with TMSOTf (6.3 mL, 32.39 mmol) at room temperature under a N<sub>2</sub> atmosphere. After the reaction was stirred for 1 h, 2,6-lutidine (3.8 mL, 32.39 mmol) was added, followed by slow addition of a 2.0 M solution of isopropylmagnesium bromide in THF (12.2 mL, 24.29 mmol) with a syringe pump. The reaction was stirred for another 2 h and then quenched with saturated NH<sub>4</sub>Cl (15 mL). The mixture was extracted with CH<sub>2</sub>Cl<sub>2</sub> (15 mL × 4). The combined organic layers were dried over Na<sub>2</sub>SO<sub>4</sub>, filtered, and concentrated under reduced pressure. Further purification was carried out by flash column chromatography (3:1 EtOAc/hexanes) to produce 2.1 g (57%) of *N*-benzyl-2-isopropyl-2,3-dihydropyridin-4(1*H*)-one as an orange oil. <sup>1</sup>H NMR (400 MHz, CDCl<sub>3</sub>) δ 7.41–7.30 (m, 3H), 7.29–7.24 (m, 2H), 7.12 (d, *J* = 7.4 Hz, 1H), 4.91 (d, *J* = 7.4 Hz, 1H), 4.47 (d, *J* = 15.4 Hz, 1H), 4.39 (d, *J* = 15.4 Hz, 1H), 3.22 (td, *J* = 6.9, 4.0 Hz, 1H), 2.60 (dd, *J* = 16.7, 7.5 Hz, 1H), 2.39 (dd, *J* = 16.7, 3.8 Hz, 1H), 2.28 (dq, *J* = 13.4, 6.7 Hz, 1H), 0.95 (d, *J* = 6.8 Hz, 6H); <sup>13</sup>C NMR (100 MHz, CDCl<sub>3</sub>) δ 191.3, 153.7, 137.0, 129.2, 128.4, 127.4, 97.5, 61.4, 58.8, 36.5, 29.1, 19.8, 18.1; FTIR (Film, cm<sup>-1</sup>) 3054, 2984, 2876, 1635, 1591, 1496, 1455, 1441, 1421, 1387, 1357, 1344, 1204, 1166, 1094, 1077, 1029, 1014, 1002, 955, 896; HRMS (ESI+) *m/z* calculated for [M+Na]<sup>+</sup> C<sub>15</sub>H<sub>19</sub>NONa: 252.1359, found 252.1354.

### 2) Synthesis of other cyclic enaminones

Other cyclic enaminones were prepared according to the reported procedures as follows (Scheme S1): **S1**,<sup>[1]</sup> **S2**,<sup>[2]</sup> **S3**,<sup>[3]</sup> **S4**,<sup>[4]</sup> **S5**,<sup>[4]</sup> **S6**,<sup>[2]</sup> **S7**,<sup>[5]</sup> **S8**.<sup>[6]</sup>

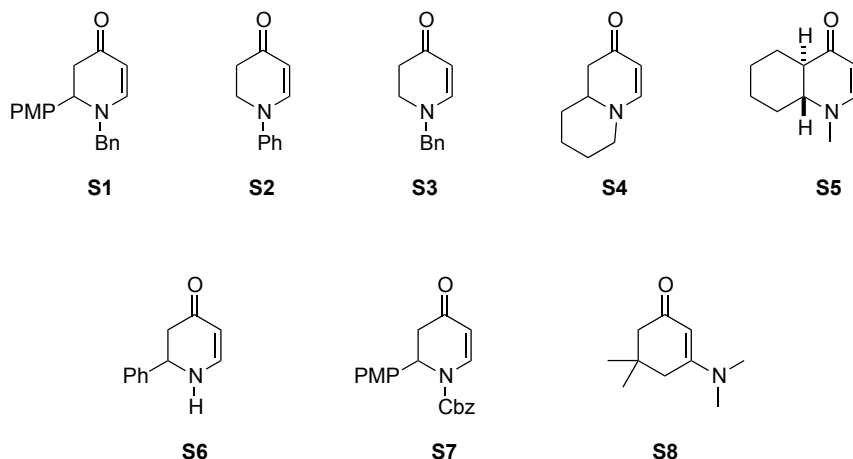

**Scheme S1.** Preparation of cyclic enaminones.

## 2. Optimization data for the aerobic dehydrogenative alkenylation

### 1) Initial trials

**Table S1.** Initial attempts of aerobic oxidative alkenylation of cyclic enaminones

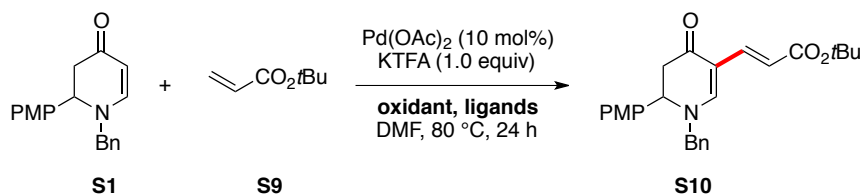

| Entry <sup>a</sup> | Cu <sup>II</sup> (0.2) | Oxidant <sup>b</sup> | Ligand (0.2) | % Consumption <sup>c</sup> | % Yield <sup>d</sup> |
|--------------------|------------------------|----------------------|--------------|----------------------------|----------------------|
| 1                  | –                      | air                  | –            | 50                         | 27                   |
| 2                  | –                      | O <sub>2</sub>       | –            | 71                         | 44                   |
| 3                  | Cu(OAc) <sub>2</sub>   | O <sub>2</sub>       | –            | 91                         | 41                   |
| 4                  | –                      | O <sub>2</sub>       | Boc-β-Ala-OH | 85                         | 49                   |
| 5                  | –                      | O <sub>2</sub>       | Boc-Phe-OH   | 76                         | 45                   |

<sup>a</sup> Other conditions: **S1** (0.2 M), **S9** (2 equiv), Pd(OAc)<sub>2</sub> (10 mol %), KTFA (1 equiv) in DMF (0.5 mL) at 80 °C through 24 h. <sup>b</sup> The pressure was 1 atm. <sup>c</sup> NMR % conversion of the starting enaminone with Ph<sub>3</sub>SiMe (1.0 equiv) as the internal standard. <sup>d</sup> NMR % yield with Ph<sub>3</sub>SiMe (1.0 equiv) as the internal standard.

### 2) Introduction of catechol

**Table S2.** Aerobic oxidative alkenylation of cyclic enaminones with catechol

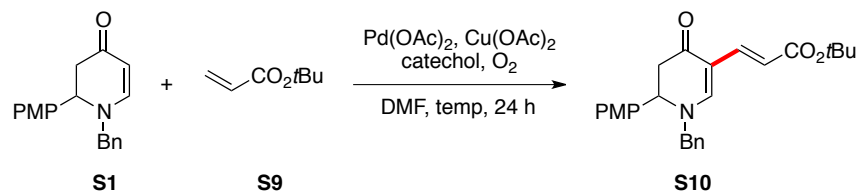

| Entry <sup>a</sup> | Pd(OAc) <sub>2</sub> (mol %) | Cu(OAc) <sub>2</sub> (mol %) | Catechol (mol %) | Oxidant (1 atm) | Temp (°C) | % Consumption <sup>b</sup> | % Yield <sup>c</sup> |
|--------------------|------------------------------|------------------------------|------------------|-----------------|-----------|----------------------------|----------------------|
| 1                  | 5                            | 5                            | 10               | O <sub>2</sub>  | 80        | 69                         | 40                   |
| 2                  | 5                            | 5                            | 10               | O <sub>2</sub>  | rt        | 49                         | 36                   |
| 3                  | 5                            | 10                           | 20               | O <sub>2</sub>  | rt        | 47                         | 47                   |
| 4                  | 10                           | 10                           | 20               | O <sub>2</sub>  | rt        | <b>85</b>                  | <b>78</b>            |
| 5                  | 5                            | 10                           | 20               | air             | rt        | 49                         | 44                   |
| 6                  | 10                           | 10                           | 20               | air             | rt        | 79                         | 72                   |
| 7                  | 10                           | 10                           | 10               | O <sub>2</sub>  | rt        | 78                         | 72                   |
| 8                  | 10                           | 20                           | 40               | O <sub>2</sub>  | rt        | 77                         | 69                   |

<sup>a</sup> Other conditions: **S1** (0.2 M), **S9** (4 equiv) in DMF (0.5 mL) through 24 h. <sup>b</sup> NMR % conversion of the starting enaminone with Ph<sub>3</sub>SiMe (1.0 equiv) as the internal standard. <sup>c</sup> NMR % yield with Ph<sub>3</sub>SiMe (1.0 equiv) as the internal standard.

### 3) Solvent screen

**Table S3.** Solvent effect on the aerobic oxidative alkenylation of cyclic enaminones

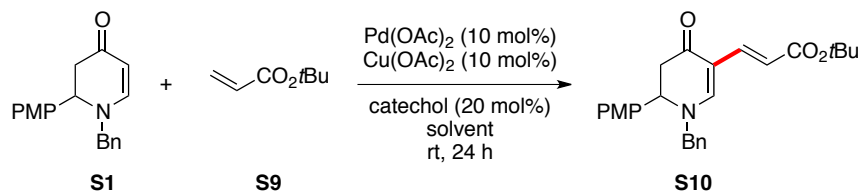

| Entry <sup>a</sup> | Solvent | % Consumption <sup>b</sup> | % Yield <sup>c</sup> |
|--------------------|---------|----------------------------|----------------------|
| 1                  | DMF     | <b>85</b>                  | <b>78</b>            |
| 2                  | MeCN    | 73                         | 65                   |
| 3                  | DMSO    | 70                         | 62                   |
| 4                  | NMP     | 51                         | 43                   |
| 5                  | THF     | 42                         | 39                   |
| 6                  | toluene | 65                         | 57                   |

<sup>a</sup> Other conditions: **S1** (0.2 M), **S9** (4 equiv), Pd(OAc)<sub>2</sub> (10 mol %), Cu(OAc)<sub>2</sub> (10 mol %), catechol (20 mol %) in DMF (0.5 mL) at rt under O<sub>2</sub> (1 atm) through 24 h. <sup>b</sup> NMR % conversion of the starting enaminone with Ph<sub>3</sub>SiMe (1.0 equiv) as the internal standard. <sup>c</sup> NMR % yield with Ph<sub>3</sub>SiMe (1.0 equiv) as the internal standard.

### 4) Alkene concentration

**Table S4.** Alkene concentration on the aerobic oxidative alkenylation of cyclic enaminones

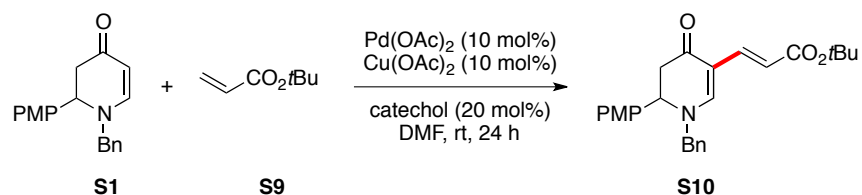

| Entry <sup>a</sup> | <b>S9</b> (equiv) | % Consumption <sup>b</sup> | % Yield <sup>c</sup> |
|--------------------|-------------------|----------------------------|----------------------|
| 1                  | 1.0               | 59                         | 57                   |
| 2                  | 2.0               | 72                         | 69                   |
| 3                  | 3.0               | 69                         | 62                   |
| 4                  | 4.0               | <b>85</b>                  | <b>78</b>            |
| 5                  | 5.0               | 77                         | 74                   |
| 6                  | 6.0               | 82                         | 74                   |
| 7                  | 8.0               | 77                         | 77                   |

<sup>a</sup> Other conditions: **S1** (0.2 M), Pd(OAc)<sub>2</sub> (10 mol %), Cu(OAc)<sub>2</sub> (10 mol %), catechol (20 mol %) in DMF (0.5 mL) at rt under O<sub>2</sub> (1 atm) through 24 h. <sup>b</sup> NMR % conversion of the starting enaminone with Ph<sub>3</sub>SiMe (1.0 equiv) as the internal standard. <sup>c</sup> NMR % yield with Ph<sub>3</sub>SiMe (1.0 equiv) as the internal standard.

## 5) Catalyst combination

**Table S5.** Catalyst screen for the aerobic oxidative alkenylation of cyclic enaminones

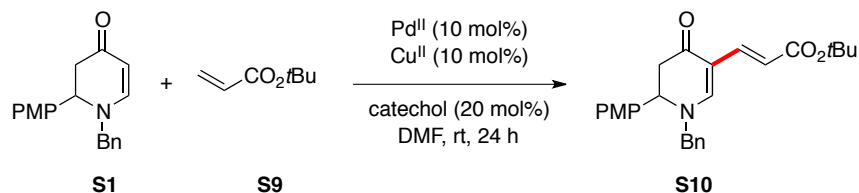

| Entry <sup>a</sup> | Pd <sup>II</sup> (10 mol %) | Cu <sup>II</sup> (10 mol %) | % Consumption <sup>b</sup> | % Yield <sup>c</sup> |
|--------------------|-----------------------------|-----------------------------|----------------------------|----------------------|
| 1                  | Pd(OAc) <sub>2</sub>        | Cu(OAc) <sub>2</sub>        | 85                         | 78                   |
| 2                  | Pd(TFA) <sub>2</sub>        | Cu(TFA) <sub>2</sub>        | 73                         | 63                   |
| 3                  | PdCl <sub>2</sub>           | CuCl <sub>2</sub>           | 53                         | 55                   |
| 4                  | Pd(TFA) <sub>2</sub>        | Cu(OAc) <sub>2</sub>        | <b>90</b>                  | <b>81</b>            |
| 5                  | Pd(OAc) <sub>2</sub>        | Cu(TFA) <sub>2</sub>        | 86                         | 81                   |
| 6                  | PdCl <sub>2</sub>           | Cu(OAc) <sub>2</sub>        | 61                         | 57                   |
| 7                  | Pd(OAc) <sub>2</sub>        | CuCl <sub>2</sub>           | 48                         | 37                   |
| 8                  | PdCl <sub>2</sub>           | Cu(TFA) <sub>2</sub>        | 43                         | 33                   |
| 9                  | Pd(TFA) <sub>2</sub>        | CuCl <sub>2</sub>           | 38                         | 27                   |

<sup>a</sup> Other conditions: **S1** (0.2 M), **S9** (4 equiv), catechol (20 mol %) in DMF (0.5 mL) at rt under O<sub>2</sub> (1 atm) through 24 h. <sup>b</sup> NMR % conversion of the starting enaminone with Ph<sub>3</sub>SiMe (1.0 equiv) as the internal standard. <sup>c</sup> NMR % yield with Ph<sub>3</sub>SiMe (1.0 equiv) as the internal standard.

## 6) Additional optimization

**Table S6.** Further study on the aerobic oxidative alkenylation of cyclic enaminones

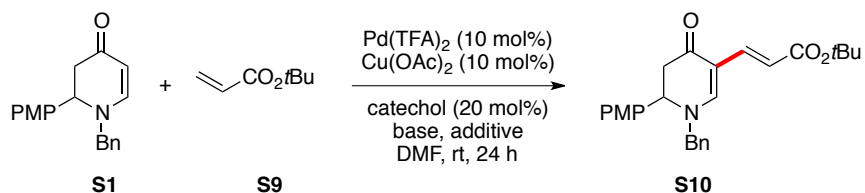

| Entry <sup>a</sup> | <b>S1</b> (M) | Base (0.2 equiv)                | Additive | % Consumption <sup>b</sup> | % Yield <sup>c</sup> |
|--------------------|---------------|---------------------------------|----------|----------------------------|----------------------|
| 1                  | 0.2           | –                               | –        | 90                         | 81                   |
| 2                  | 0.2           | pyridine                        | –        | 20                         | 16                   |
| 3                  | 0.2           | Et <sub>3</sub> N               | –        | 52                         | 51                   |
| 4                  | 0.2           | Na <sub>2</sub> CO <sub>3</sub> | –        | 72                         | 69                   |
| 5                  | 0.2           | NaHCO <sub>3</sub>              | –        | 77                         | 73                   |
| 6                  | 0.4           | –                               | –        | 100                        | 86                   |
| 7                  | 0.1           | –                               | –        | 58                         | 43                   |

|    |      |   |       |            |                            |
|----|------|---|-------|------------|----------------------------|
| 8  | 0.05 | – | –     | 77         | 68                         |
| 9  | 0.03 | – | –     | 61         | 52                         |
| 10 | 0.2  | – | 4Å MS | <b>100</b> | <b>91 (89<sup>d</sup>)</b> |

<sup>a</sup> Other conditions: **S9** (4 equiv), Pd(TFA)<sub>2</sub> (10 mol %), Cu(OAc)<sub>2</sub> (10 mol %), catechol (20 mol %) in DMF (0.5 mL) at rt under O<sub>2</sub> (1 atm) through 24 h. <sup>b</sup> NMR % conversion of the starting enaminone with Ph<sub>3</sub>SiMe (1.0 equiv) as the internal standard. <sup>c</sup> NMR % yield with Ph<sub>3</sub>SiMe (1.0 equiv) as the internal standard. <sup>d</sup> Isolated yield.

### 3. Condition optimization for the Diels-Alder tandem reaction

#### 1) Solvent screen

**Table S7.** Solvent effect on the Diels-Alder tandem reaction

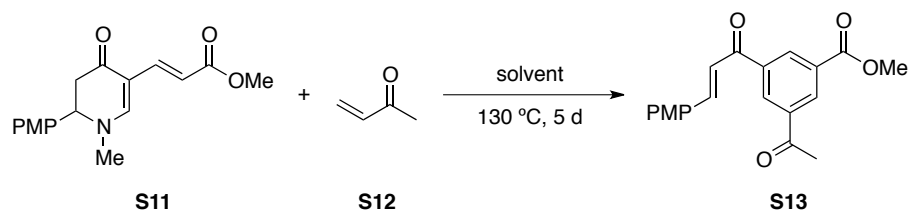

| Entry <sup>a</sup> | Solvent (1 mL) | % Yield |
|--------------------|----------------|---------|
| 1                  | toluene        | 44      |
| 2                  | DCE            | 45      |
| 3                  | MeCN           | 36      |
| 4                  | dioxane        | 35      |
| 5                  | DMAc           | 28      |
| 6                  | THF            | 0       |

<sup>a</sup> Conditions: Enaminone **S11** (0.07 M), alkene **S12** (2 equiv) at 130 °C for 5 d. <sup>1</sup>H NMR yield based on 1.0 equiv of Ph<sub>3</sub>SiMe as the internal standard.

#### 2) Reaction time and temperature

**Table S8.** Reaction time and temperature effect on the Diels-Alder tandem reaction

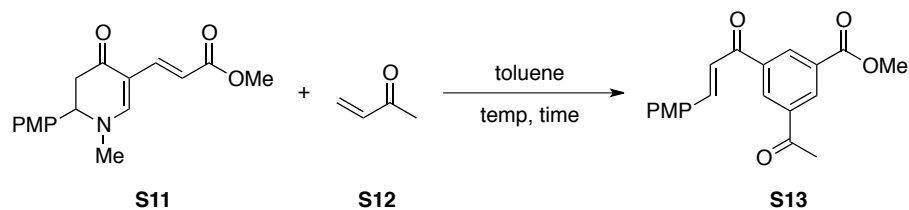

| Entry <sup>a</sup> | Time (h) | Temp (°C) | % Yield |
|--------------------|----------|-----------|---------|
| 1 <sup>b</sup>     | 0.5      | 180       | 17      |
| 2 <sup>b</sup>     | 2        | 180       | 44      |
| 3 <sup>b</sup>     | 4        | 180       | 48      |
| 4 <sup>b</sup>     | 8        | 180       | 51      |

|                |    |     |    |
|----------------|----|-----|----|
| 5 <sup>b</sup> | 10 | 180 | 52 |
| 6 <sup>b</sup> | 2  | 200 | 46 |
| 7 <sup>b</sup> | 4  | 200 | 19 |
| 8              | 24 | 150 | 31 |
| 9              | 24 | 160 | 56 |
| 10             | 24 | 170 | 40 |
| 11             | 24 | 180 | 45 |
| 12             | 15 | 180 | 43 |

<sup>a</sup> Conditions: Enaminone **S11** (0.07 M), alkene **S12** (4 equiv) in toluene (1 mL). <sup>1</sup>H NMR yield based on 1.0 equiv of Ph<sub>3</sub>SiMe as the internal standard. <sup>b</sup> Under microwave.

### 3) Stoichiometry

**Table S9.** Effect of reagent stoichiometry on the Diels-Alder tandem reaction

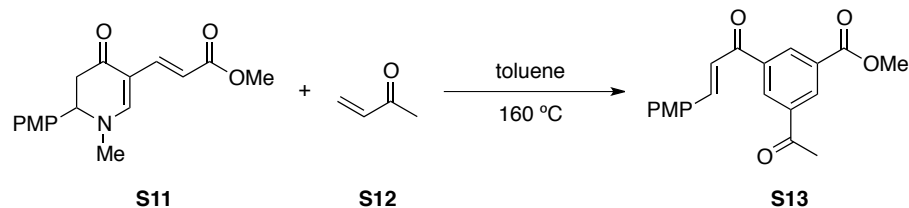

| Entry <sup>a</sup> | <b>S12</b> (equiv) | Time (h) | % Yield                    |
|--------------------|--------------------|----------|----------------------------|
| 1                  | 1.1                | 24       | 27                         |
| 2                  | 2.0                | 24       | 42                         |
| 3                  | 4.0                | 24       | 56                         |
| 4                  | 8.0                | 24       | <b>63 (66<sup>b</sup>)</b> |
| 5                  | 15.0               | 24       | 59                         |
| 6                  | 30.0               | 24       | 61                         |
| 7                  | 2.0                | 48       | 43                         |
| 8 <sup>c</sup>     | 2.0                | 24       | 17                         |

<sup>a</sup> Other conditions: Enaminone **S11** (0.07 M) in toluene (1 mL) at 160 °C. <sup>1</sup>H NMR yield based on 1.0 equiv of Ph<sub>3</sub>SiMe as the internal standard. <sup>b</sup> Isolated yield. <sup>c</sup> Under 1 atm O<sub>2</sub>.

### 4. Mechanistic study of the Diels-Alder tandem reaction

We proposed that methylamine was released during retro-Michael fragmentation in the Diels-Alder tandem sequence of synthesizing 1,3,5-trisubstituted benzenes. In order to support our hypothesis, diene **S11** (2.5 mg, 8.3 μmol) was treated with dienophile **S14** (6.0 μL, 66.4 μmol) in toluene (0.5 mL) at 160 °C for 15 h (Eq. 1). The crude mixture from the tandem reaction was initially subjected to a GC-MS analysis to detect methylamine. However, no methylamine was found.

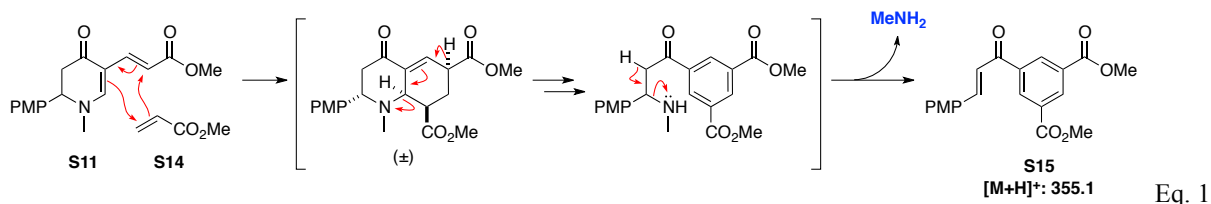

In light of the excess amount of dienophile in presence (*i.e.* 8.0 equiv of acrylate **S14**), we postulated that the release of a stoichiometric amount of methylamine could be readily trapped by acrylate **S14** to yield aza-Michael adducts **S16** and/or **S17** in Eq. 2.

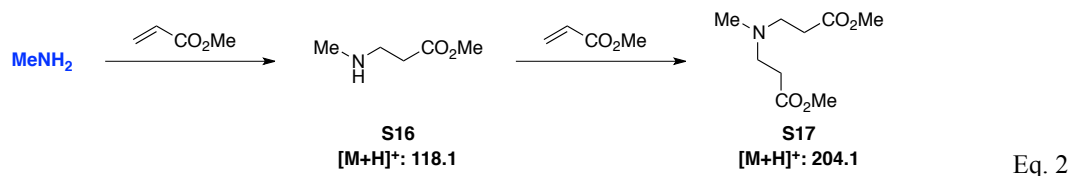

Hence, an LC-MS analysis was conducted on an Agilent LC-MSD ChemStation (Figure S1). An initial full MS scan of the crude mixture confirmed the product peak at  $m/z$  355.2 ( $[\mathbf{S15}+\mathbf{H}]^+$ , Figure S1-a). In addition, another prominent peak at  $m/z$  204.0 ( $[\mathbf{S17}+\mathbf{H}]^+$ ) was also detected corresponding to the aza-Michael adduct **S17** (Figure S1-a). No peak from the possible adduct **S16** was observed. To our delight, the LC-MS separation reconfirmed the two distinct peaks from **S17** (Figure S1-b, RT = 1.247 min) and **S15** (Figure S1-c, RT = 4.903 min) respectively, which provides strong evidence for our proposed mechanism. In fact, the fast scavenging of byproduct methylamine may be one driving force for the tandem reaction to proceed smoothly.

## 5. References

- [1] Y.-Y. Yu, M. J. Niphakis, G. I. Georg, *Org. Lett.* **2011**, *13*, 5932-5935.
- [2] M. J. Niphakis, B. J. Turunen, G. I. Georg, *J. Org. Chem.* **2010**, *75*, 6793-6805.
- [3] P. Guerry, R. Neier, *Synthesis* **1984**, *1984*, 485-488.
- [4] B. J. Turunen, G. I. Georg, *J. Am. Chem. Soc.* **2006**, *128*, 8702-8703.
- [5] R. Sebesta, M. G. Pizzuti, A. J. Boersma, A. J. Minnaard, B. L. Feringa, *Chem. Commun.* **2005**, 1711-1713.
- [6] C. J. Kowalski, K. W. Fields, *J. Org. Chem.* **1981**, *46*, 197-201.



**Figure S1.** LC-MS analysis of a Diels-Alder tandem reaction between **S11** and **S14**

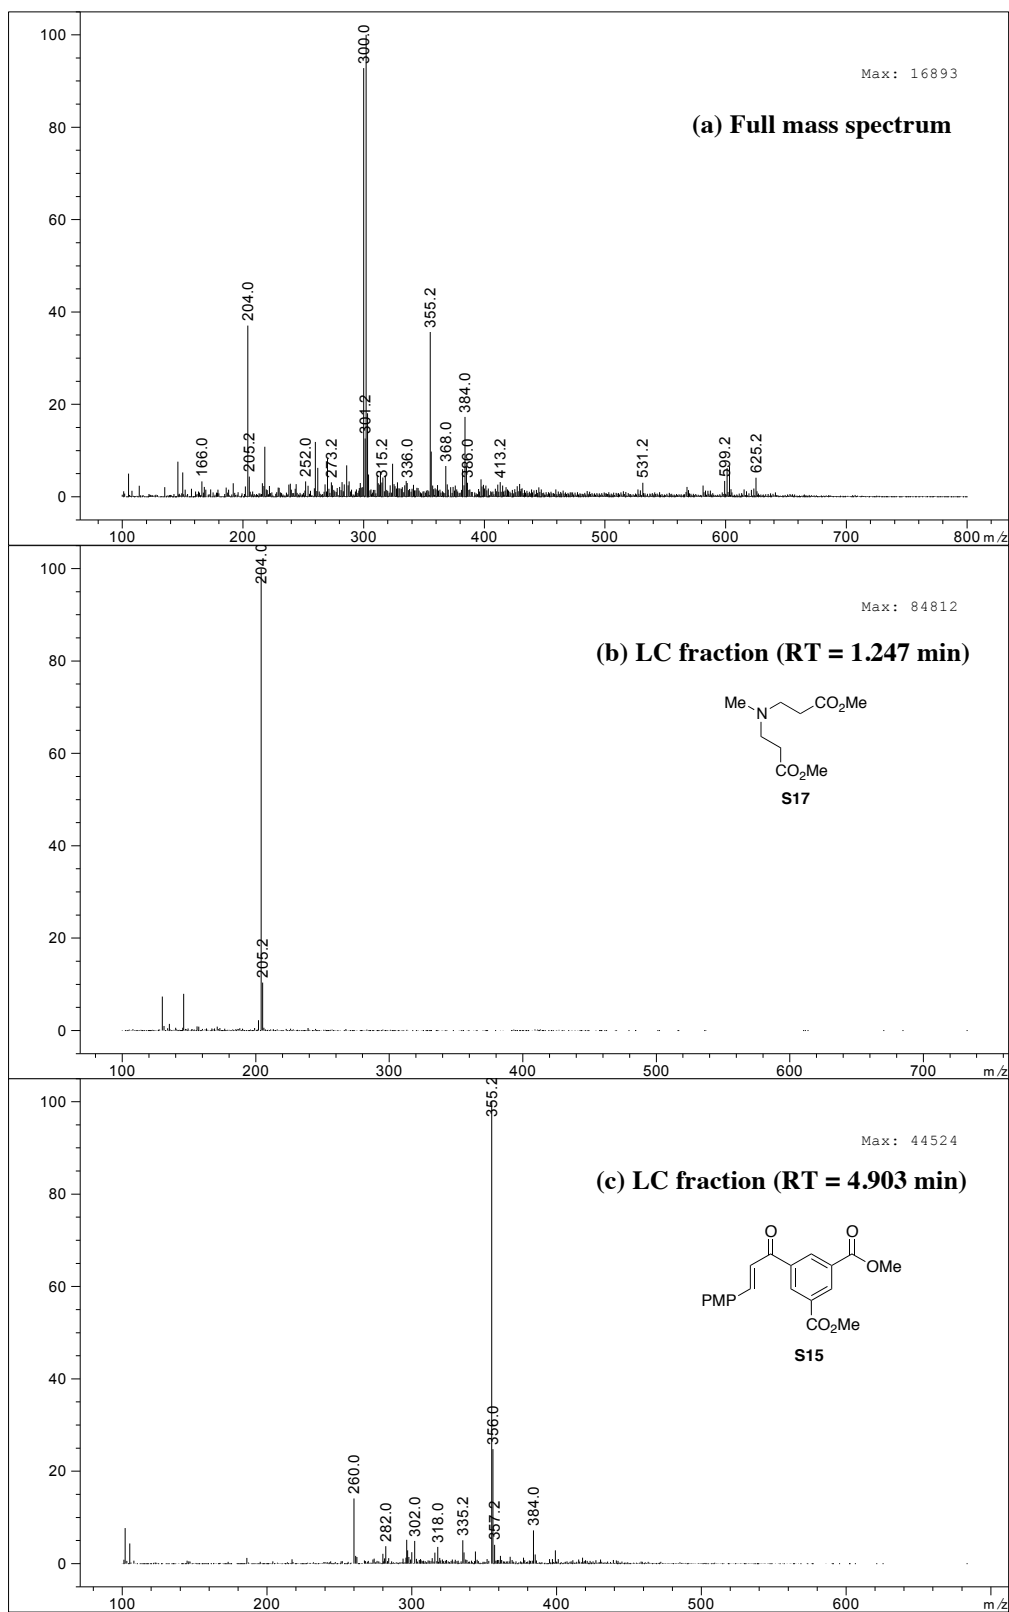

6. <sup>1</sup>H NMR and <sup>13</sup>C NMR spectra for new compounds

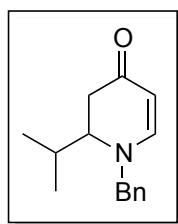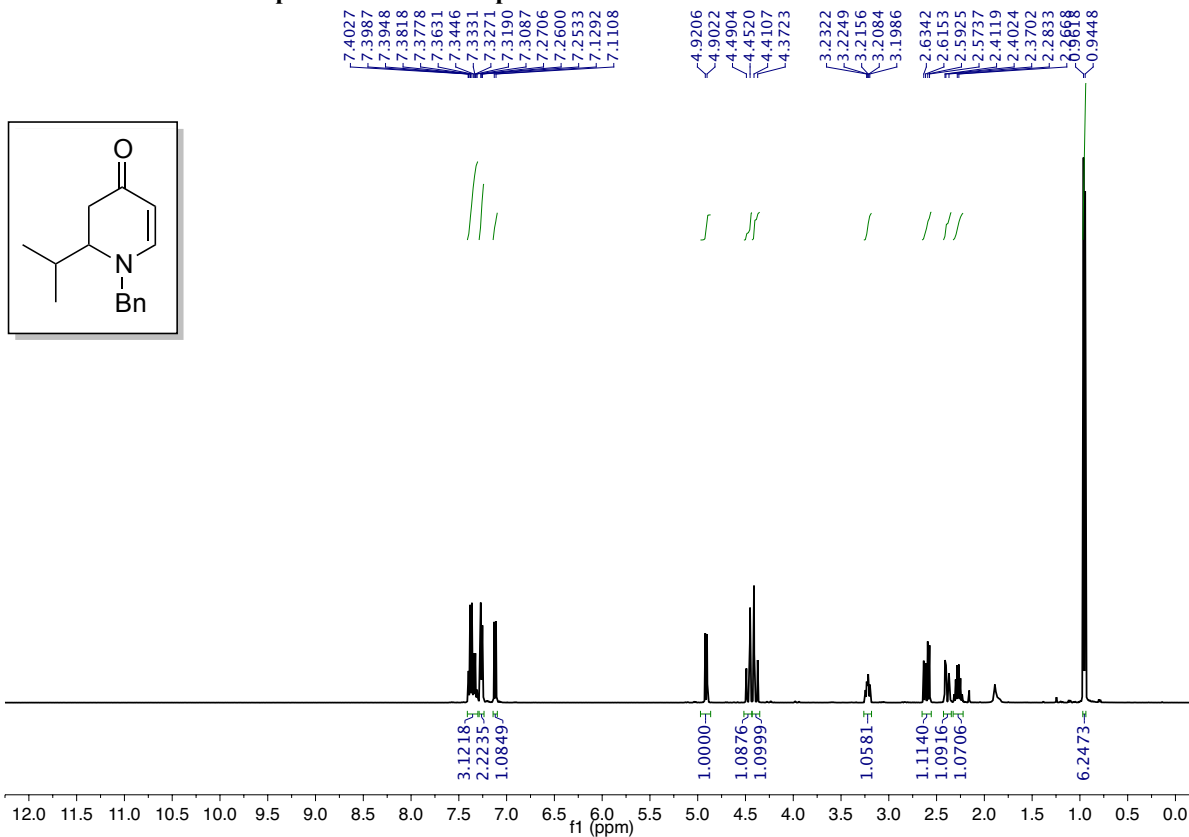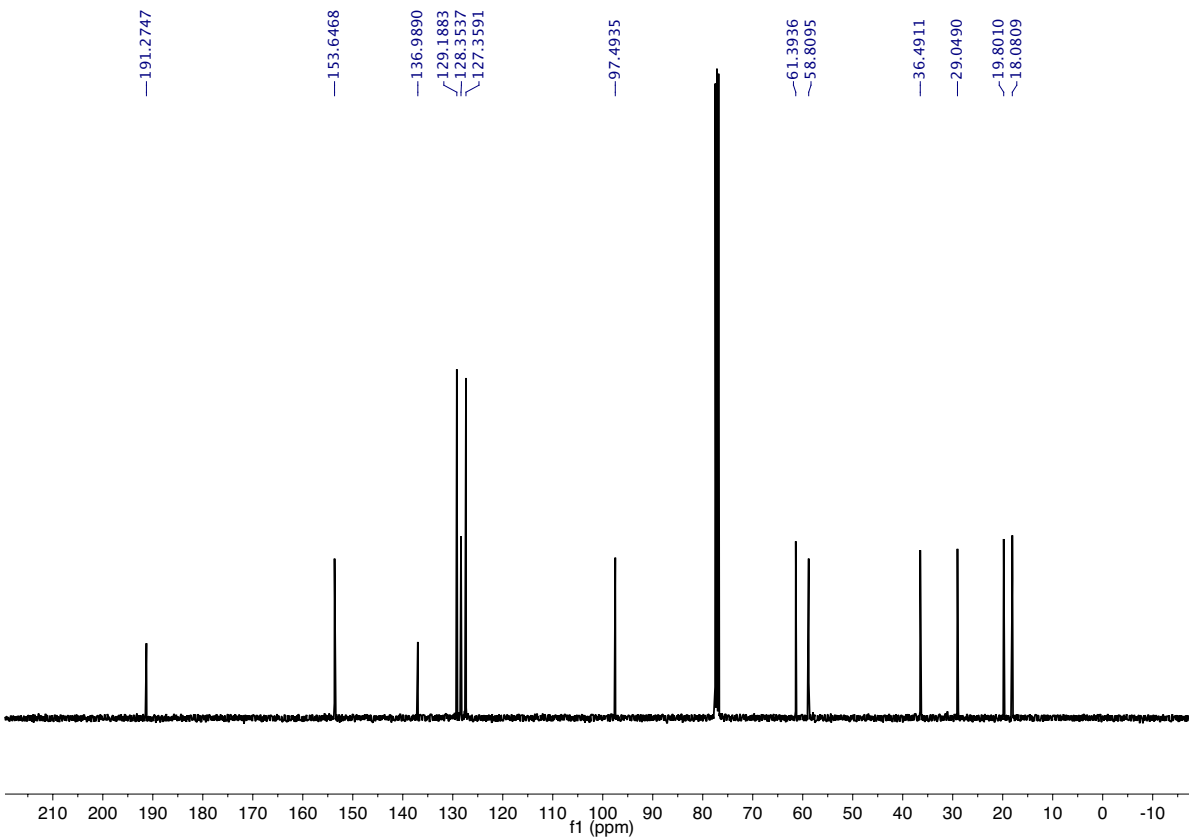

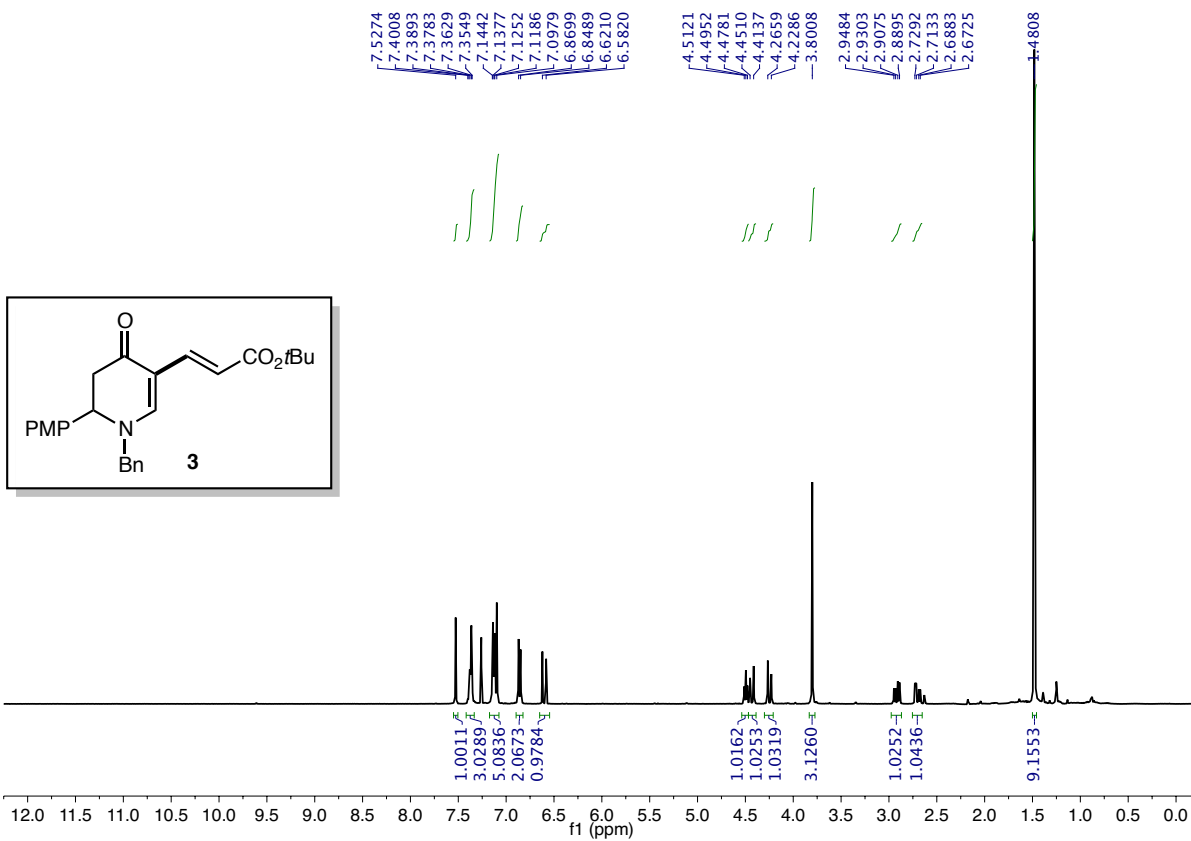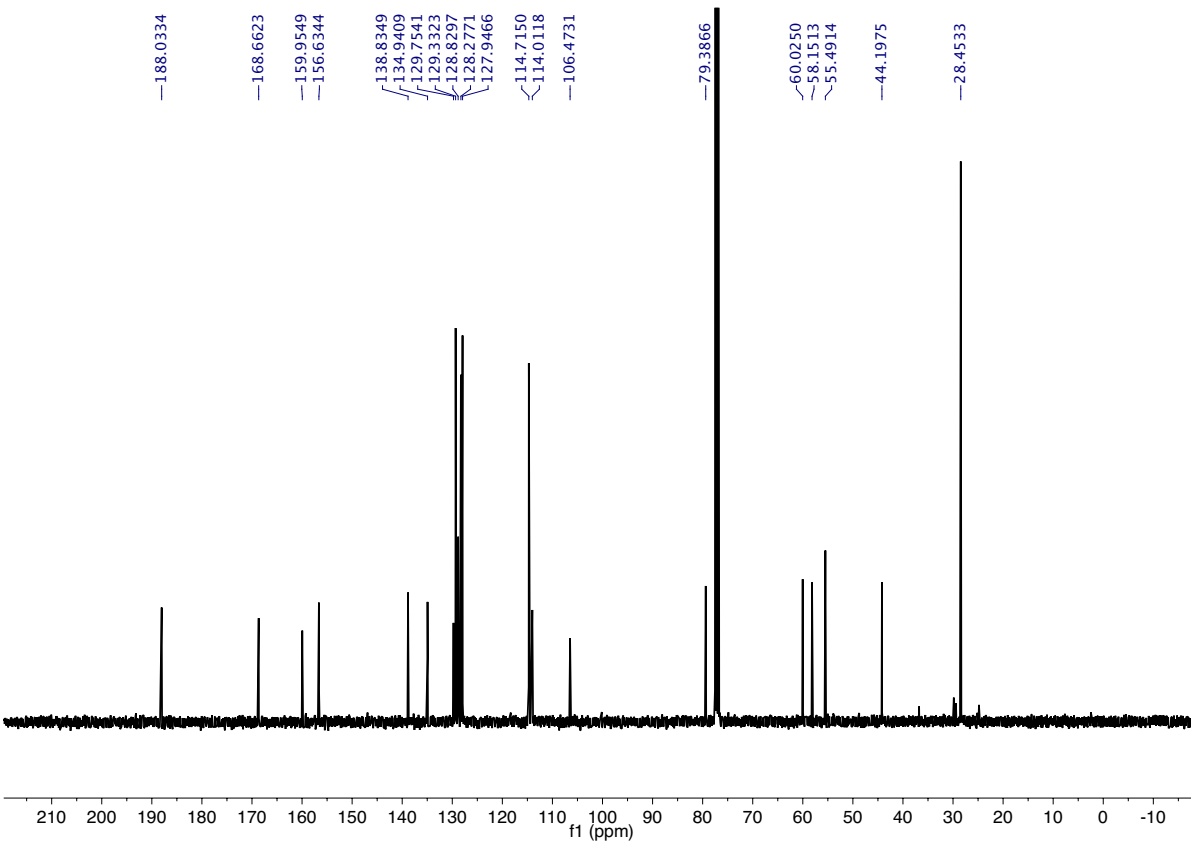

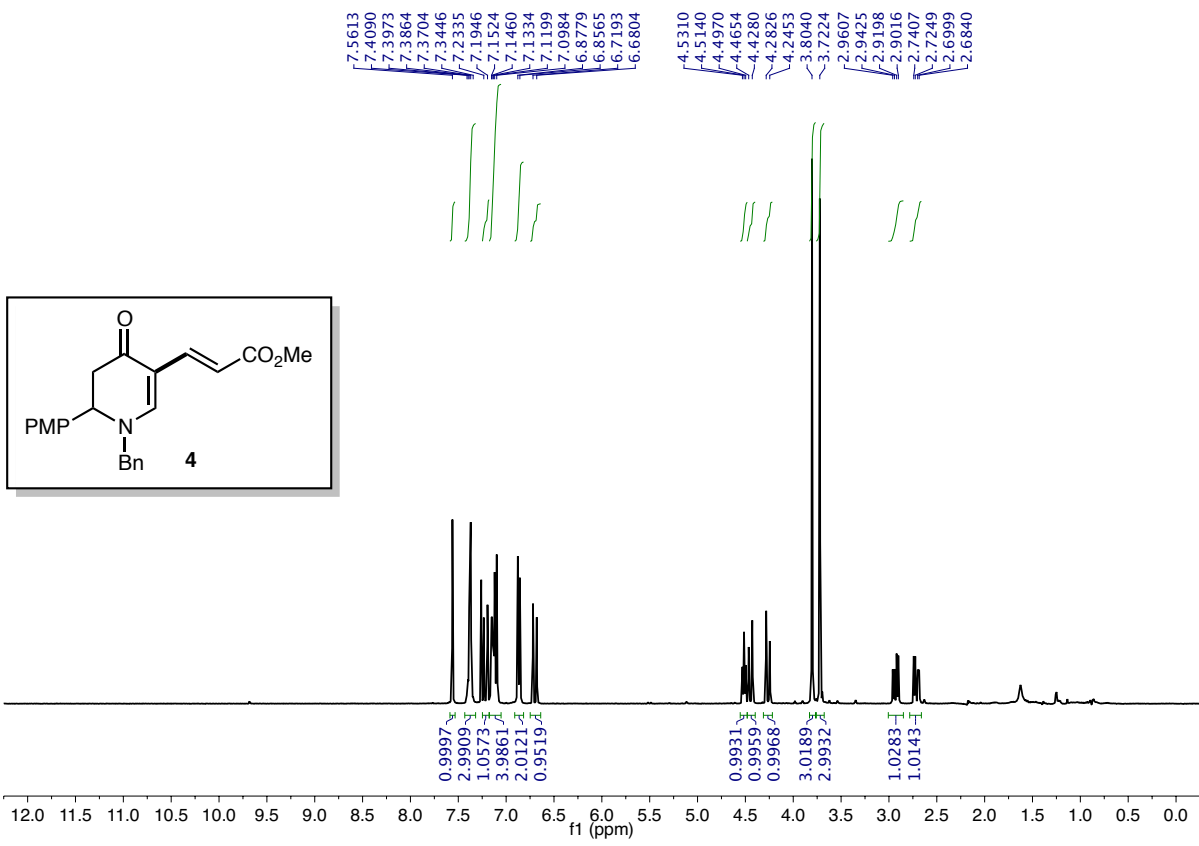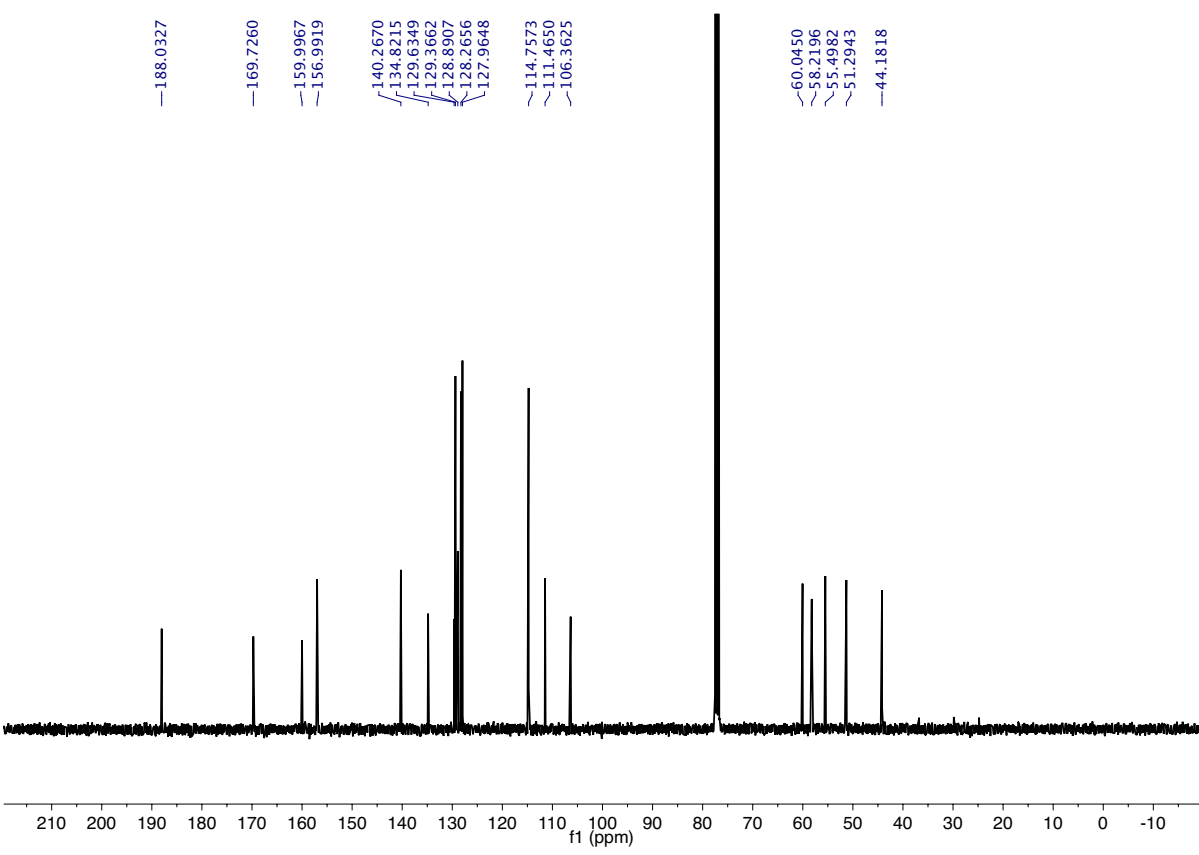

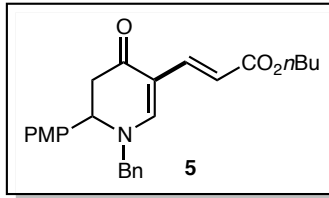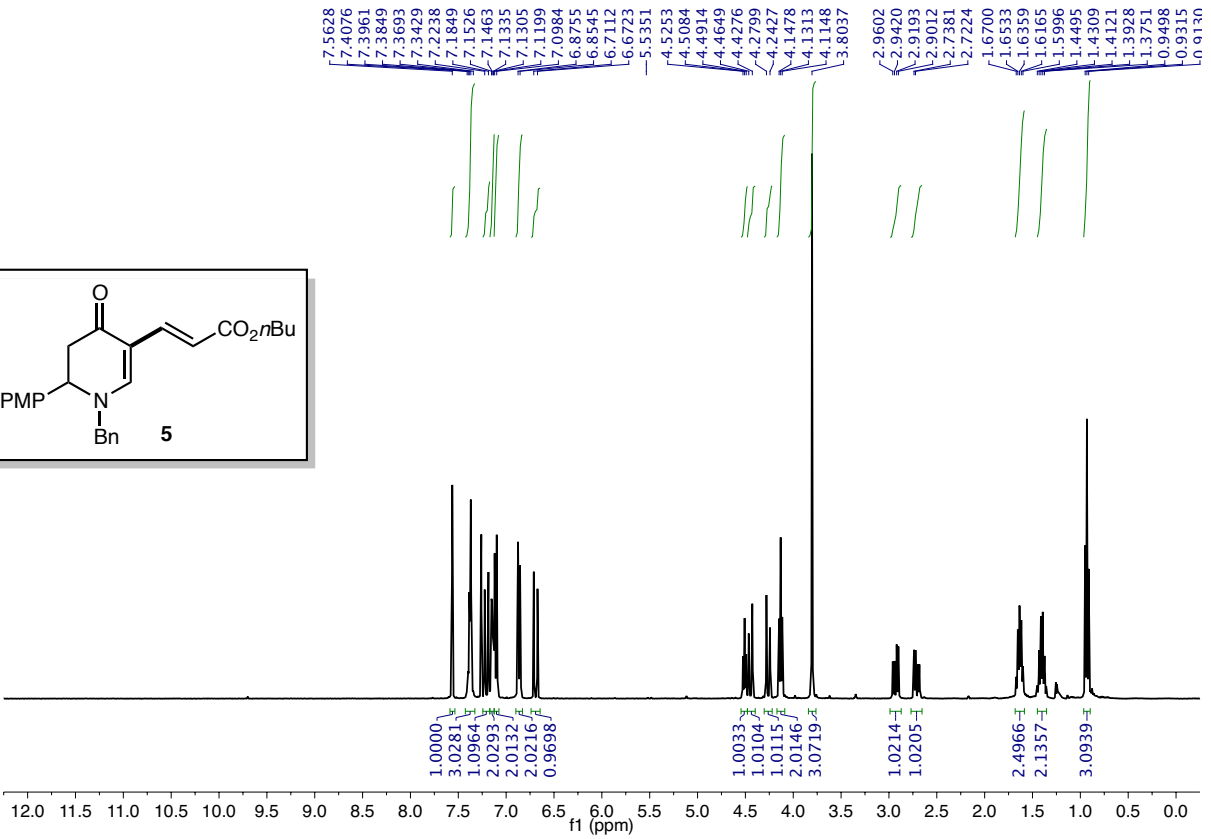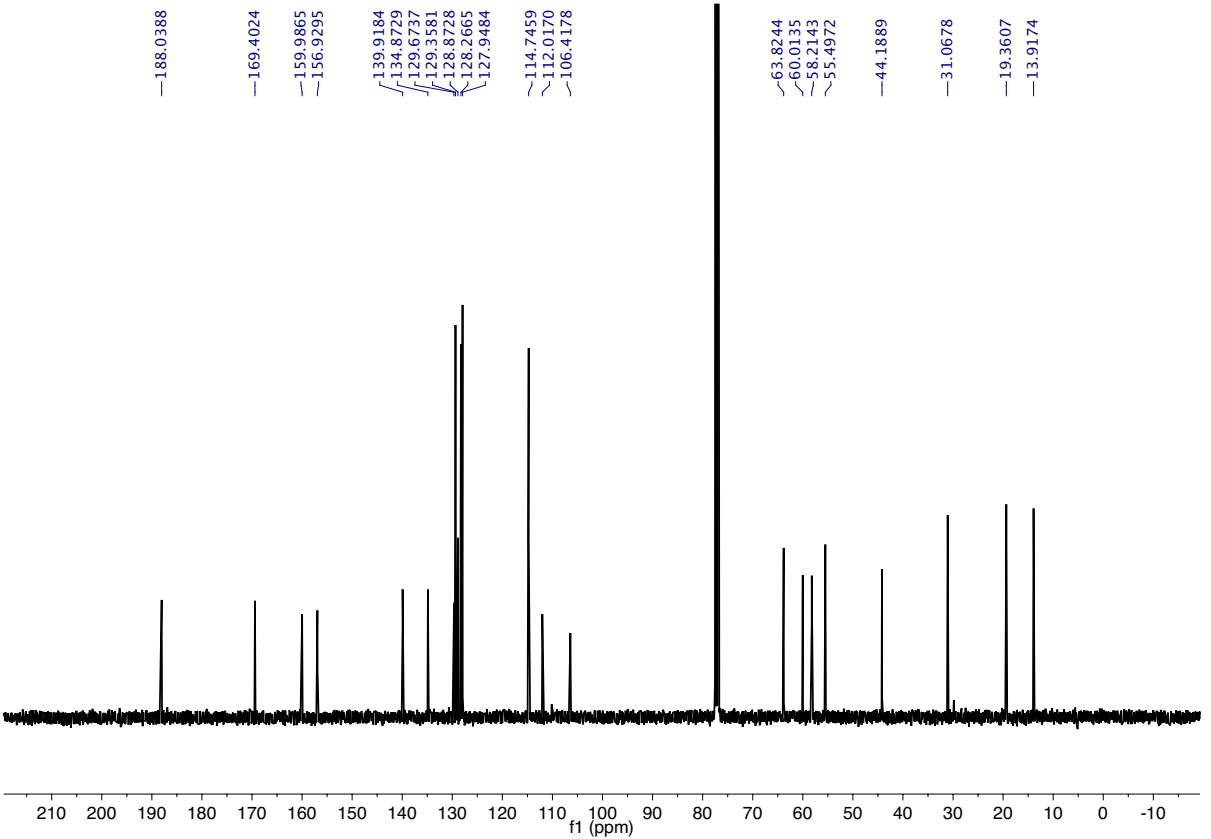

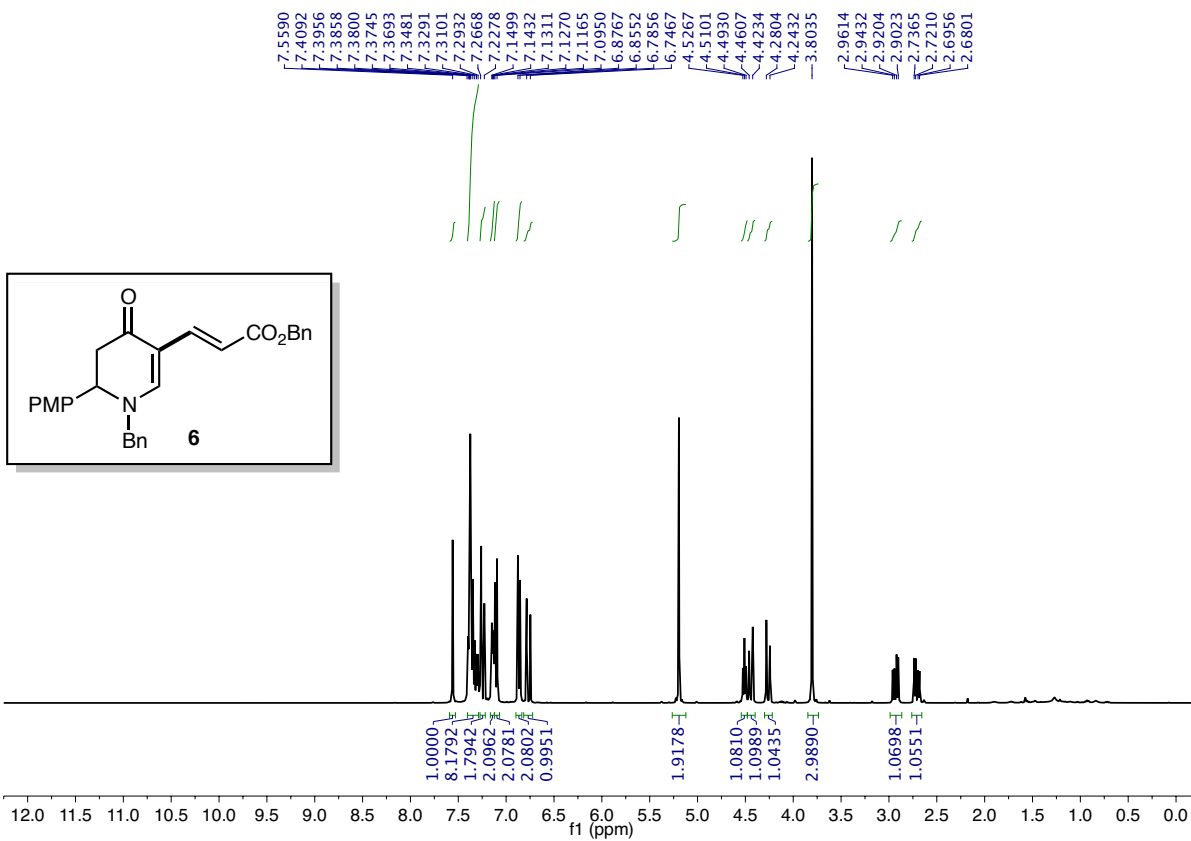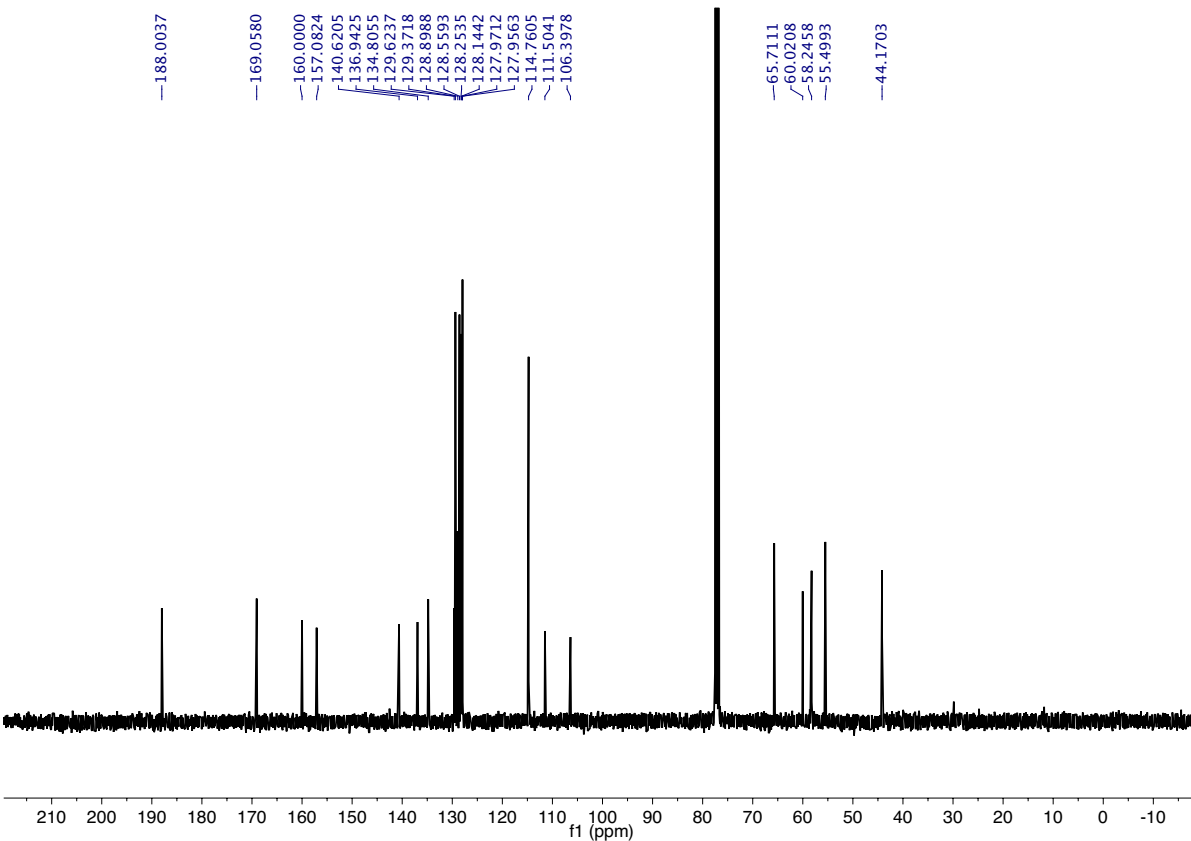

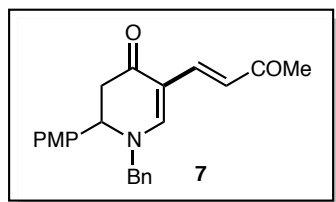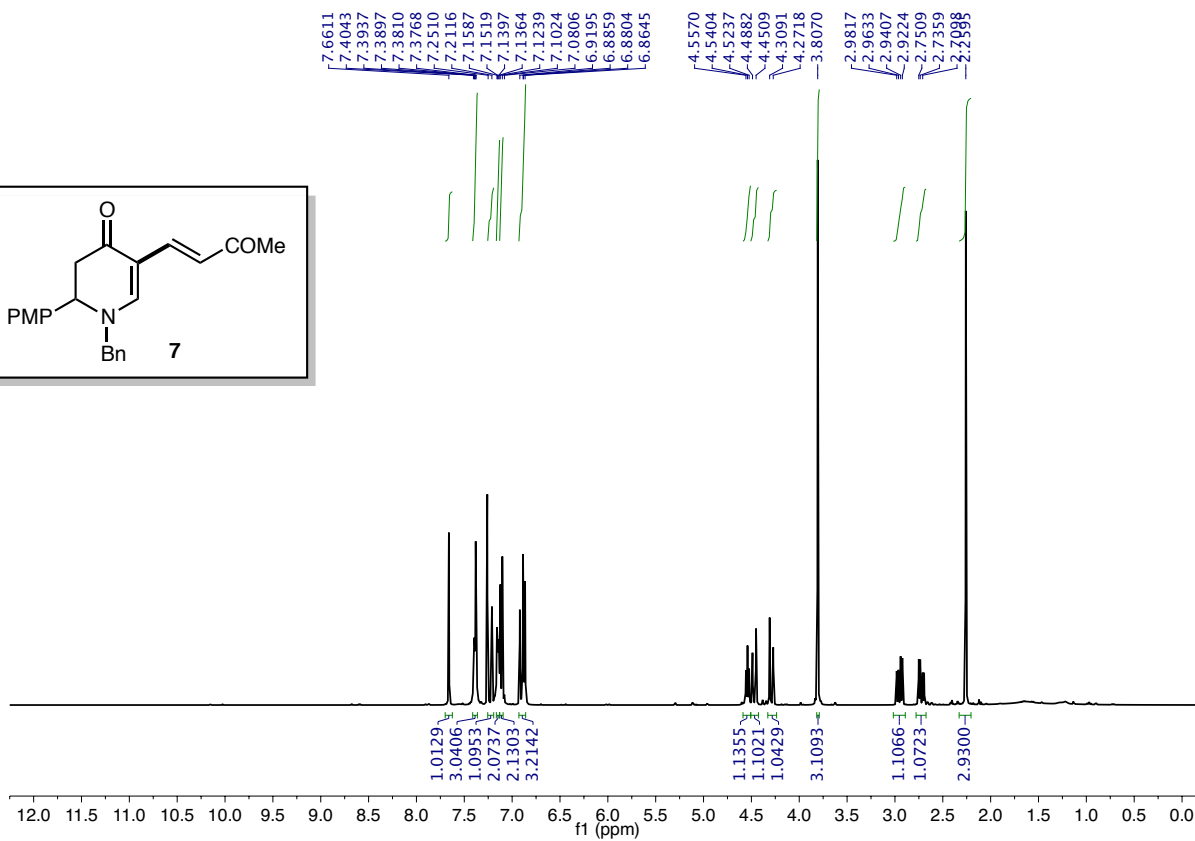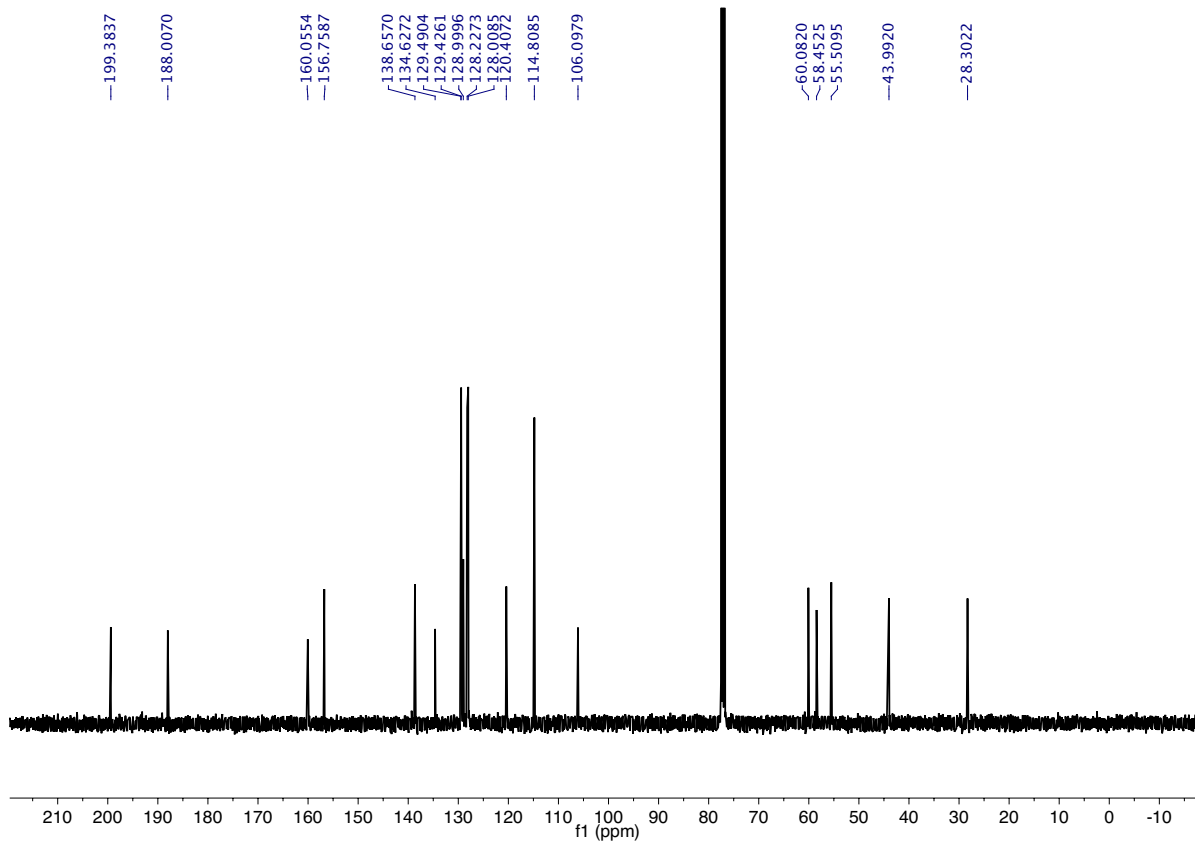

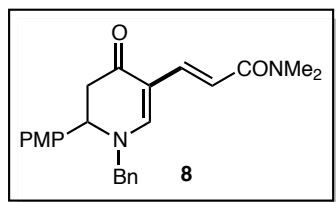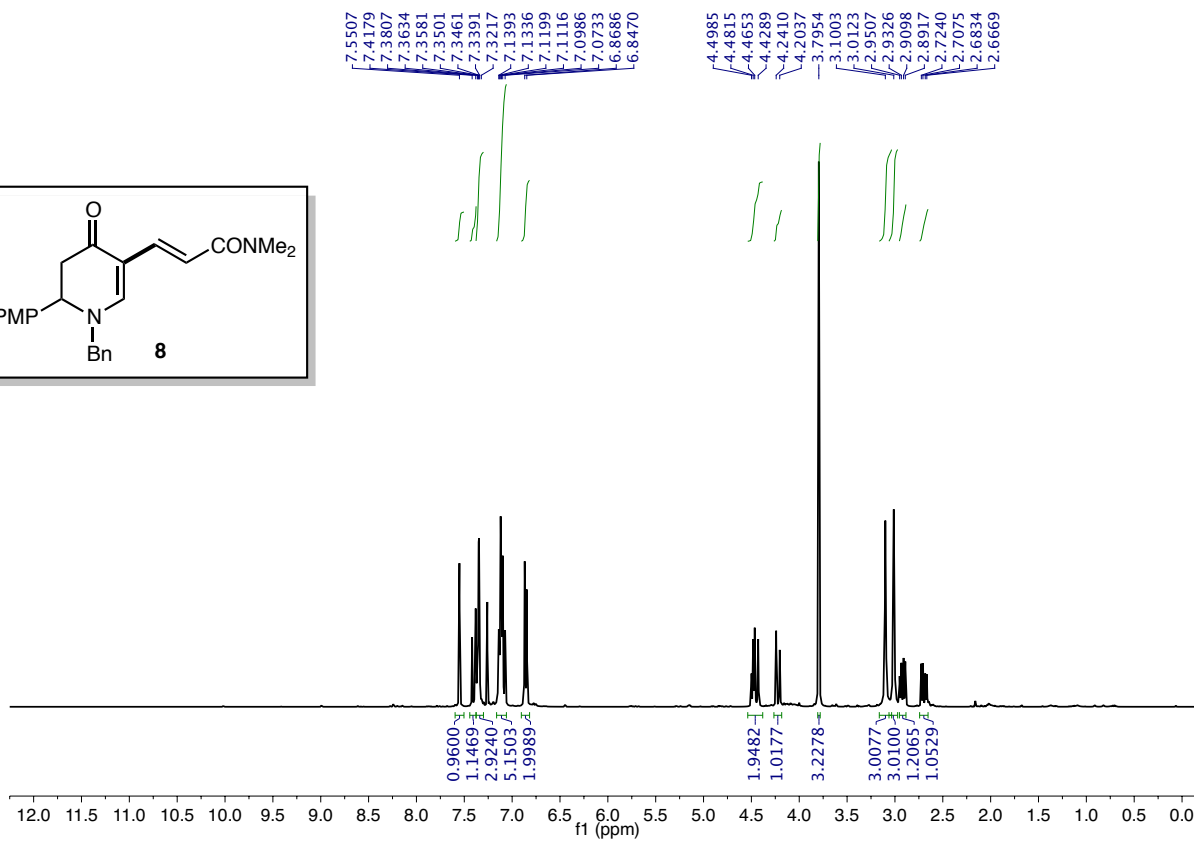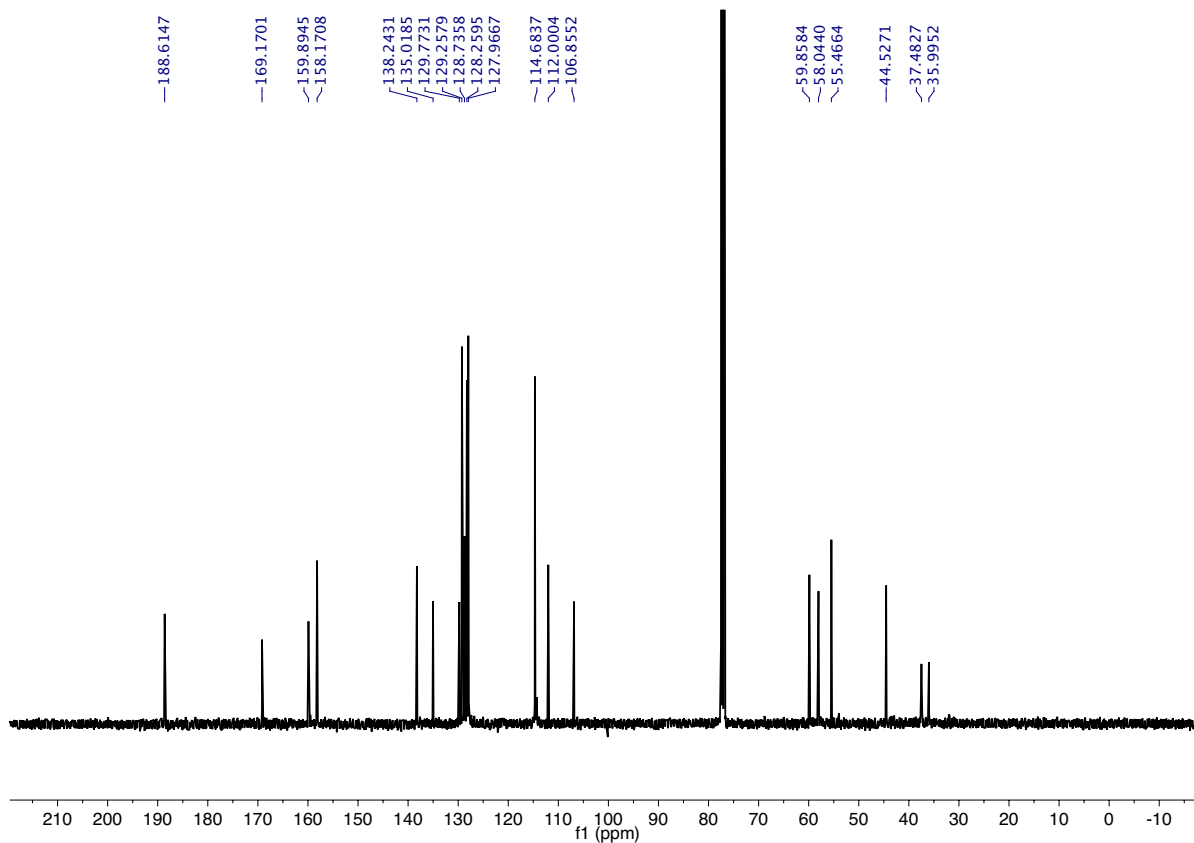



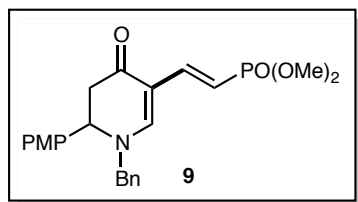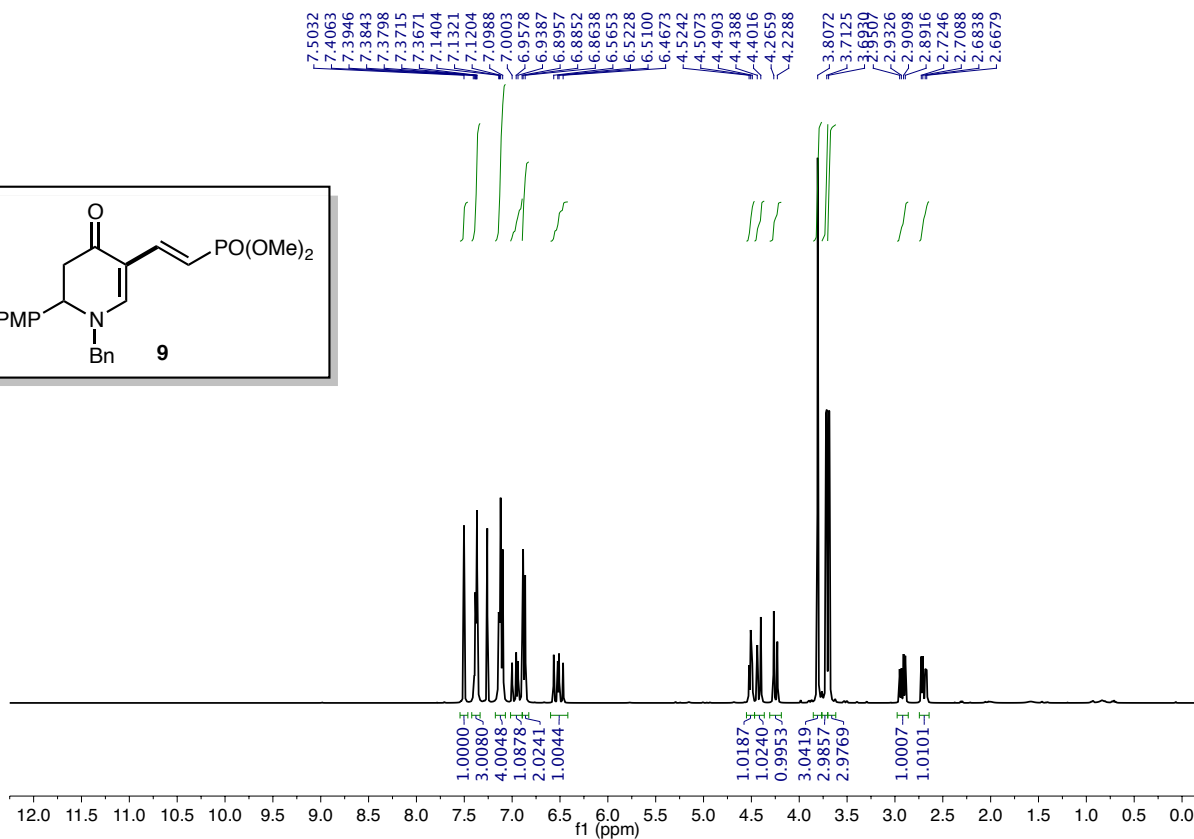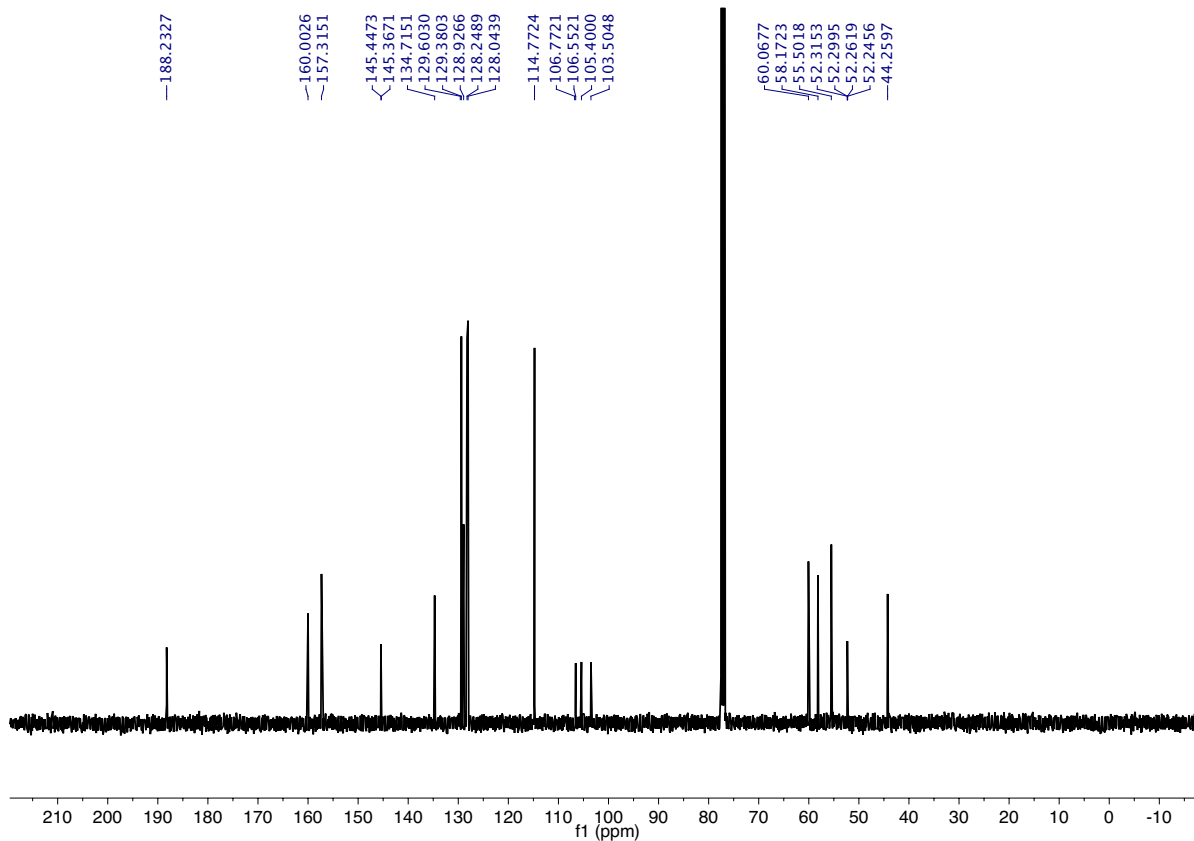

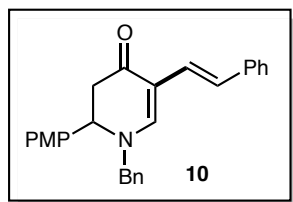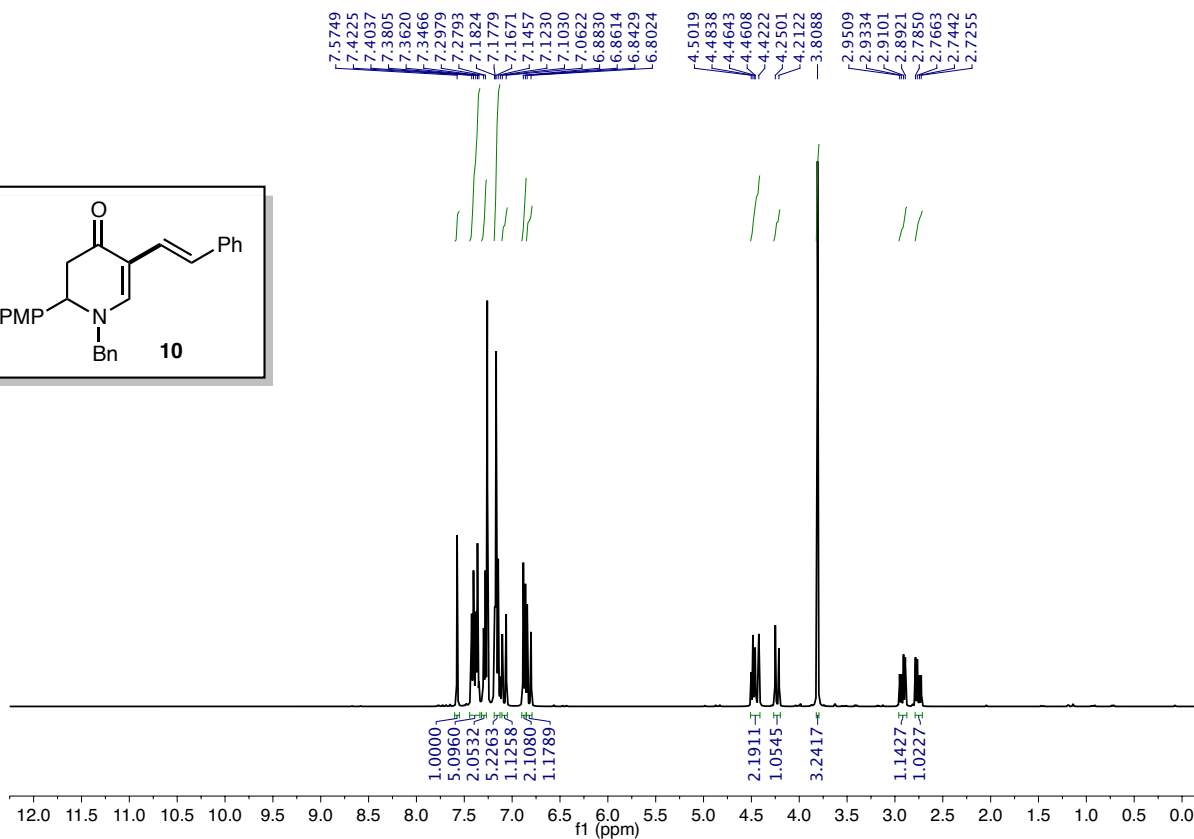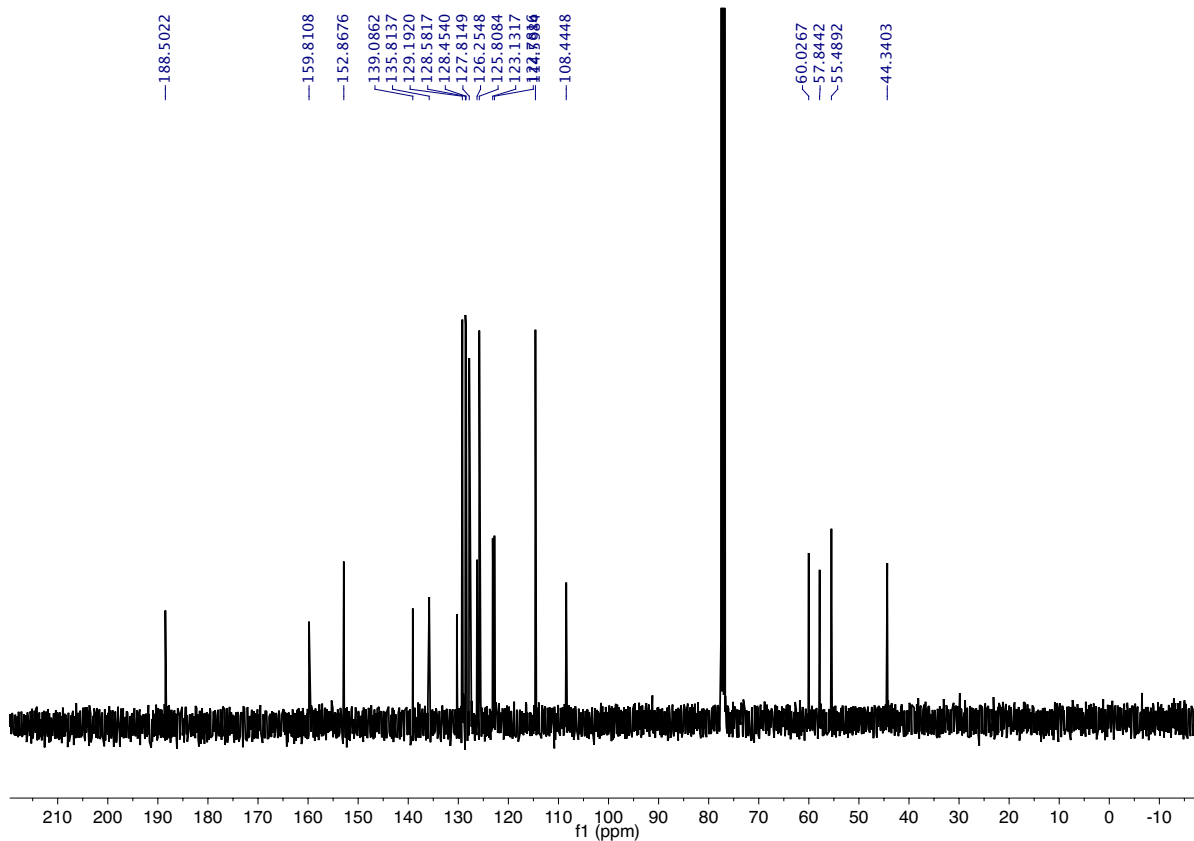

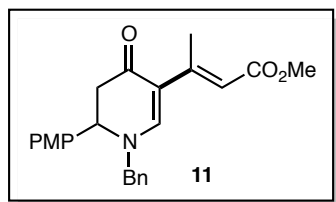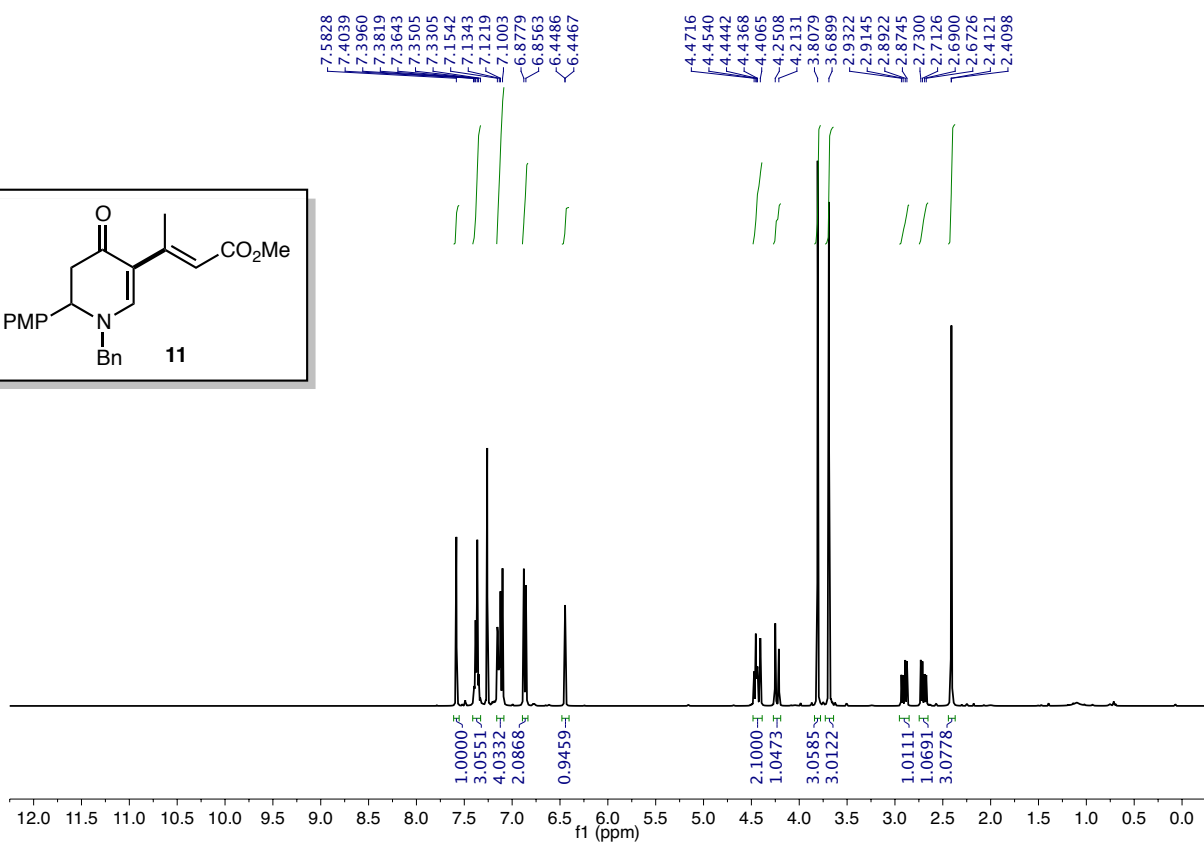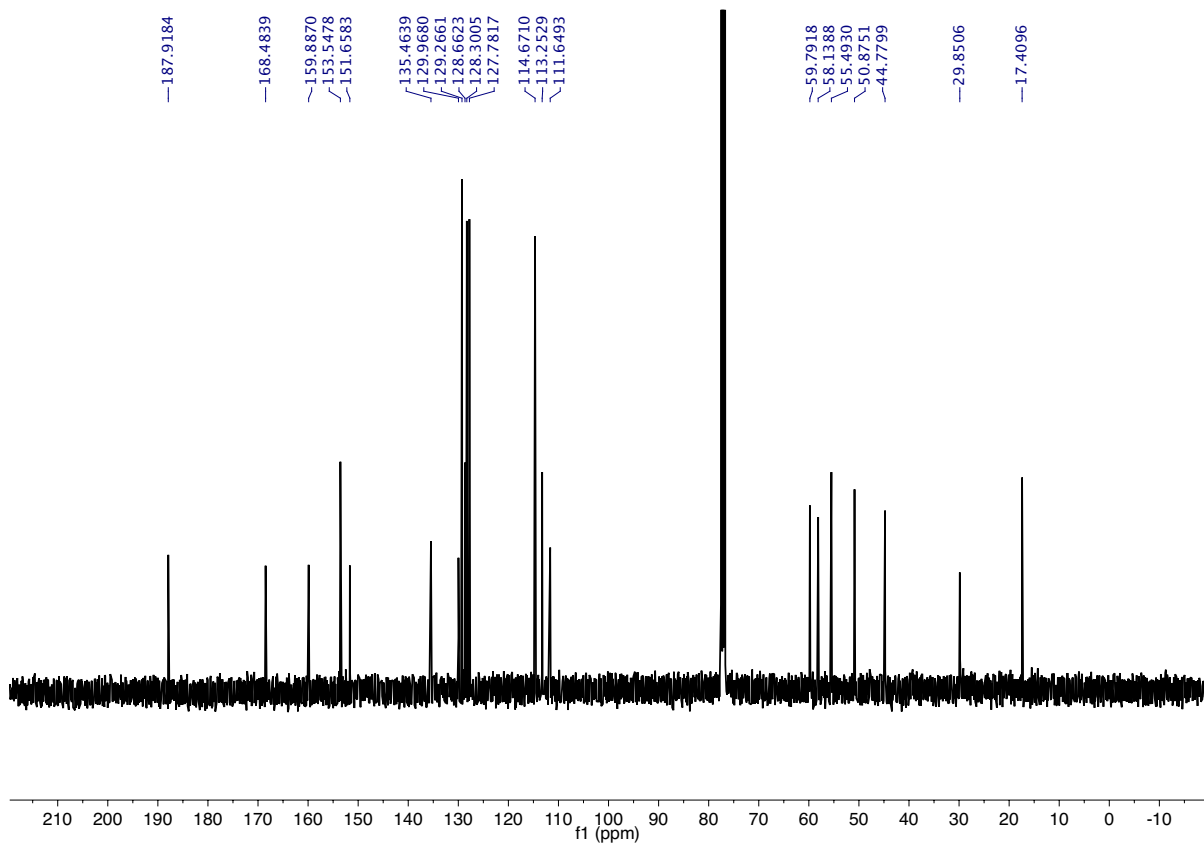

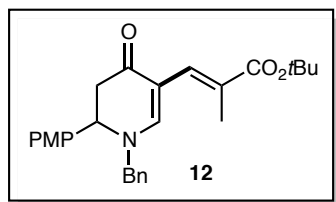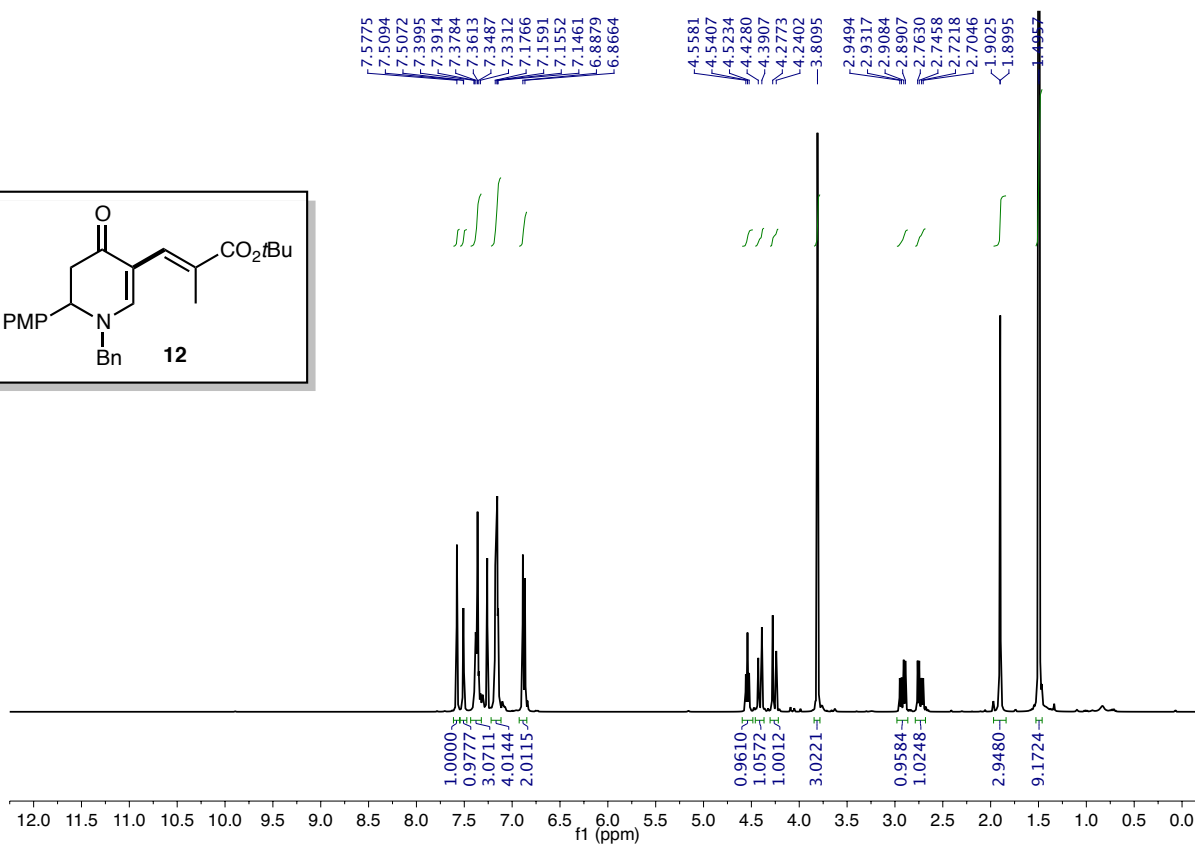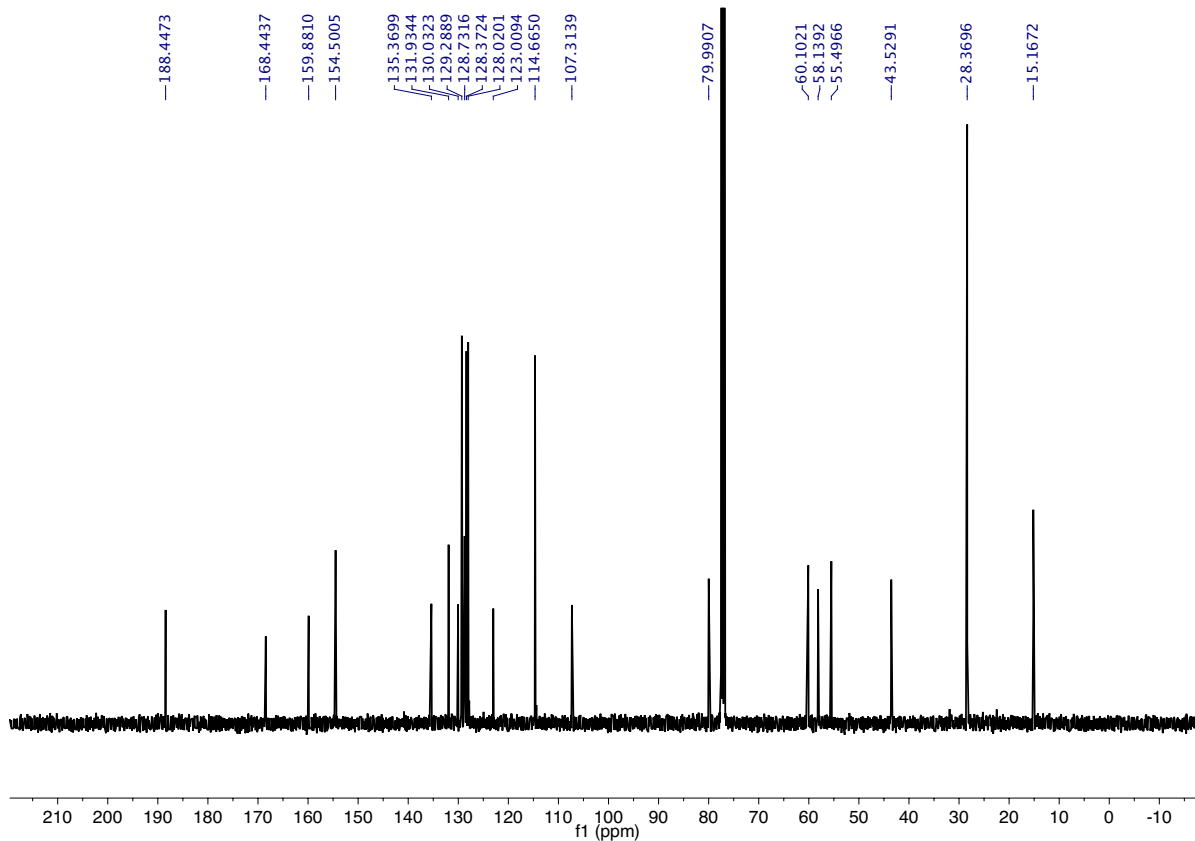

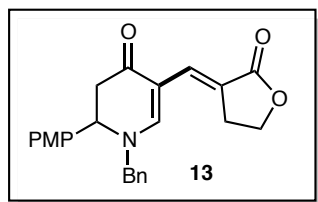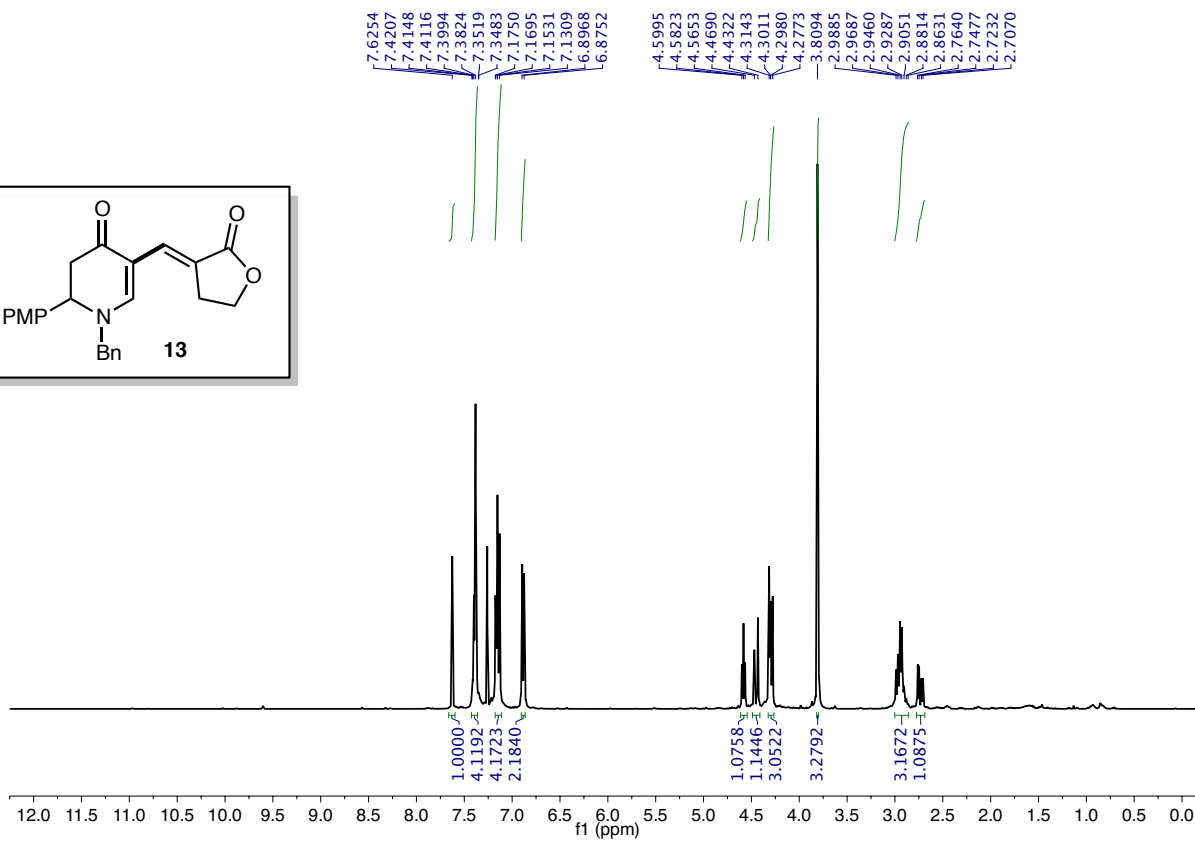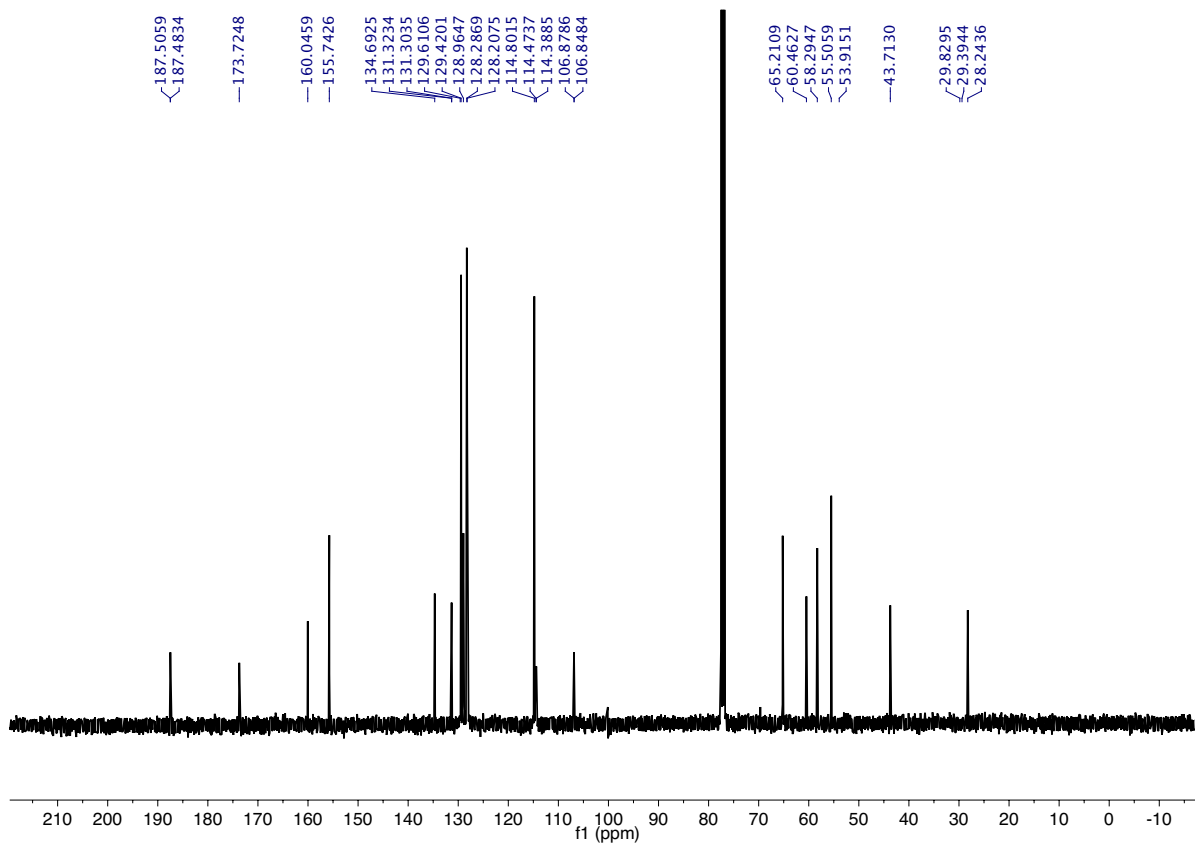

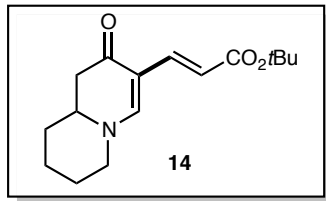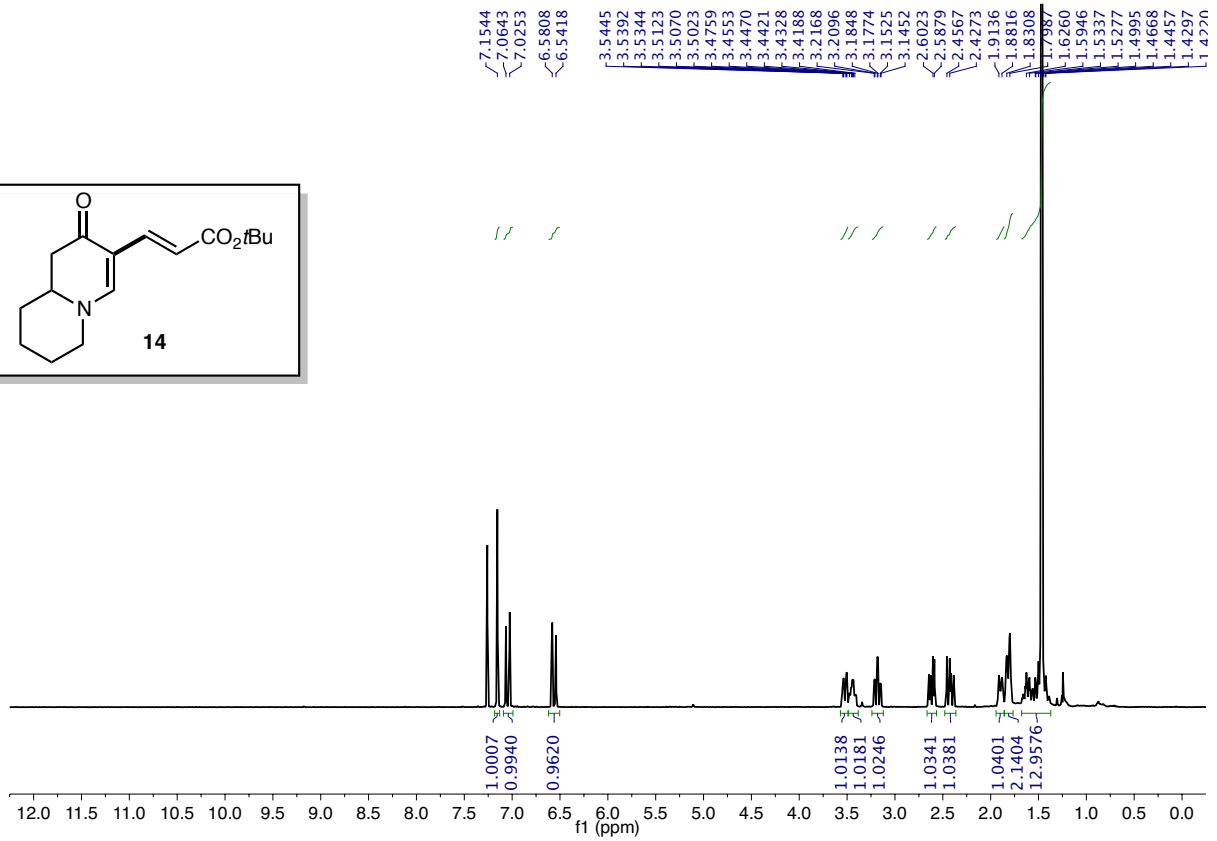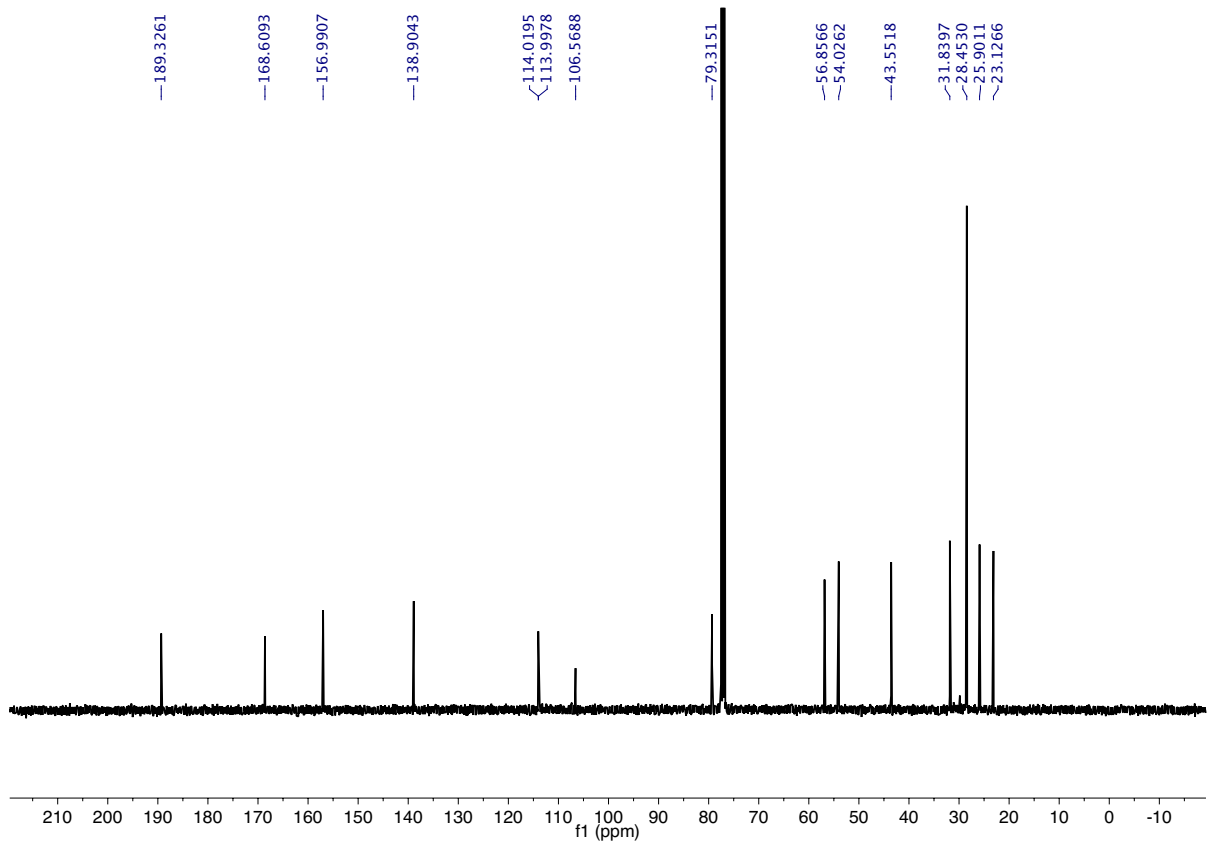

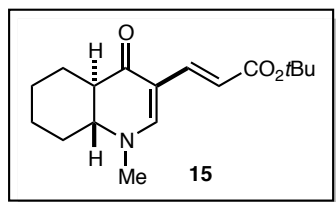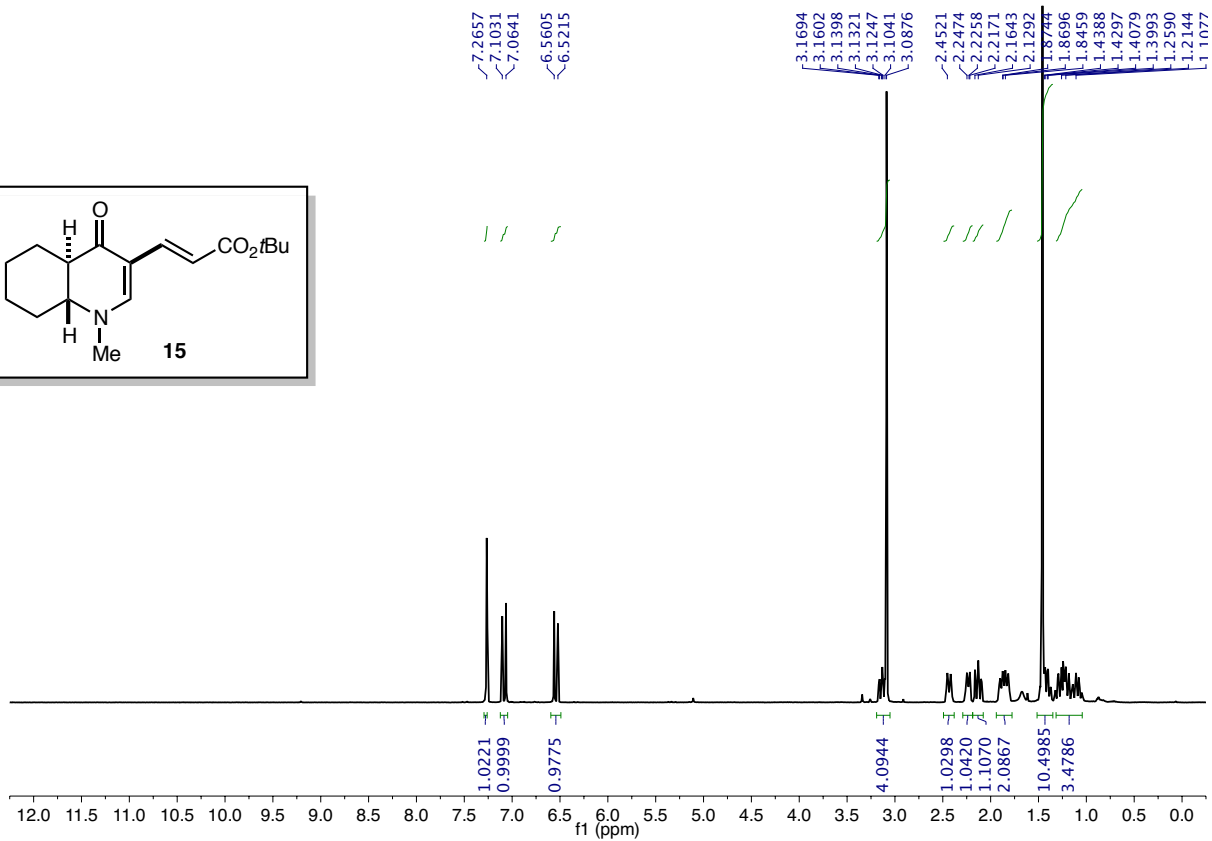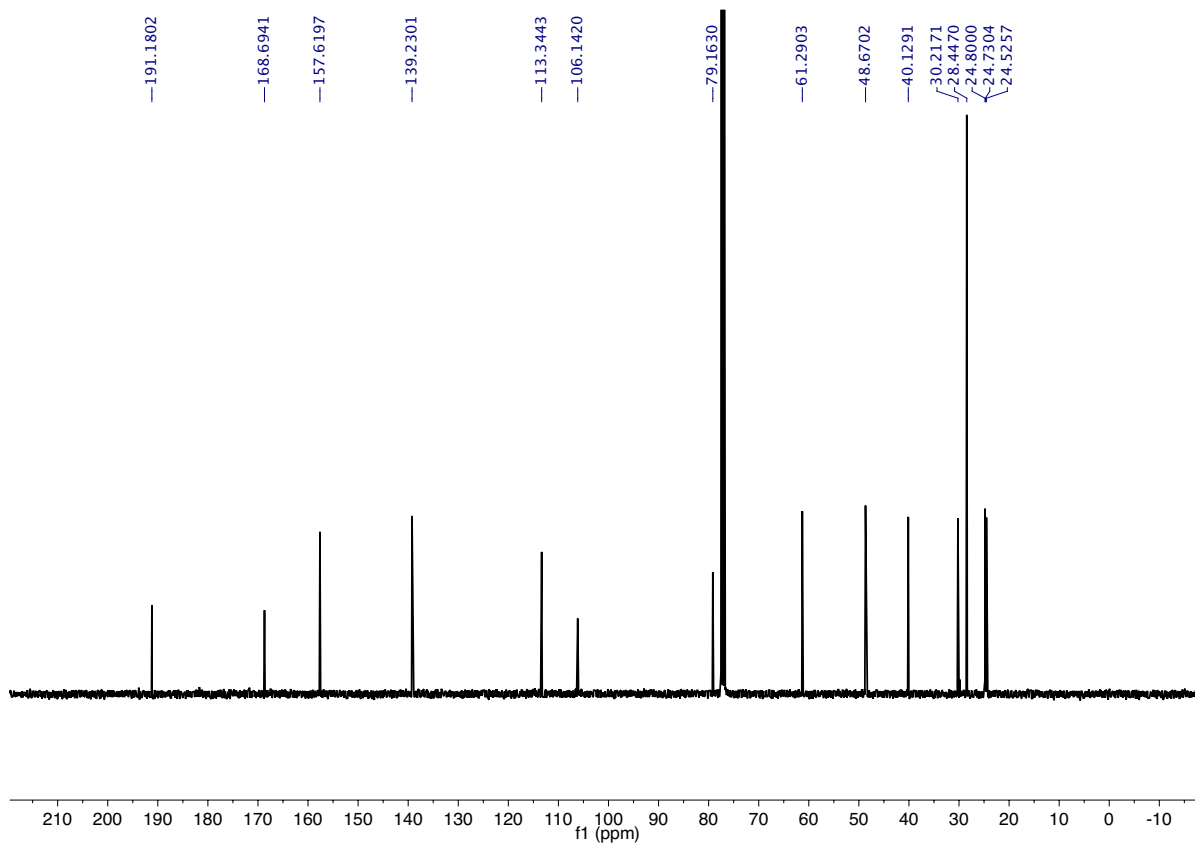

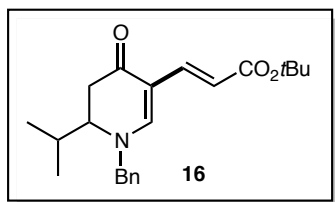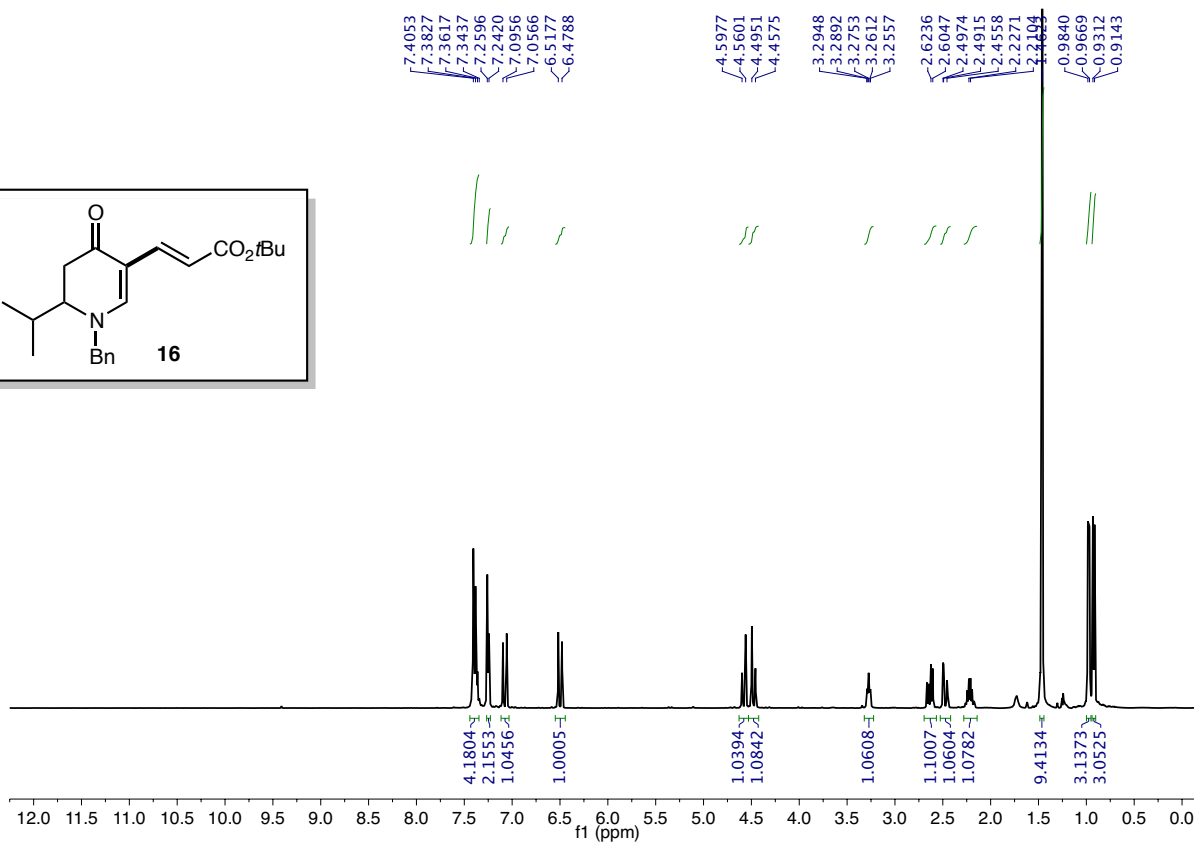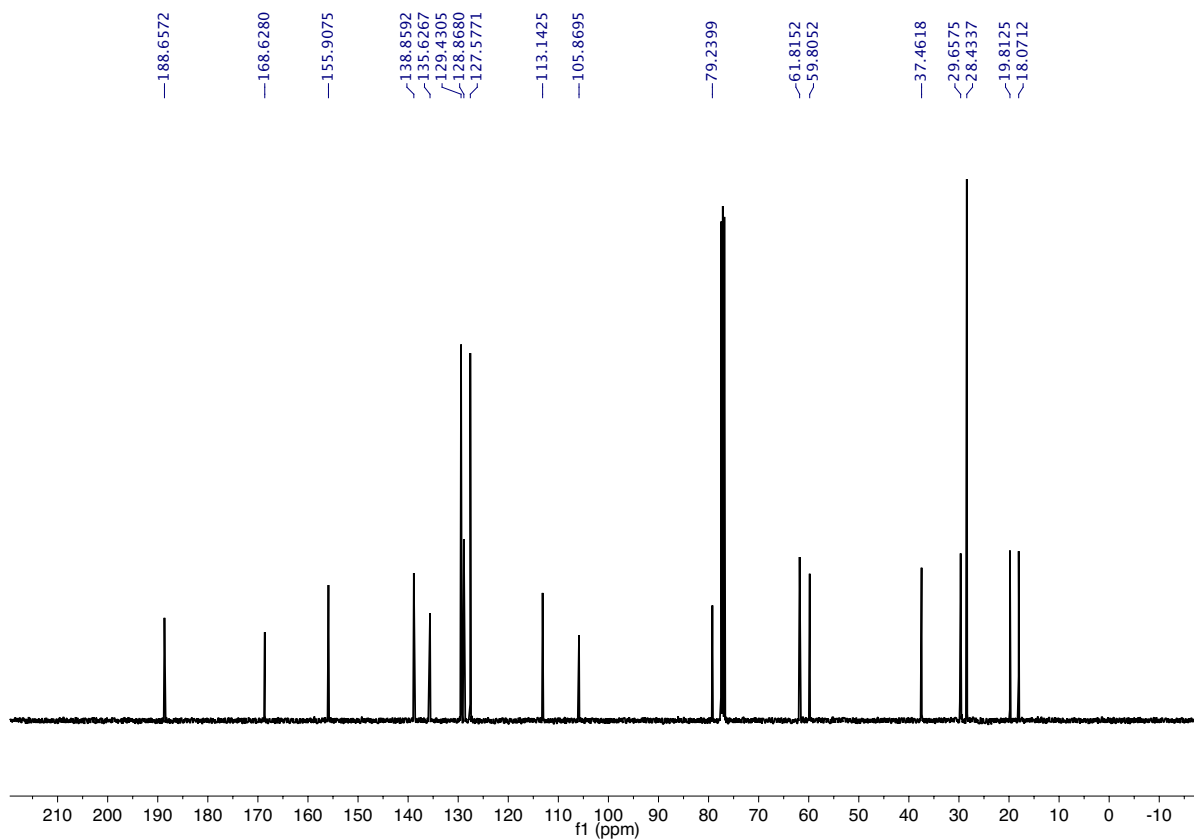



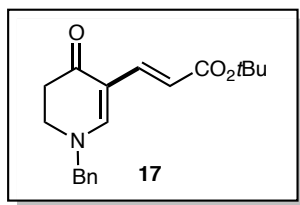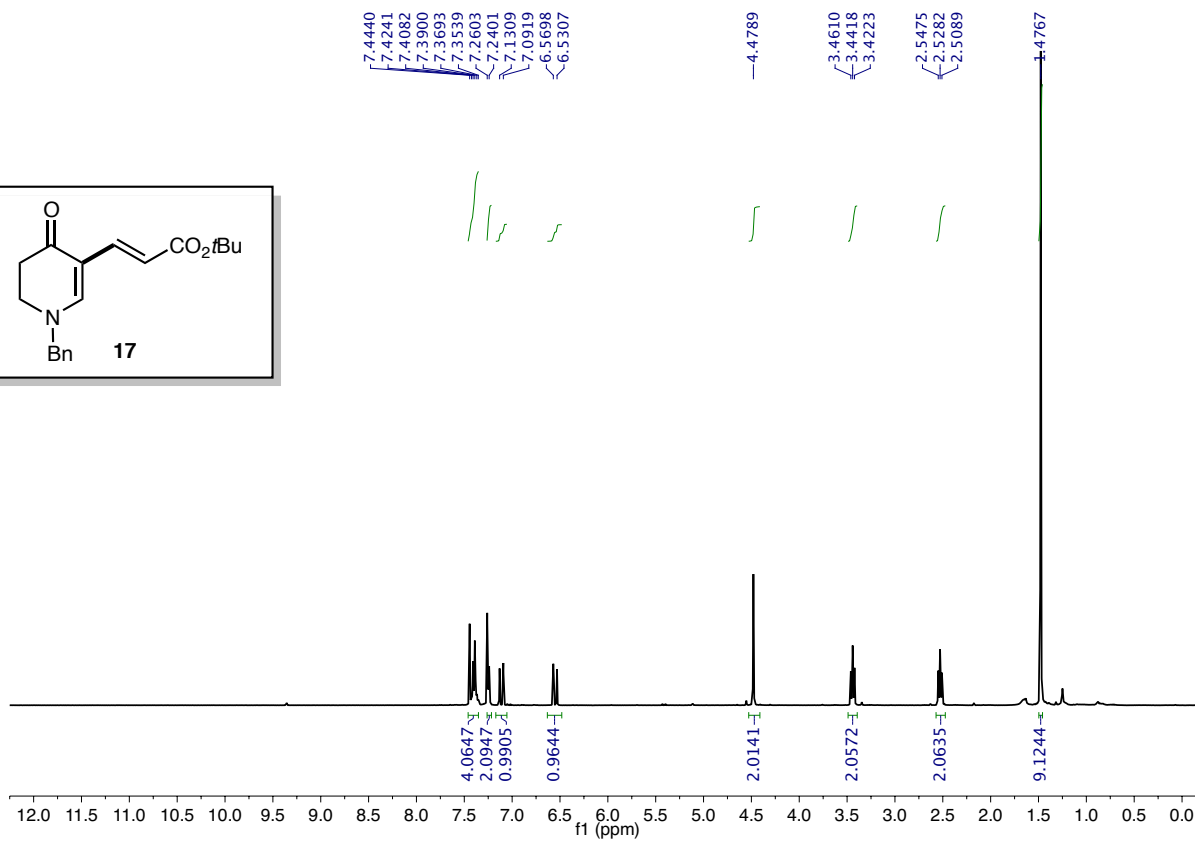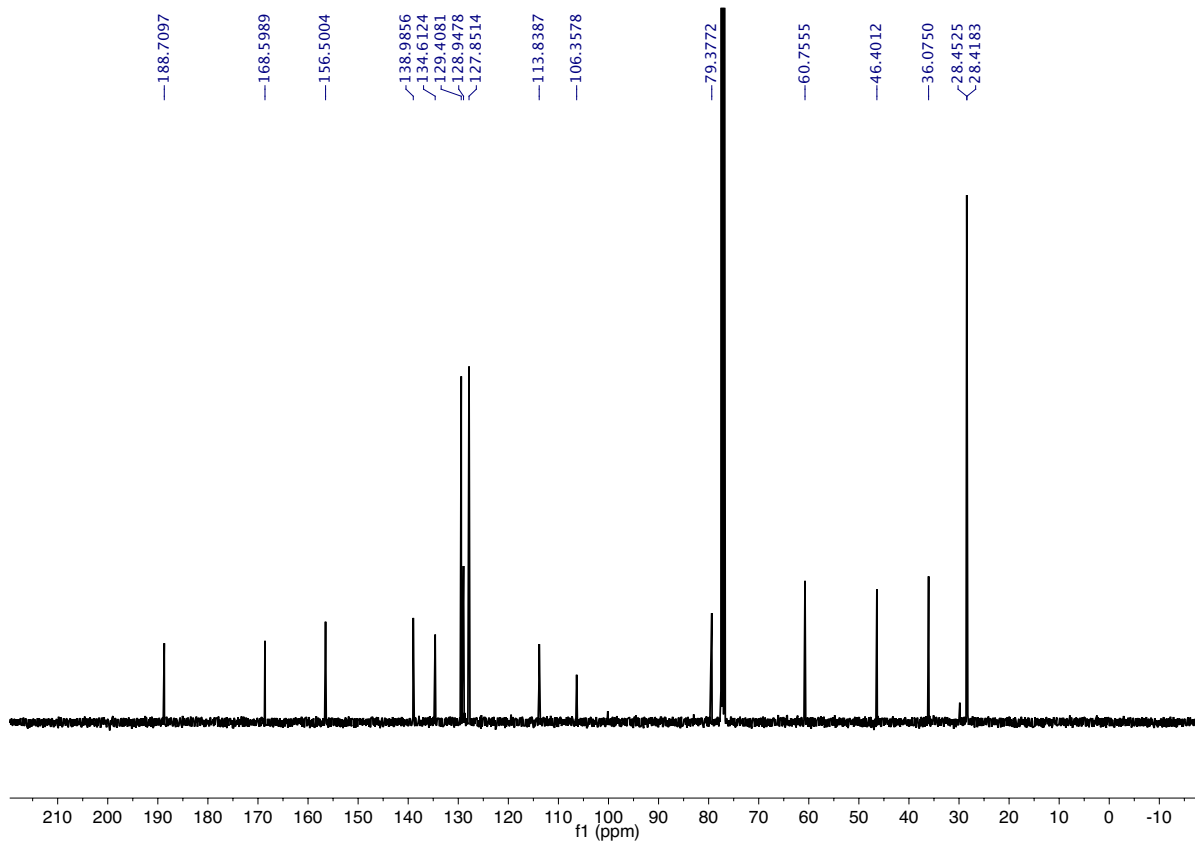

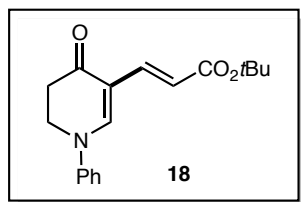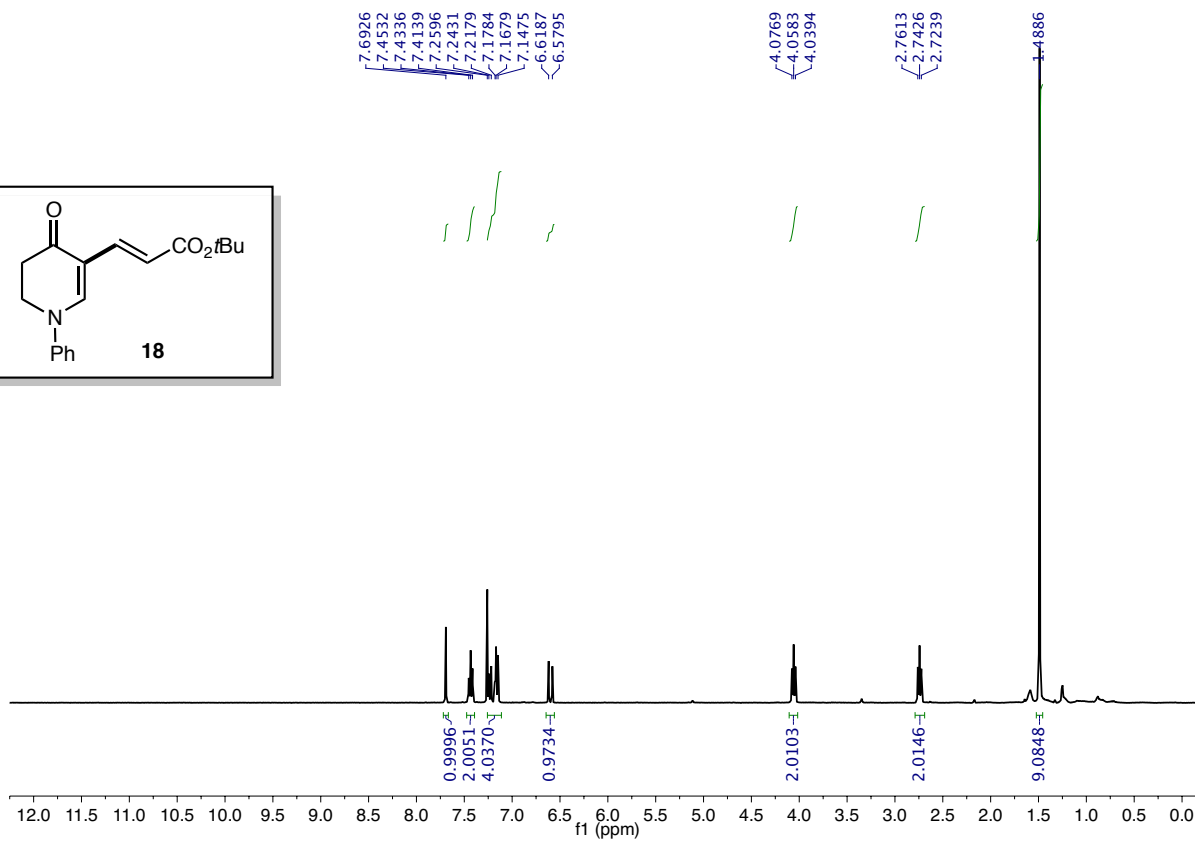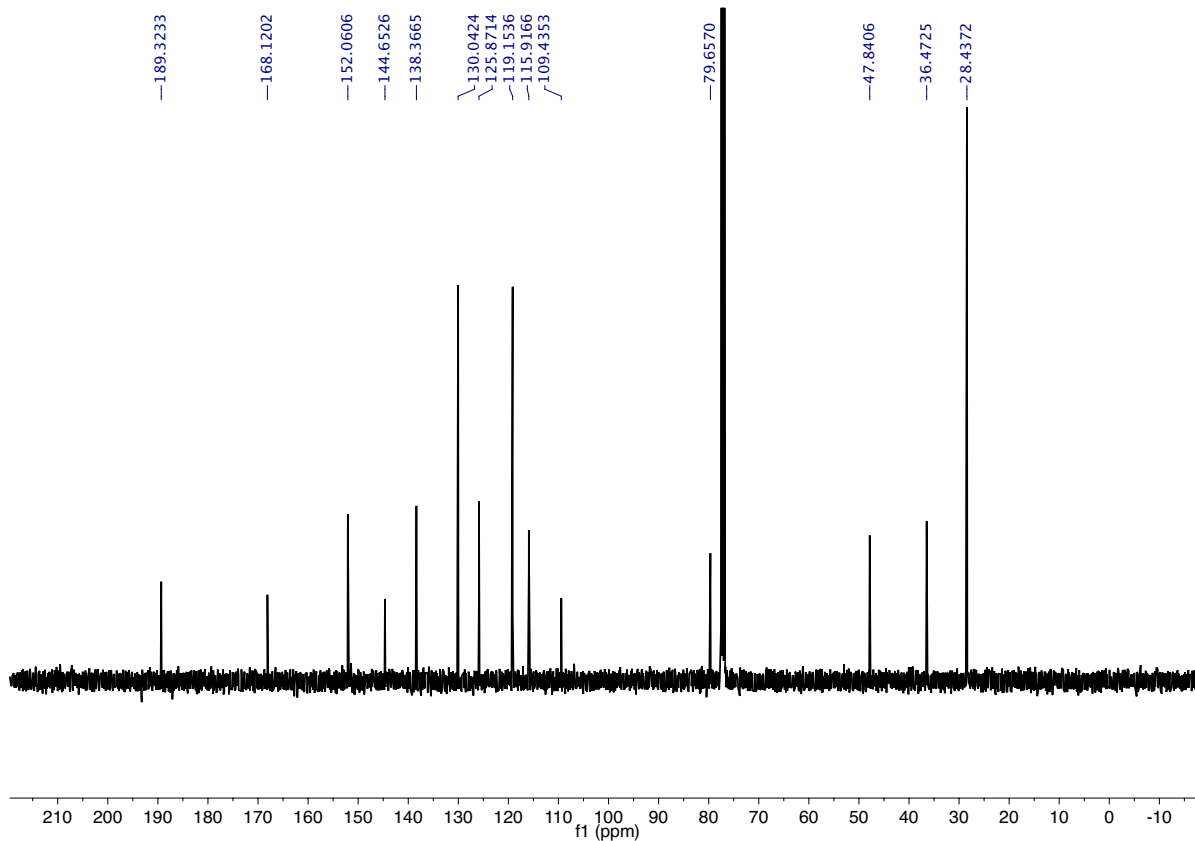

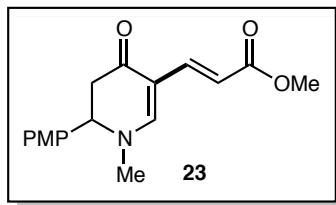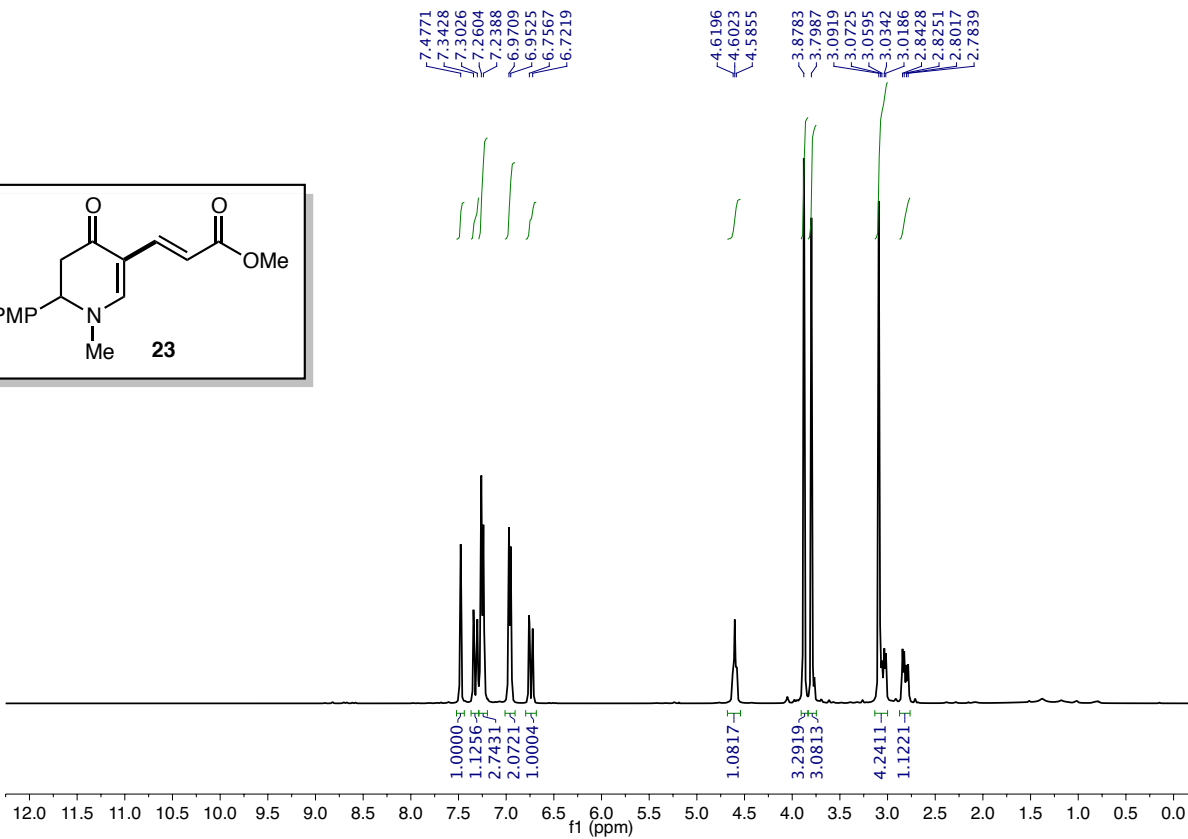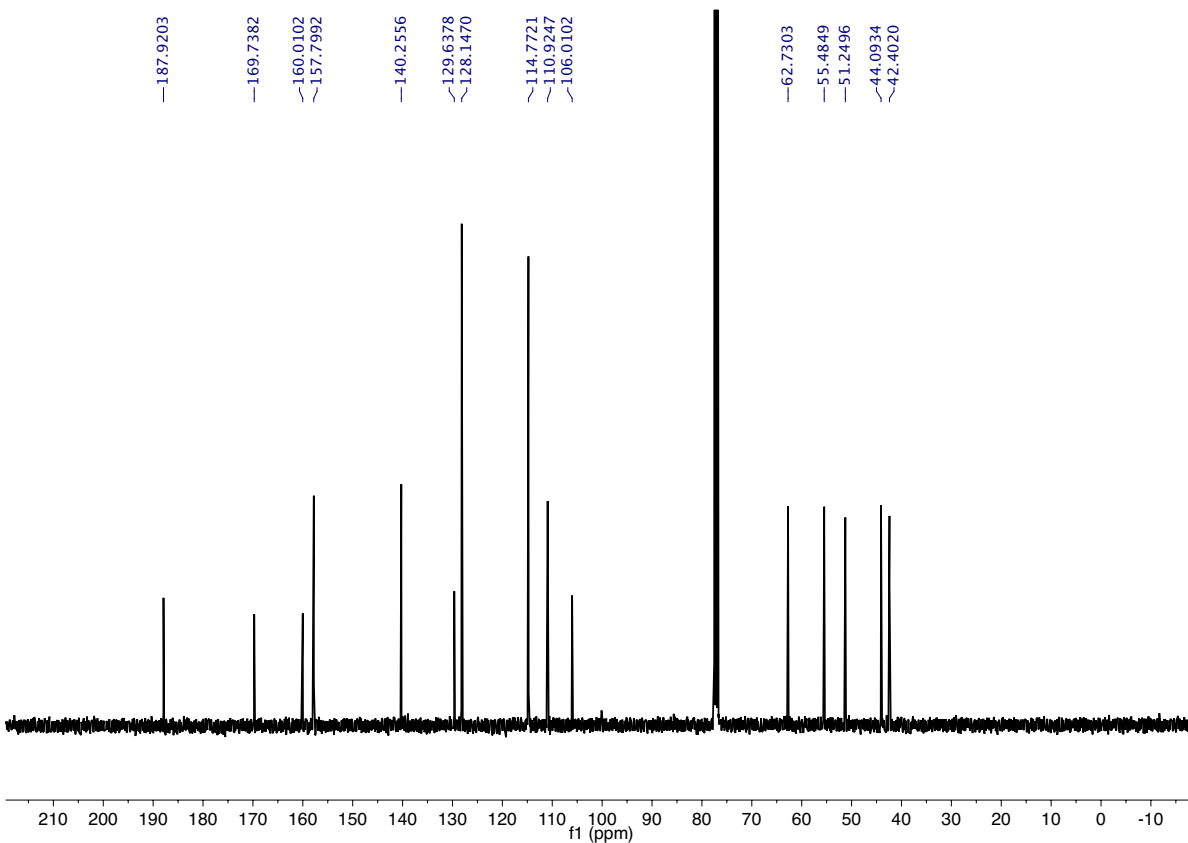

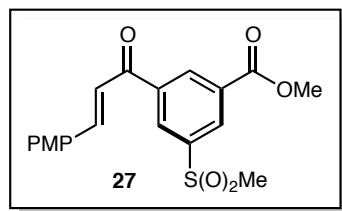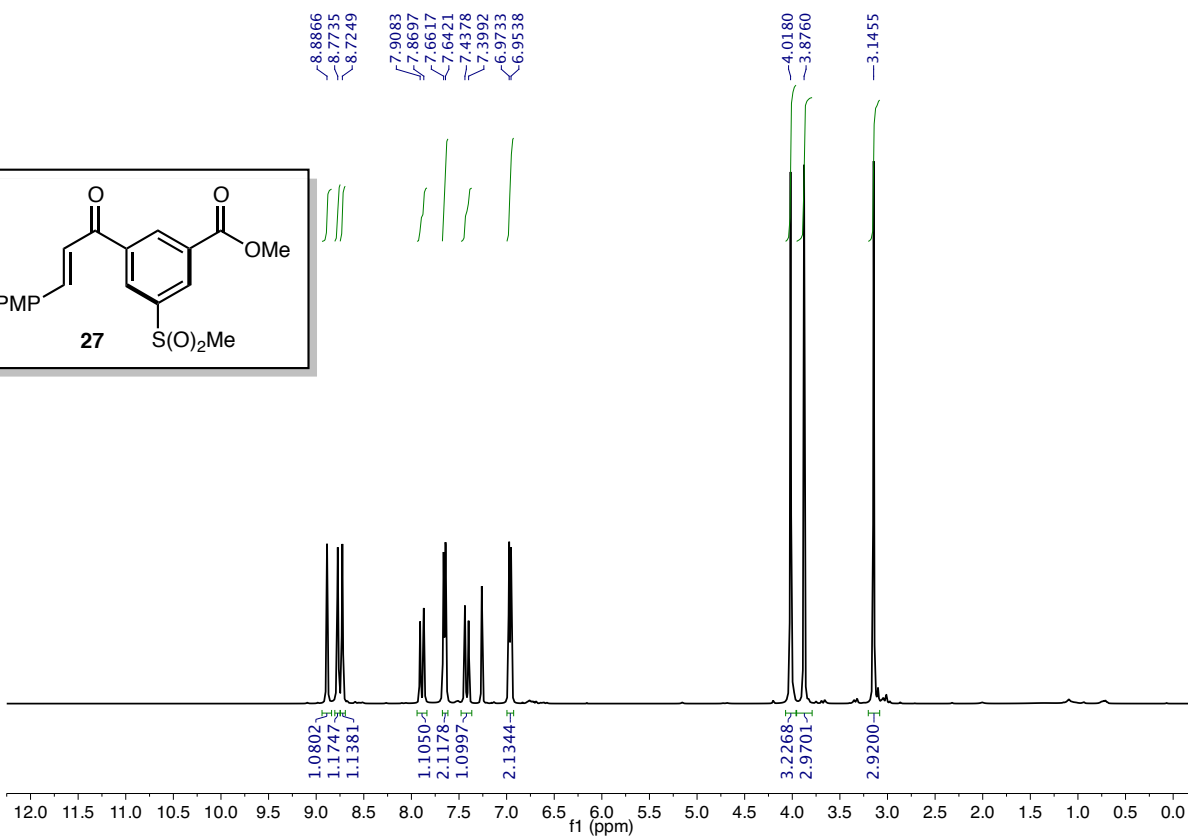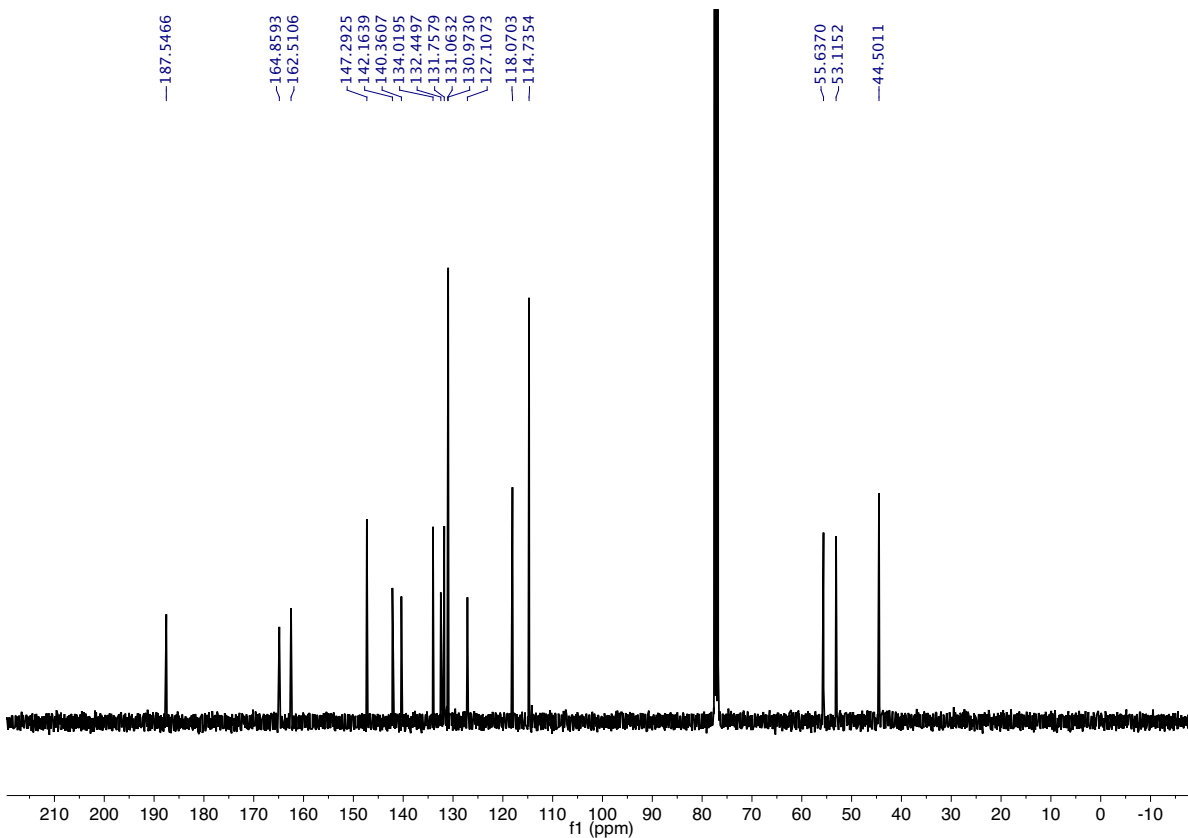

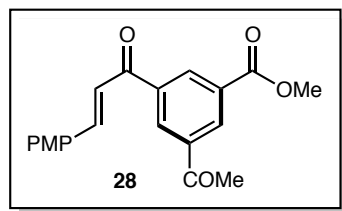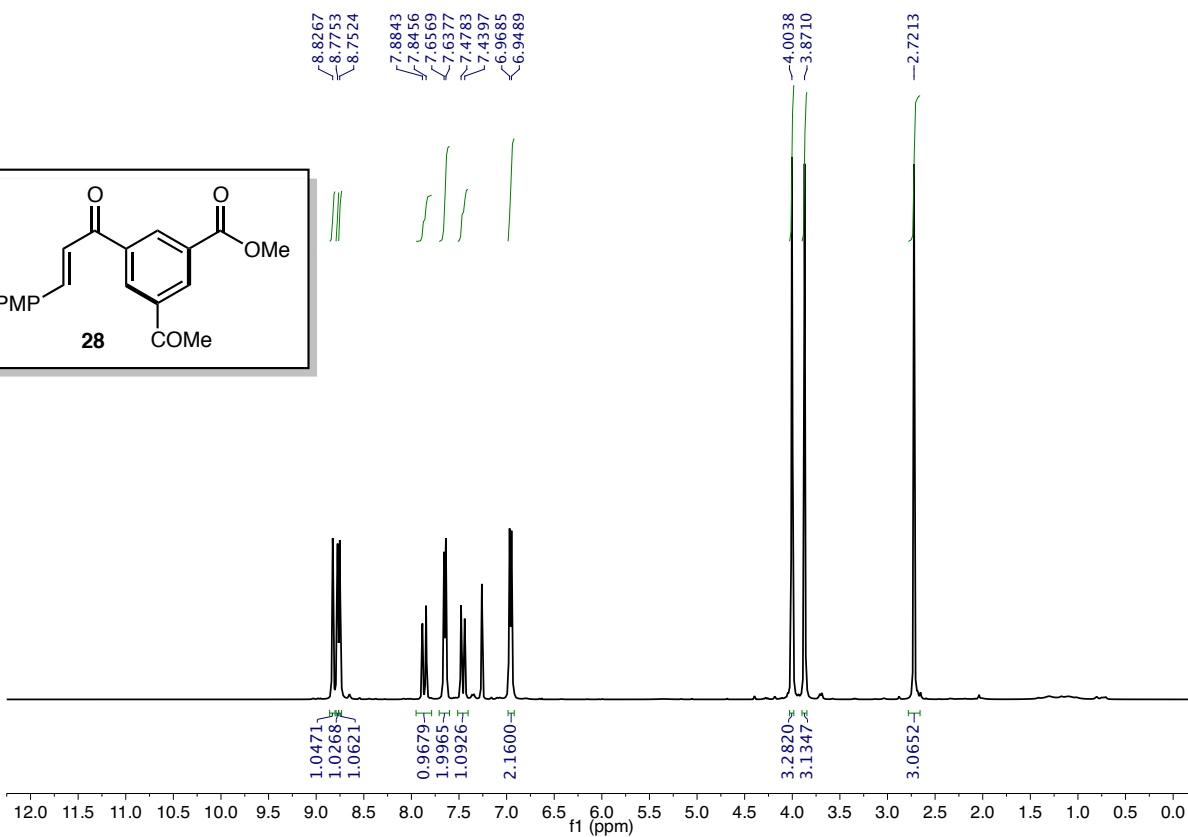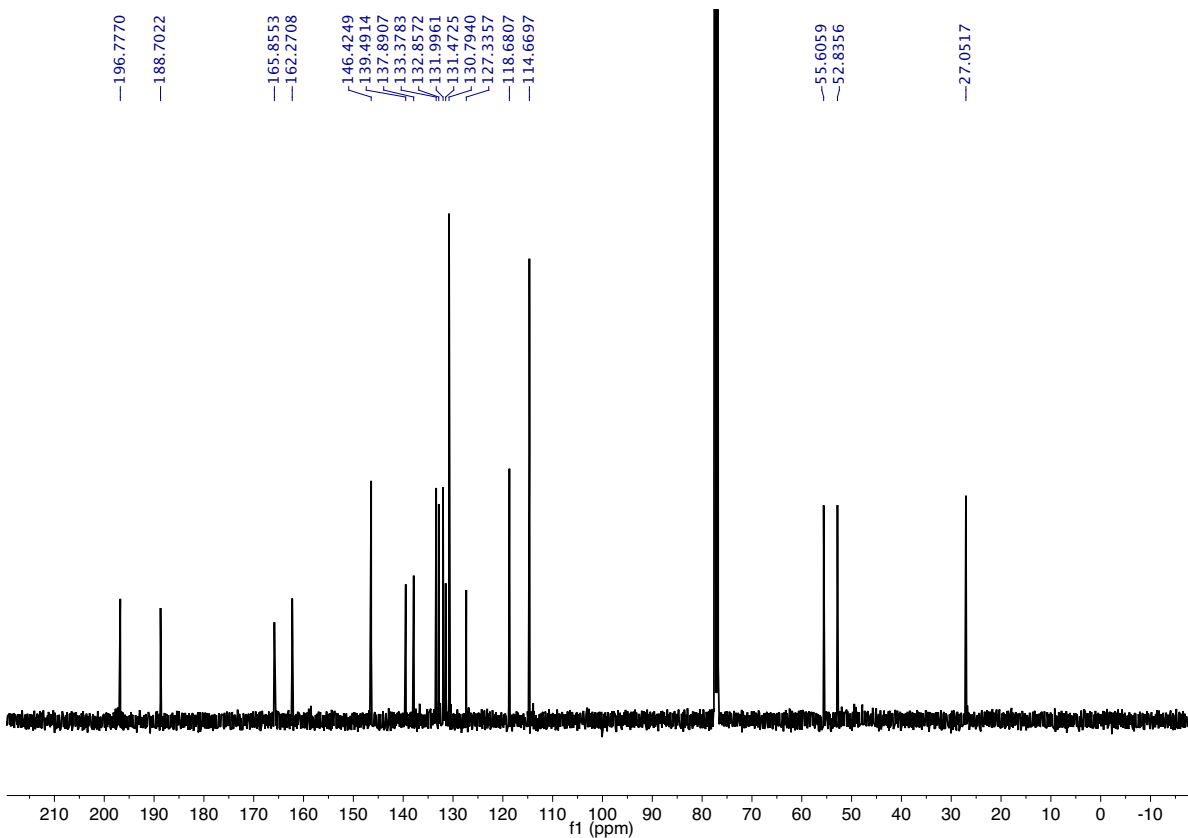

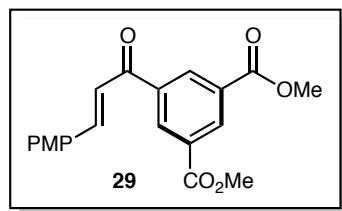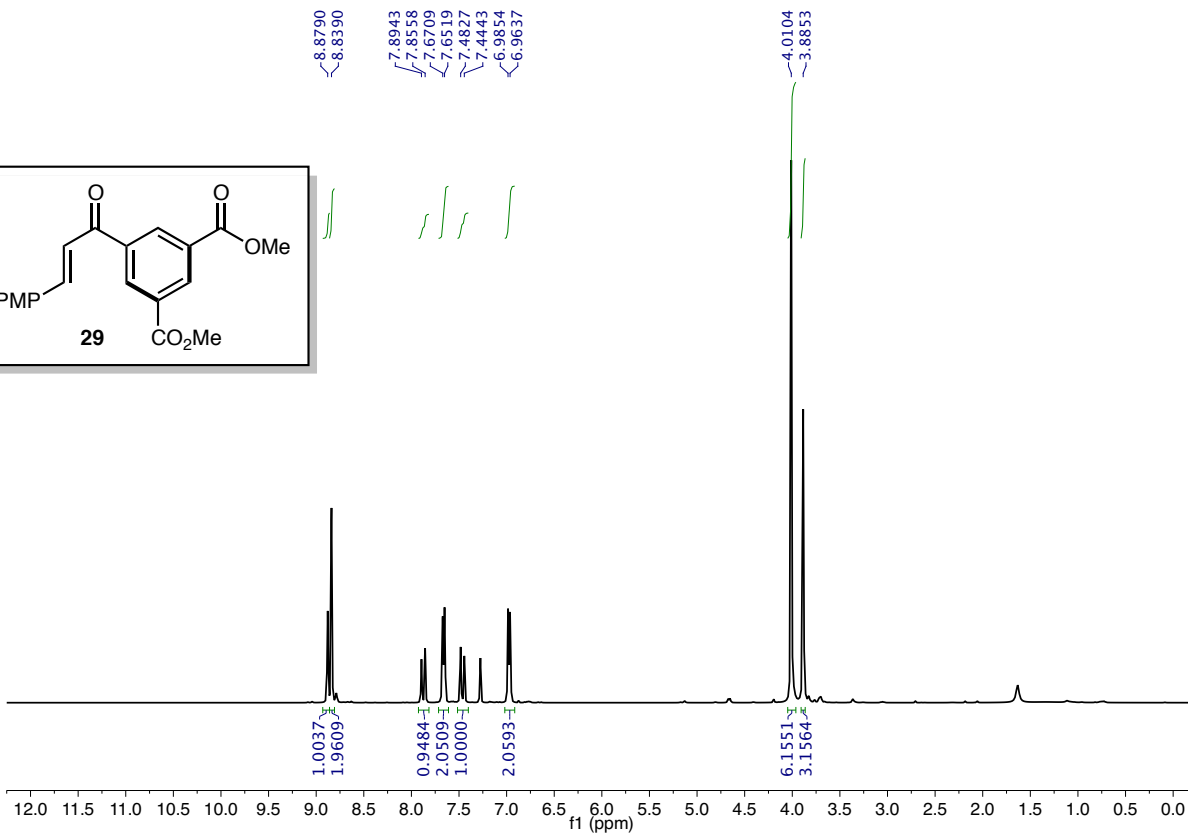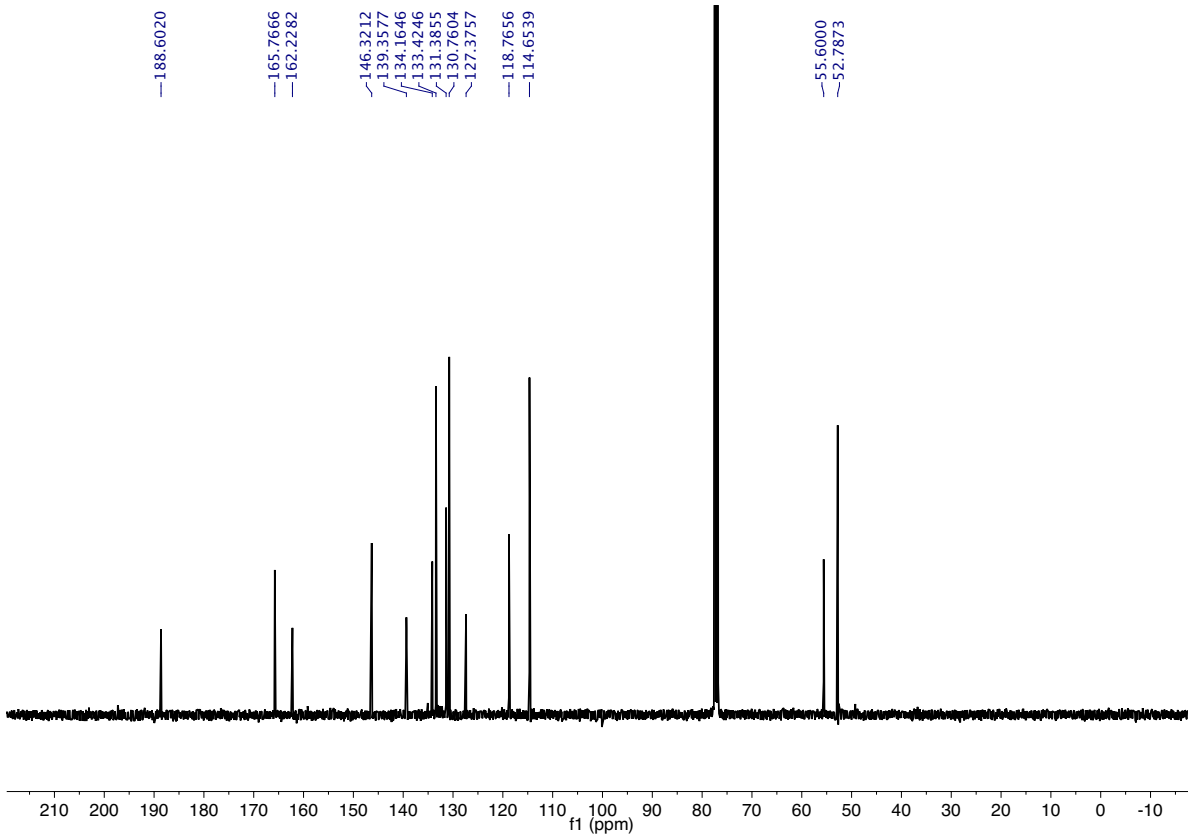

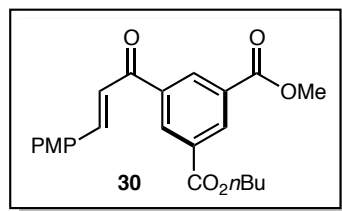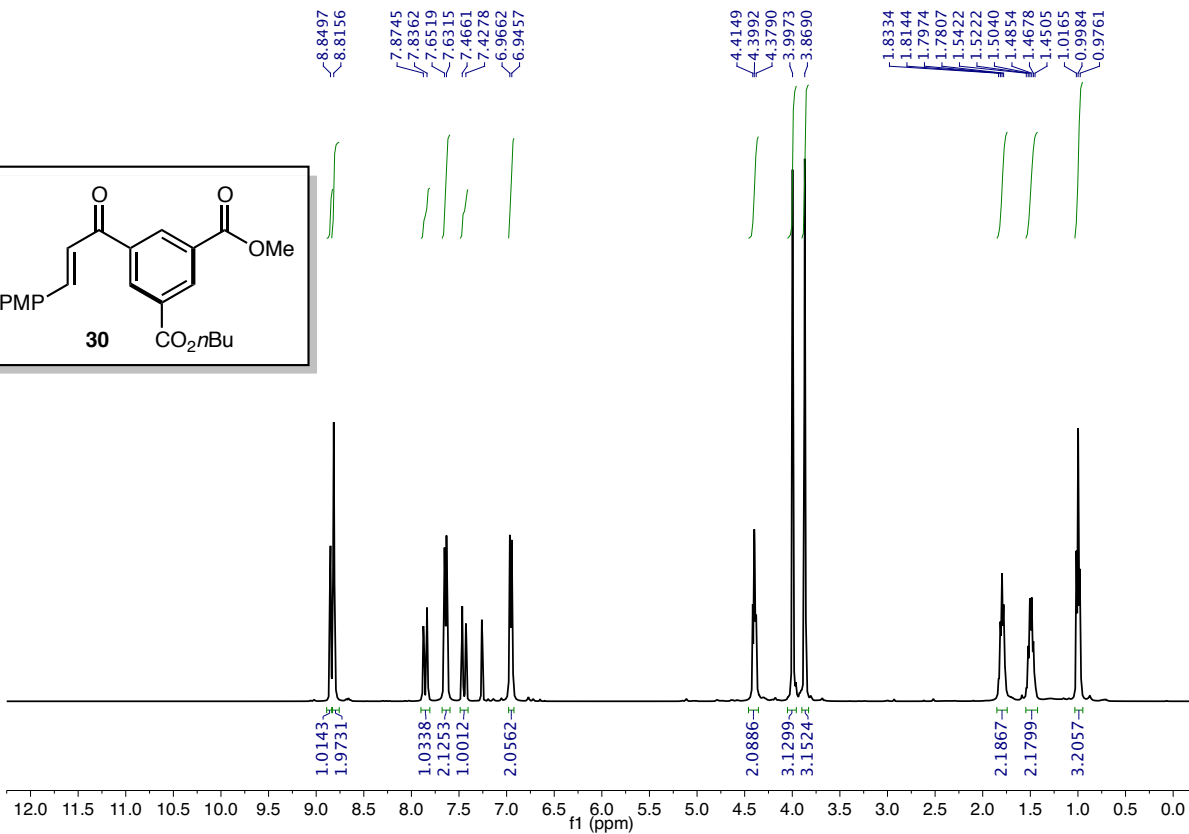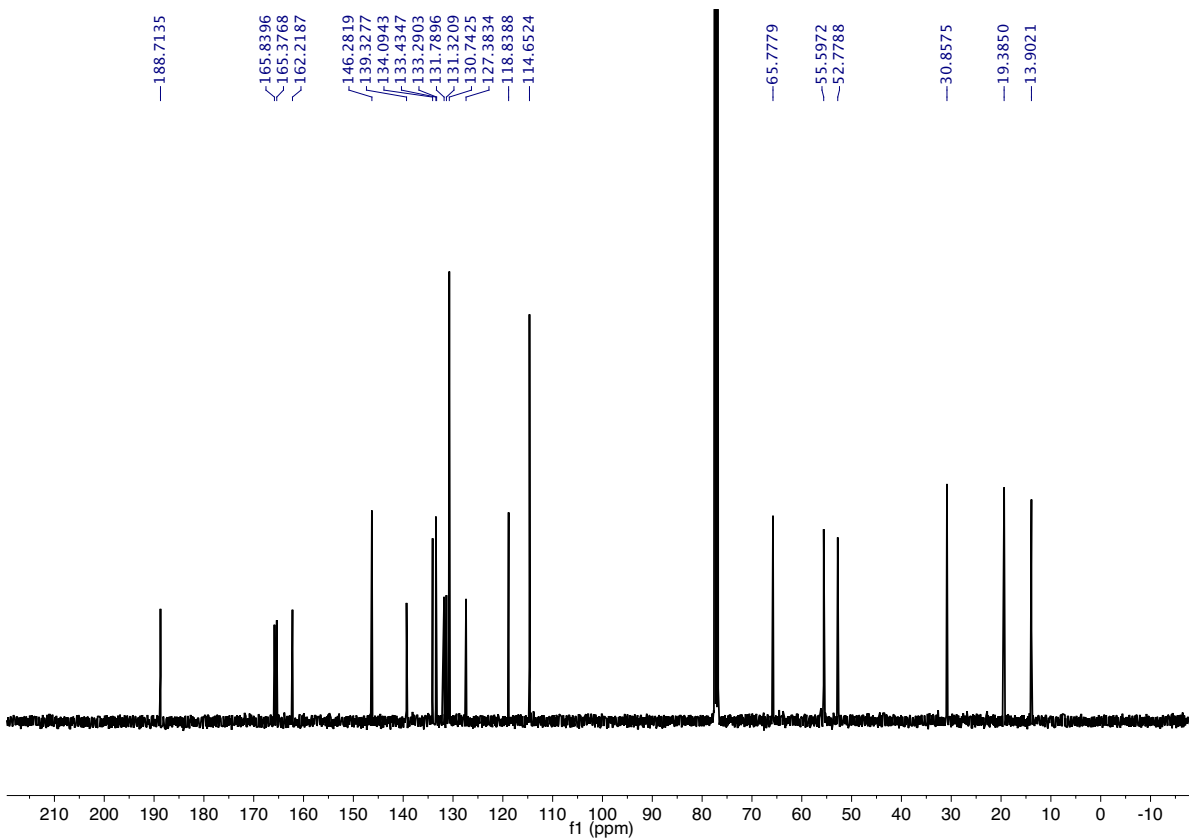

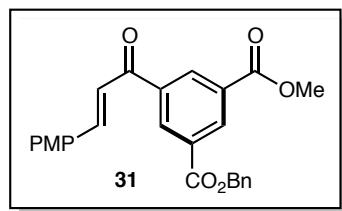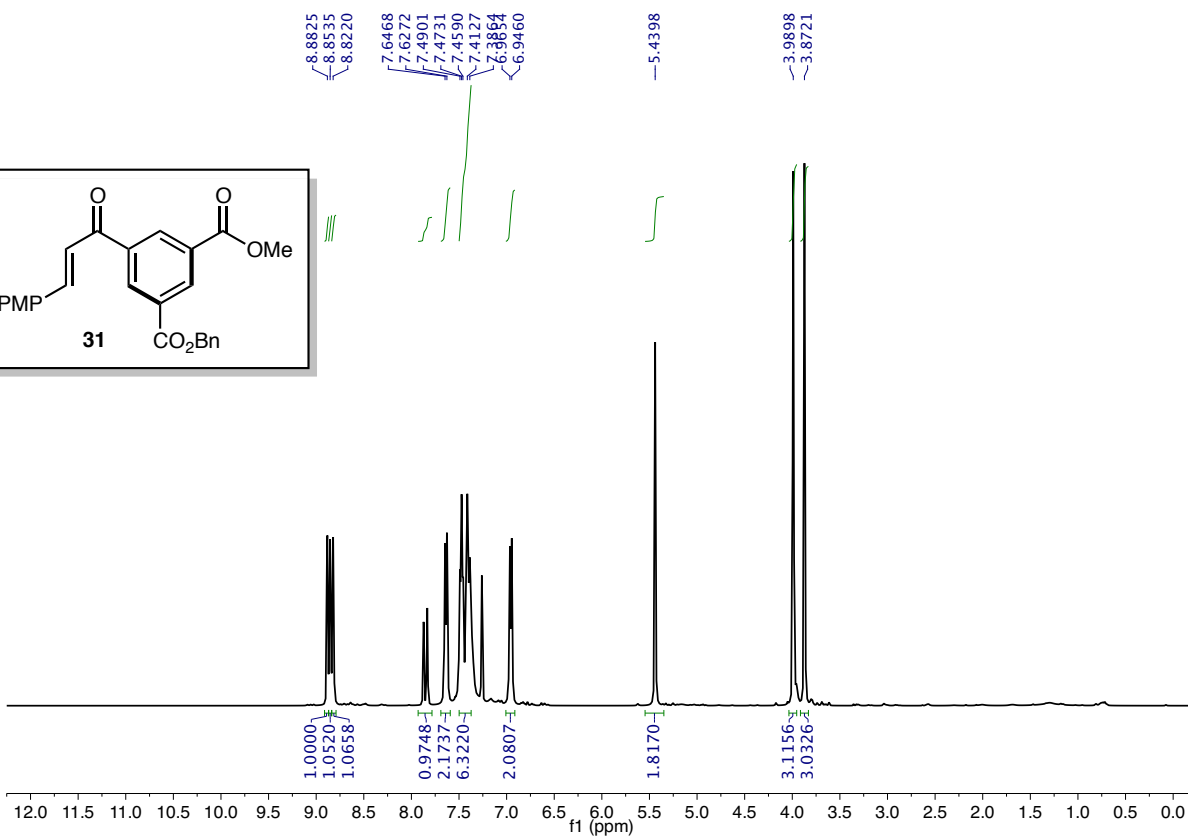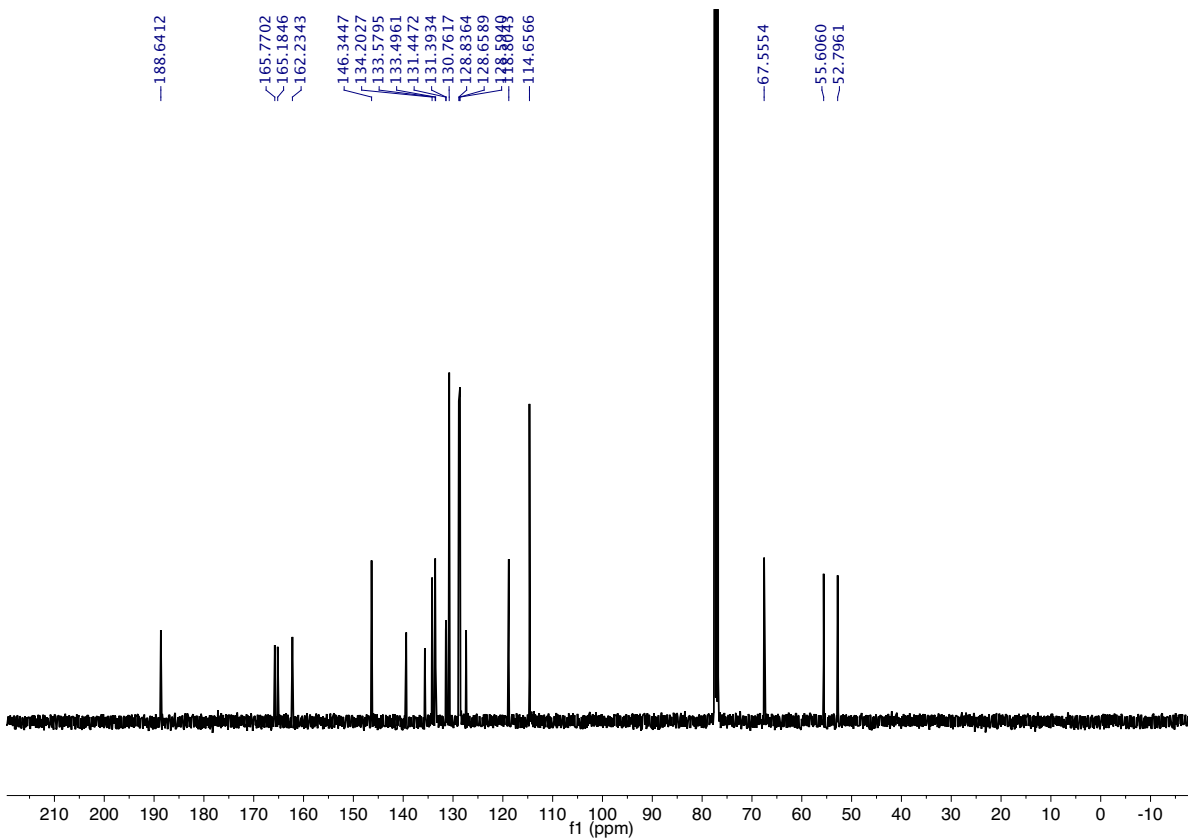



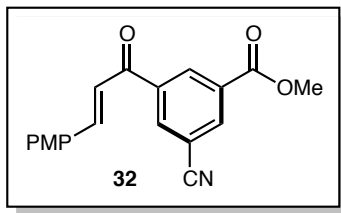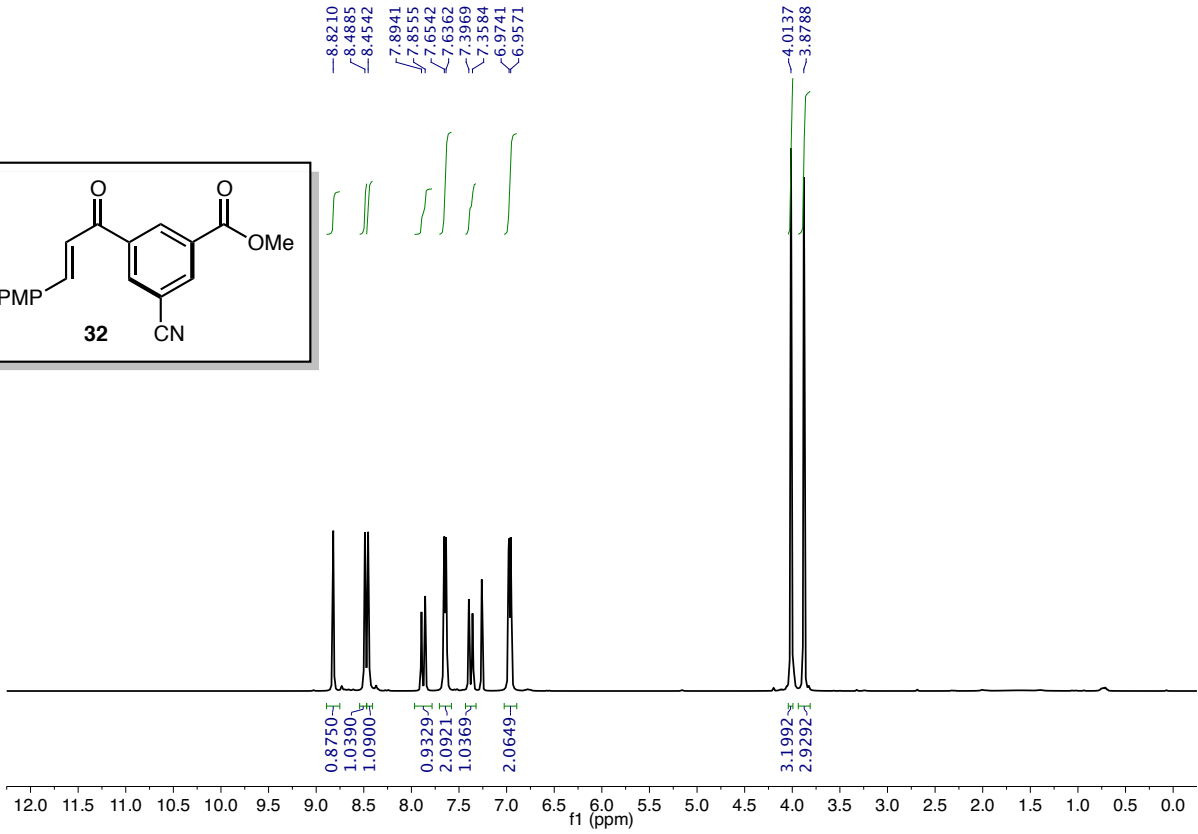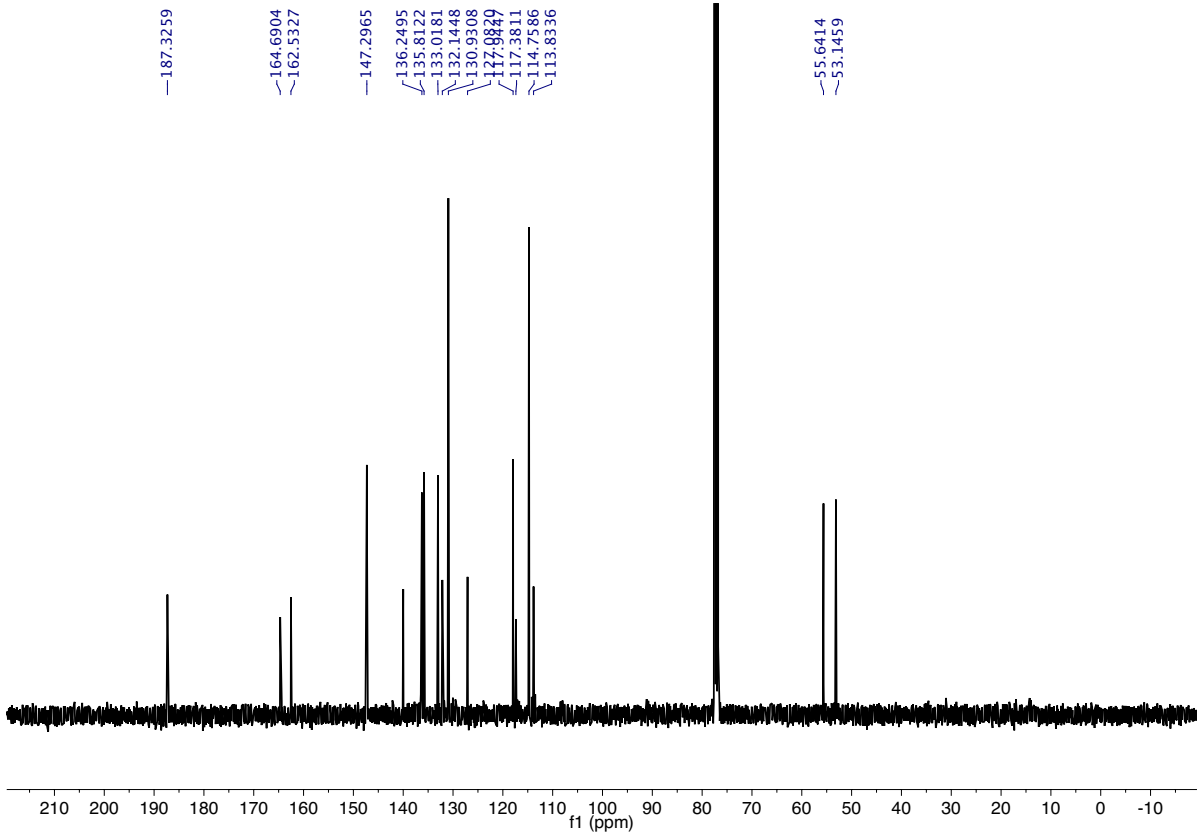

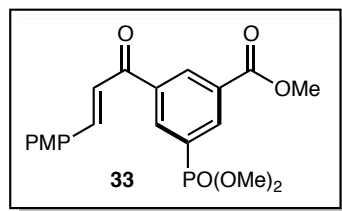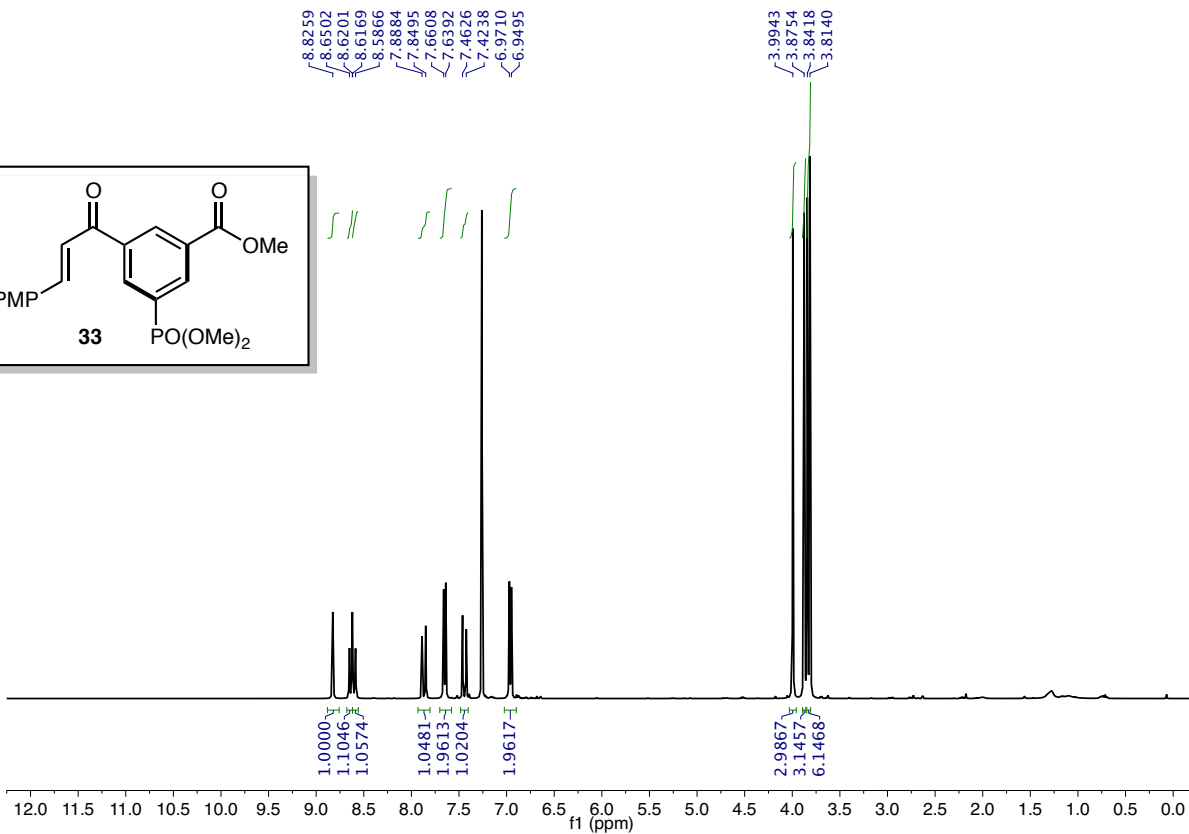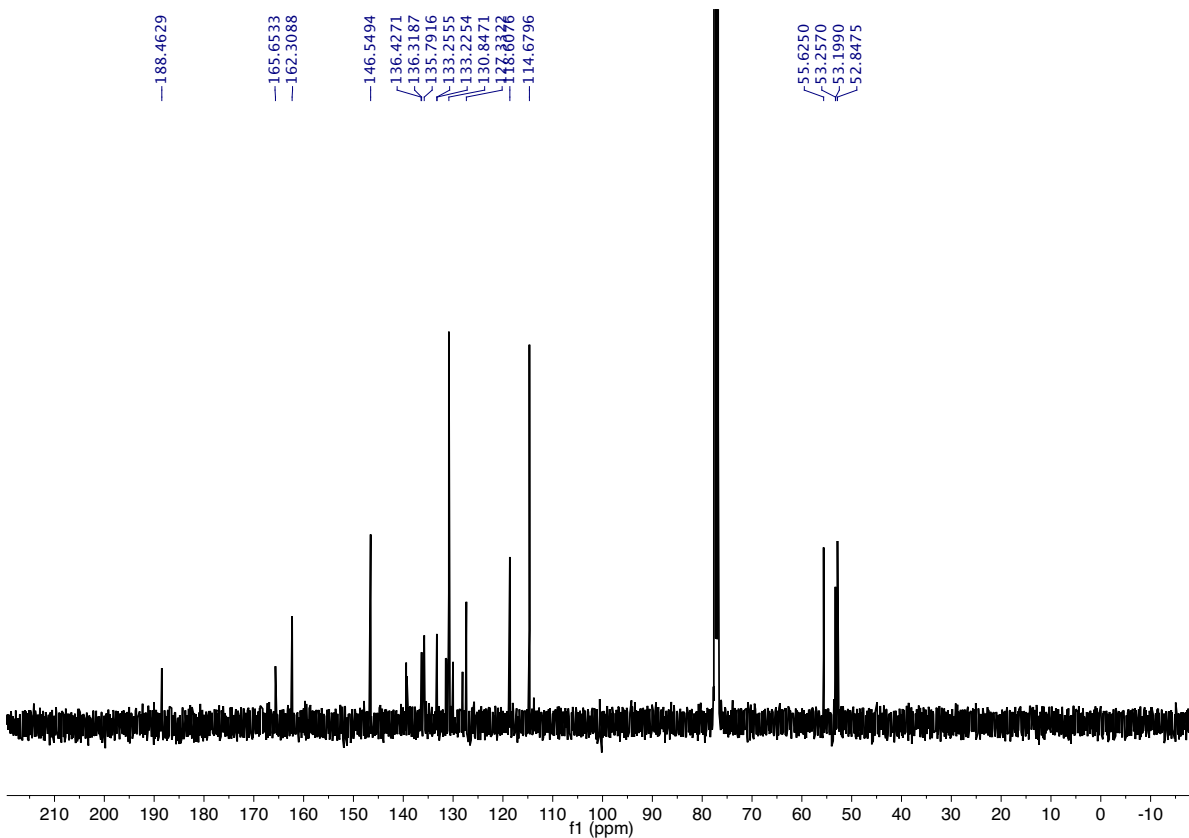

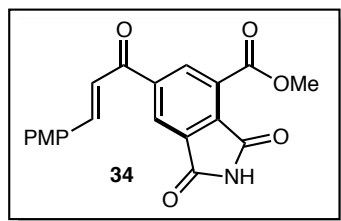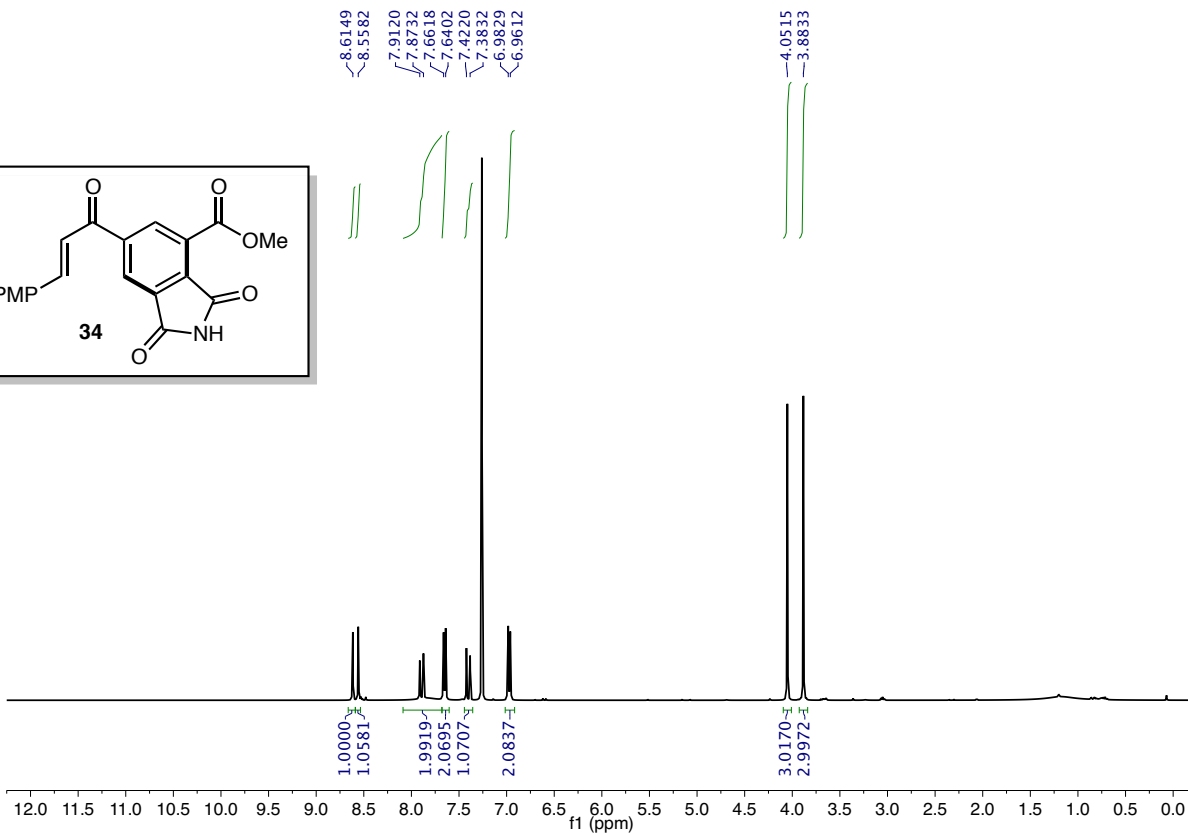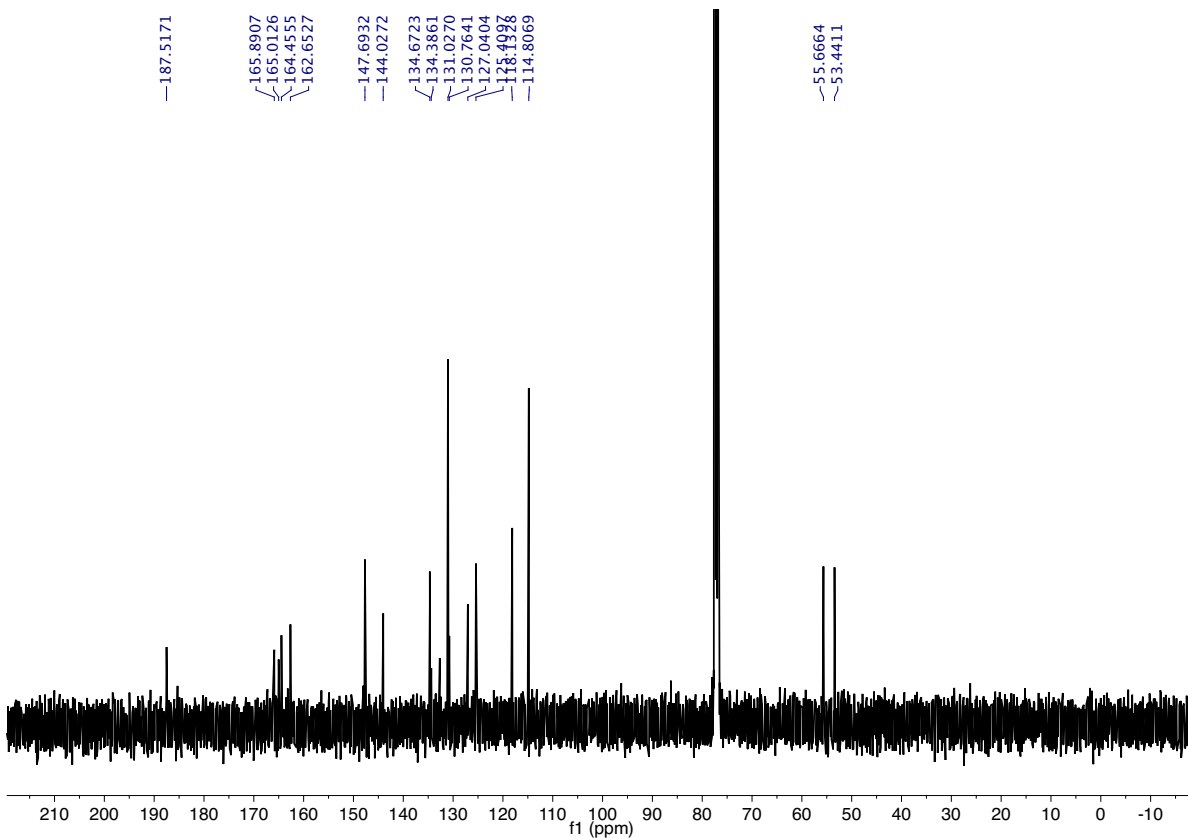

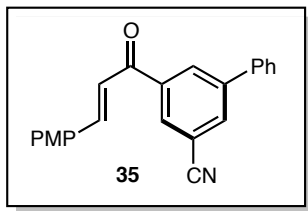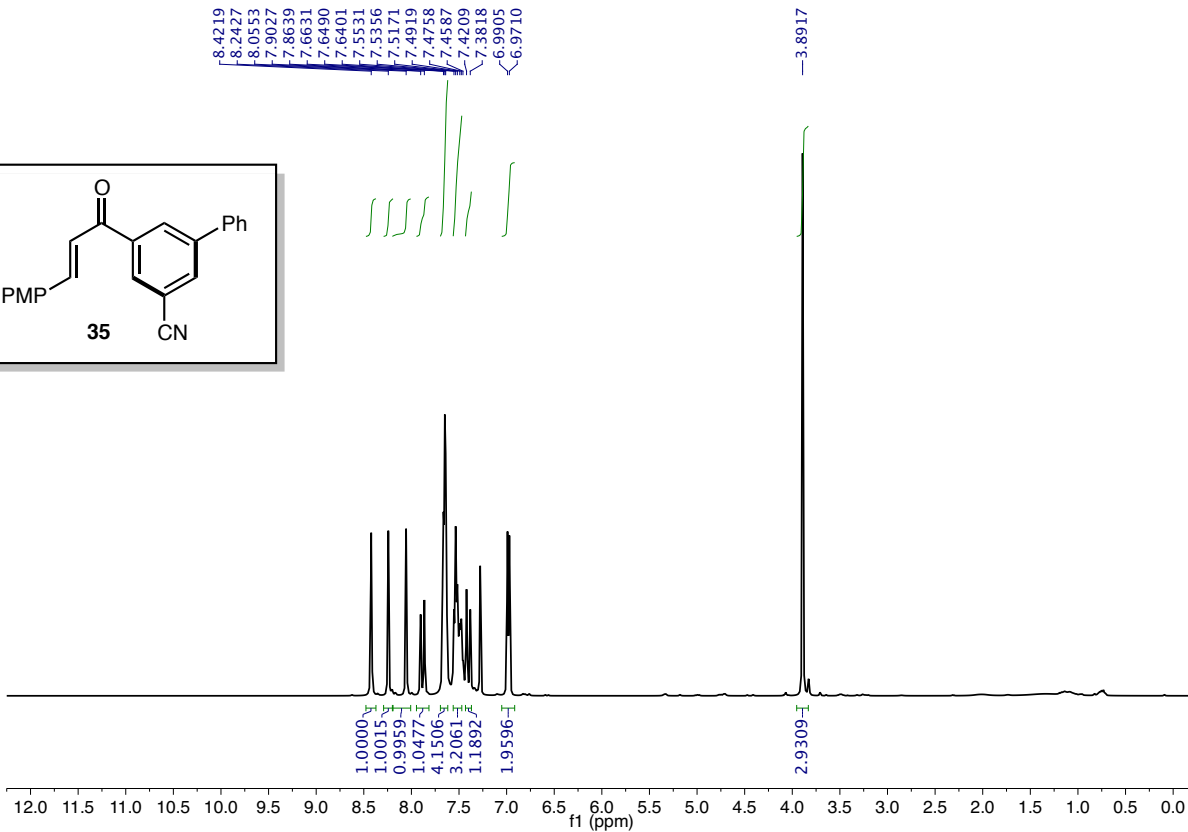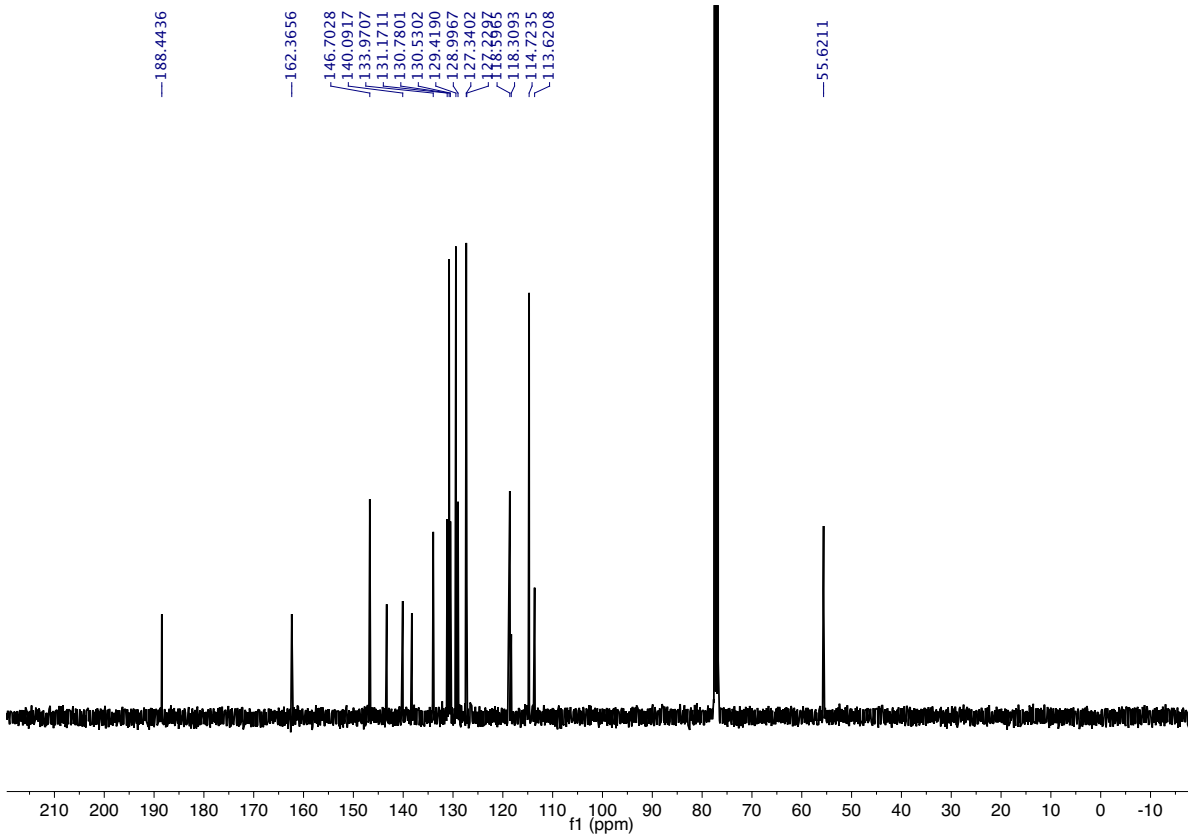

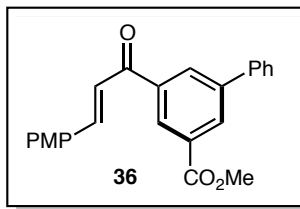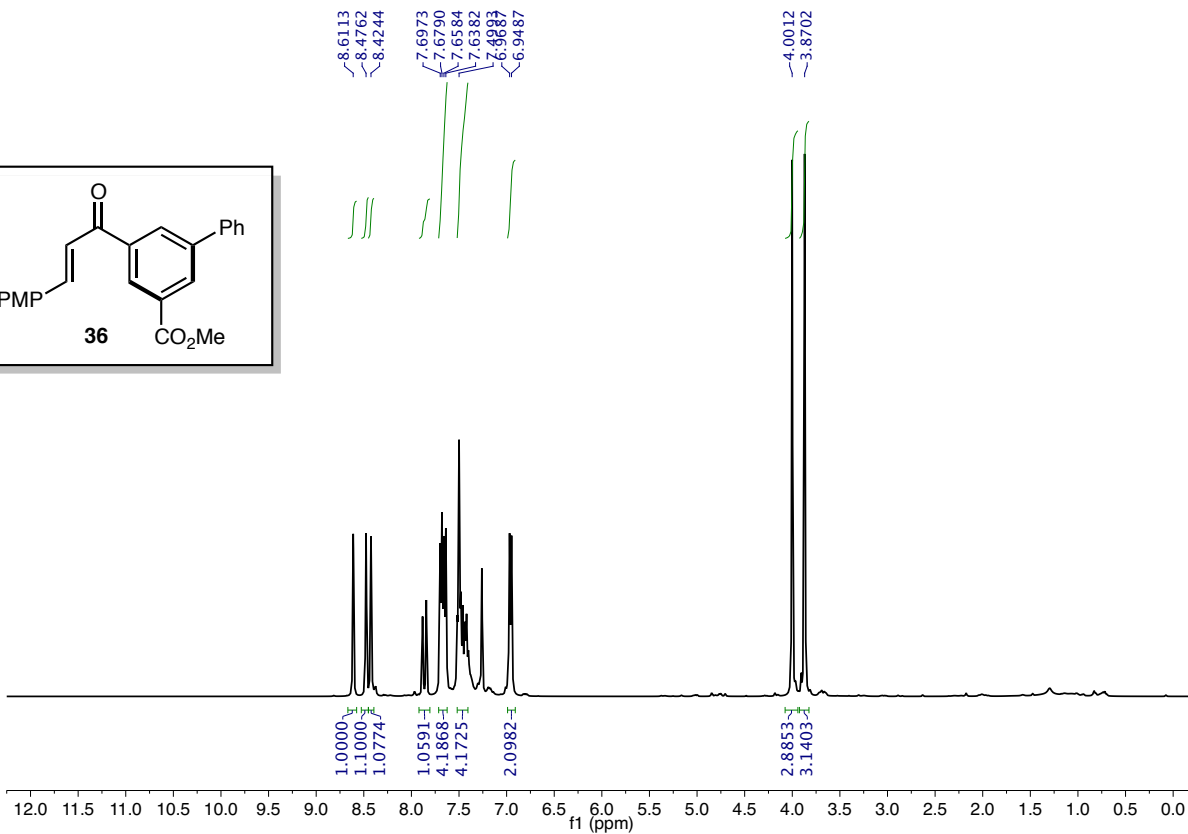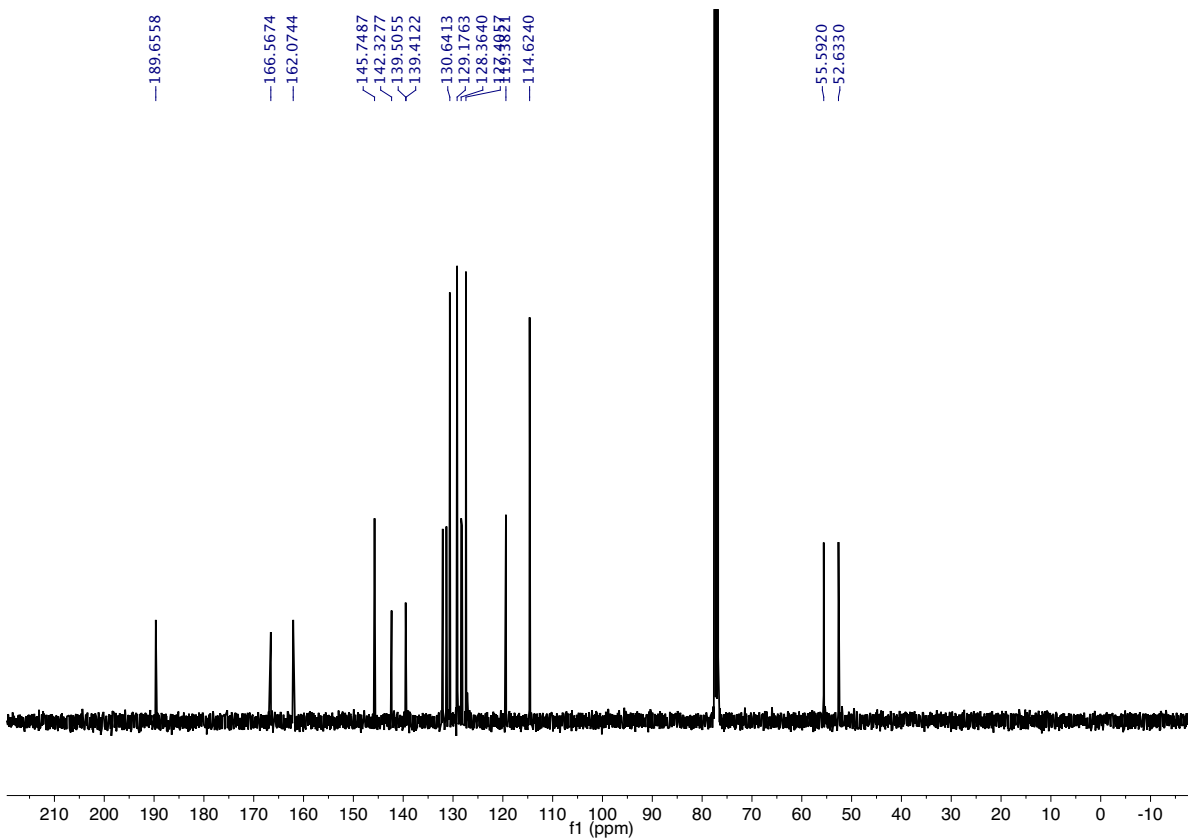

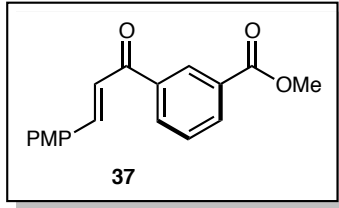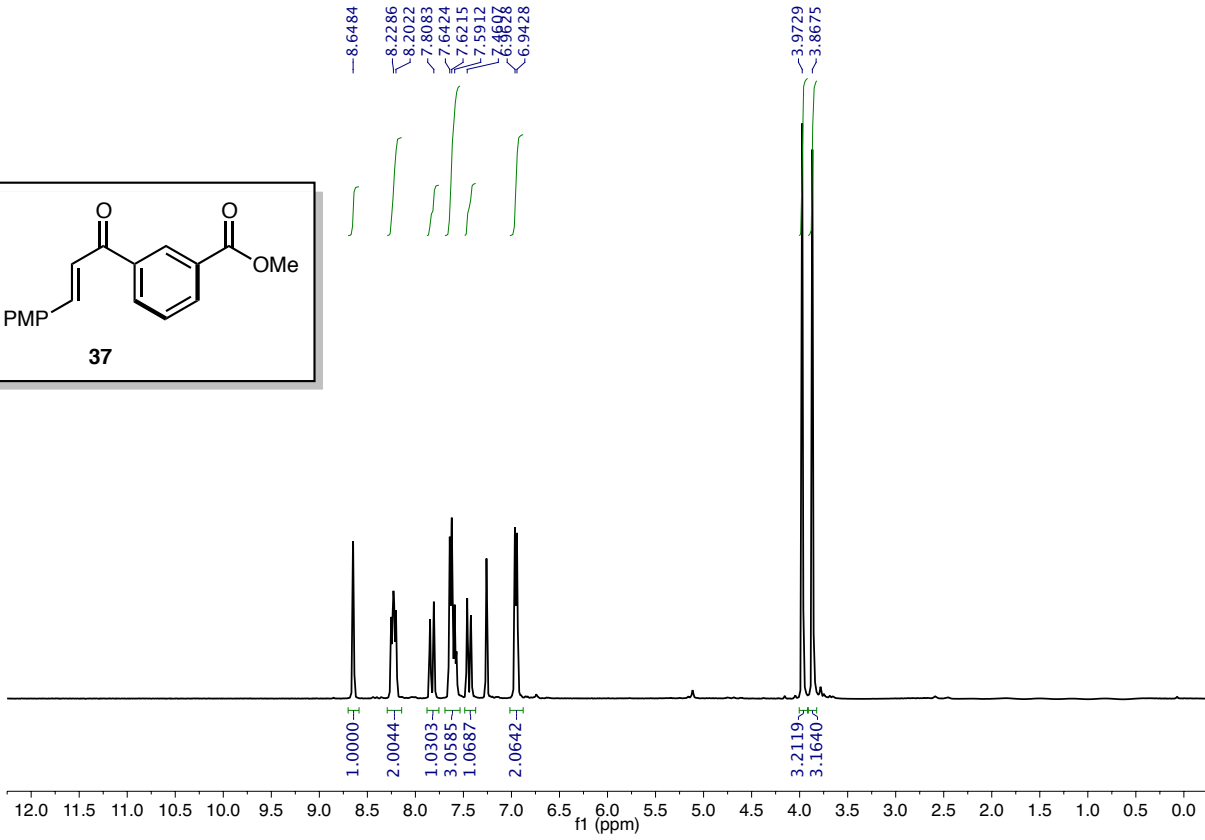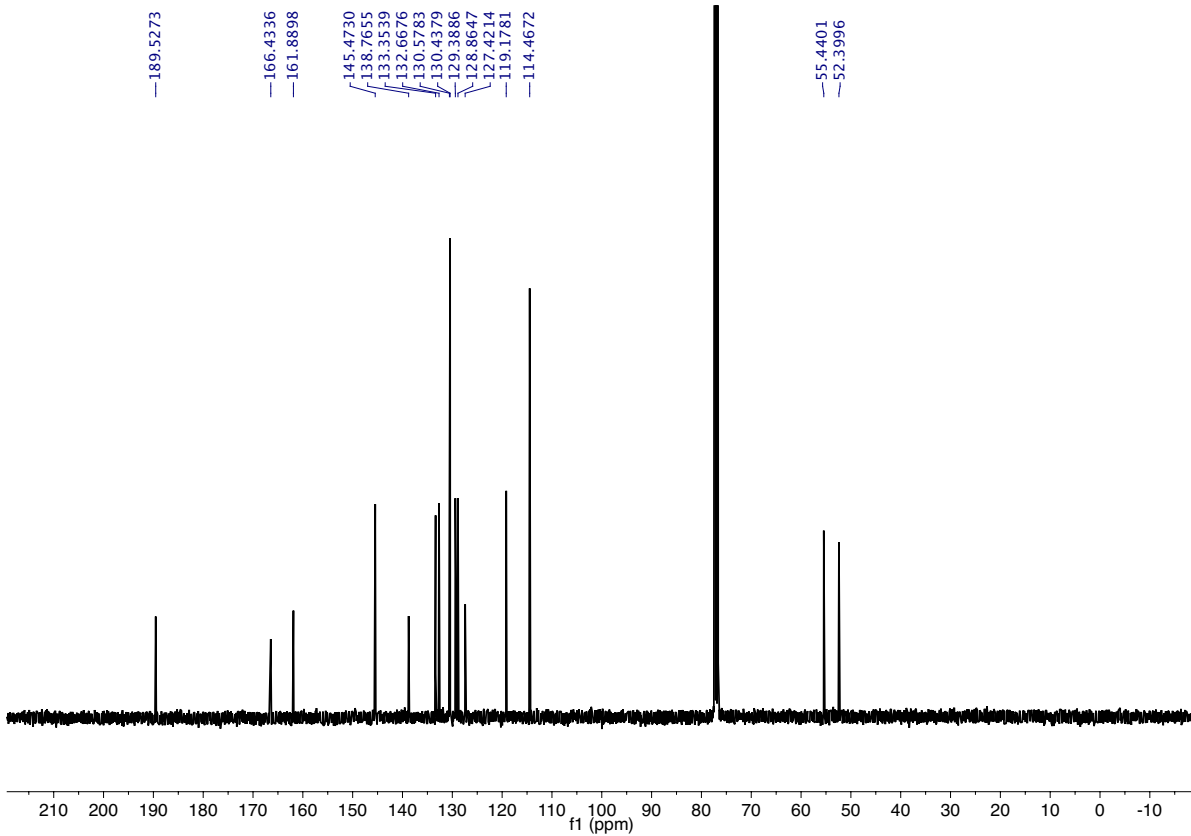

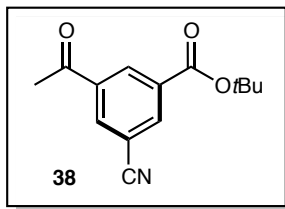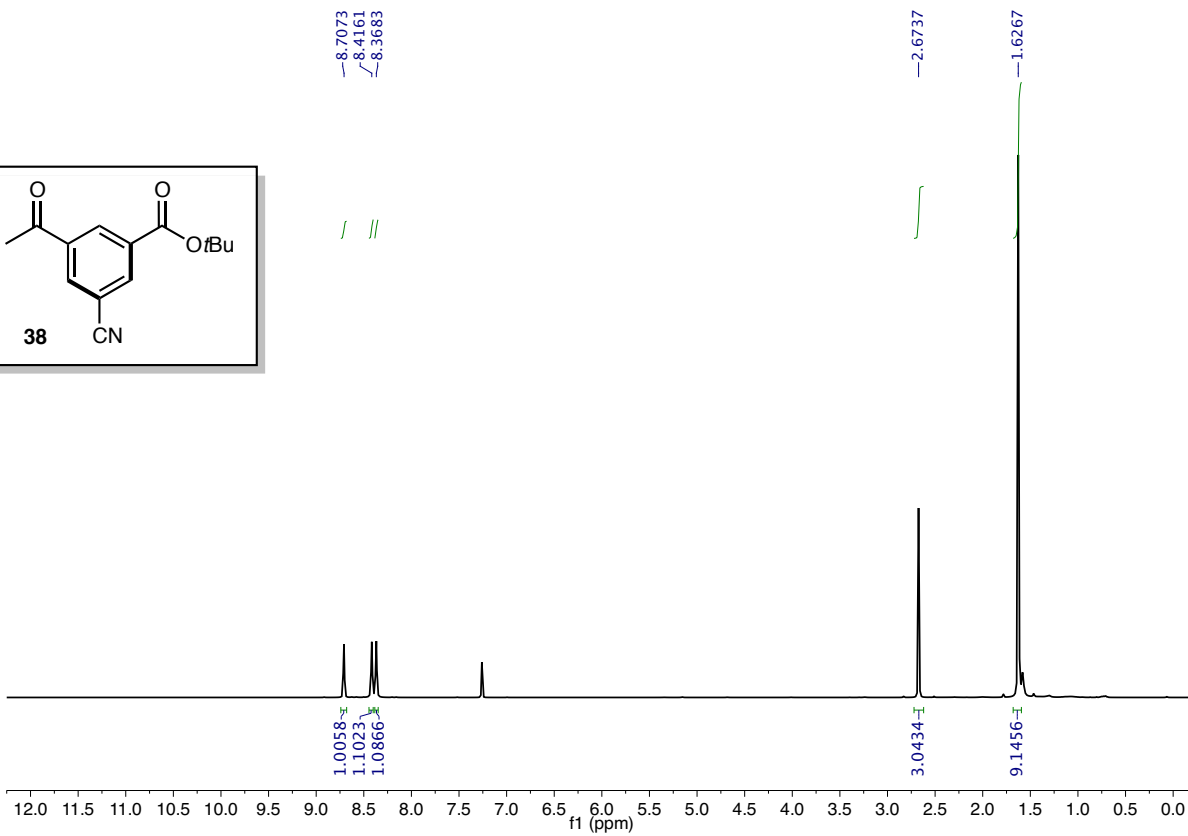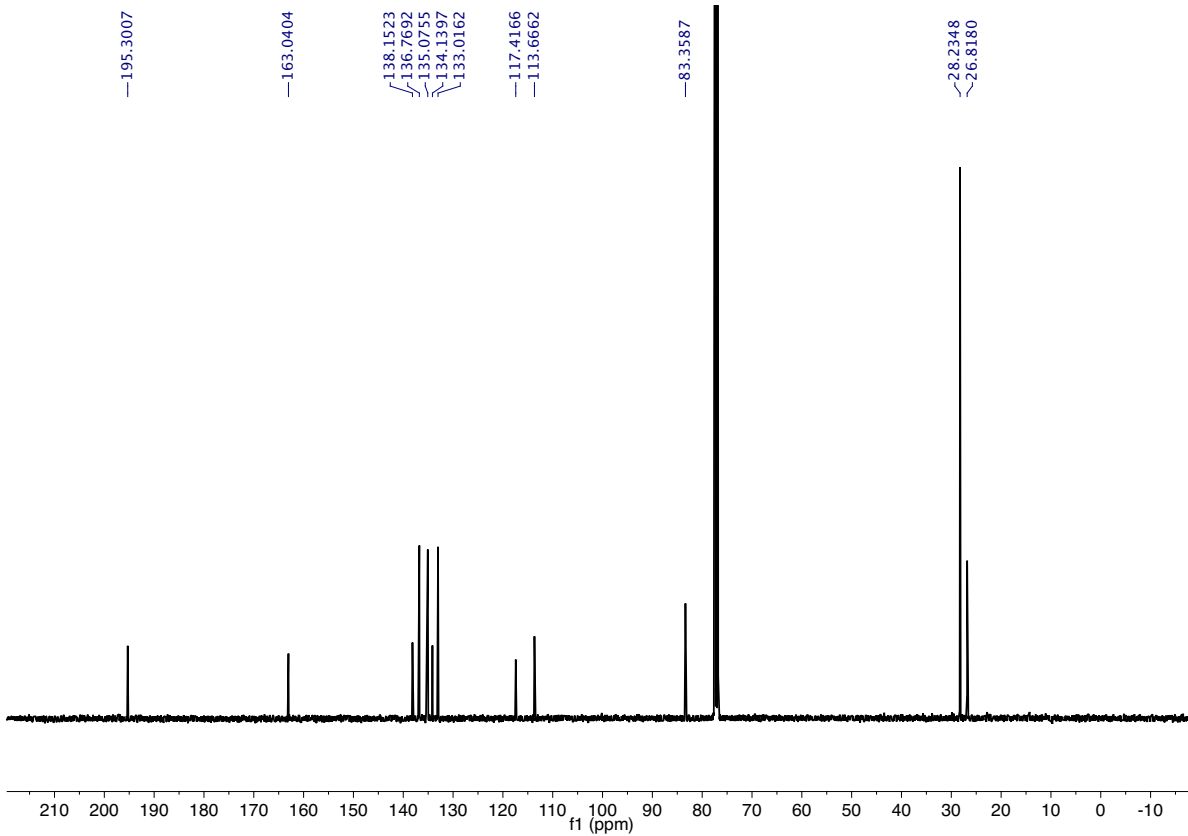

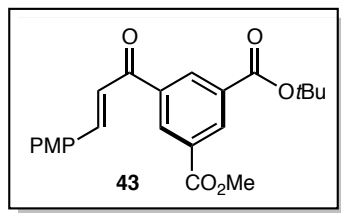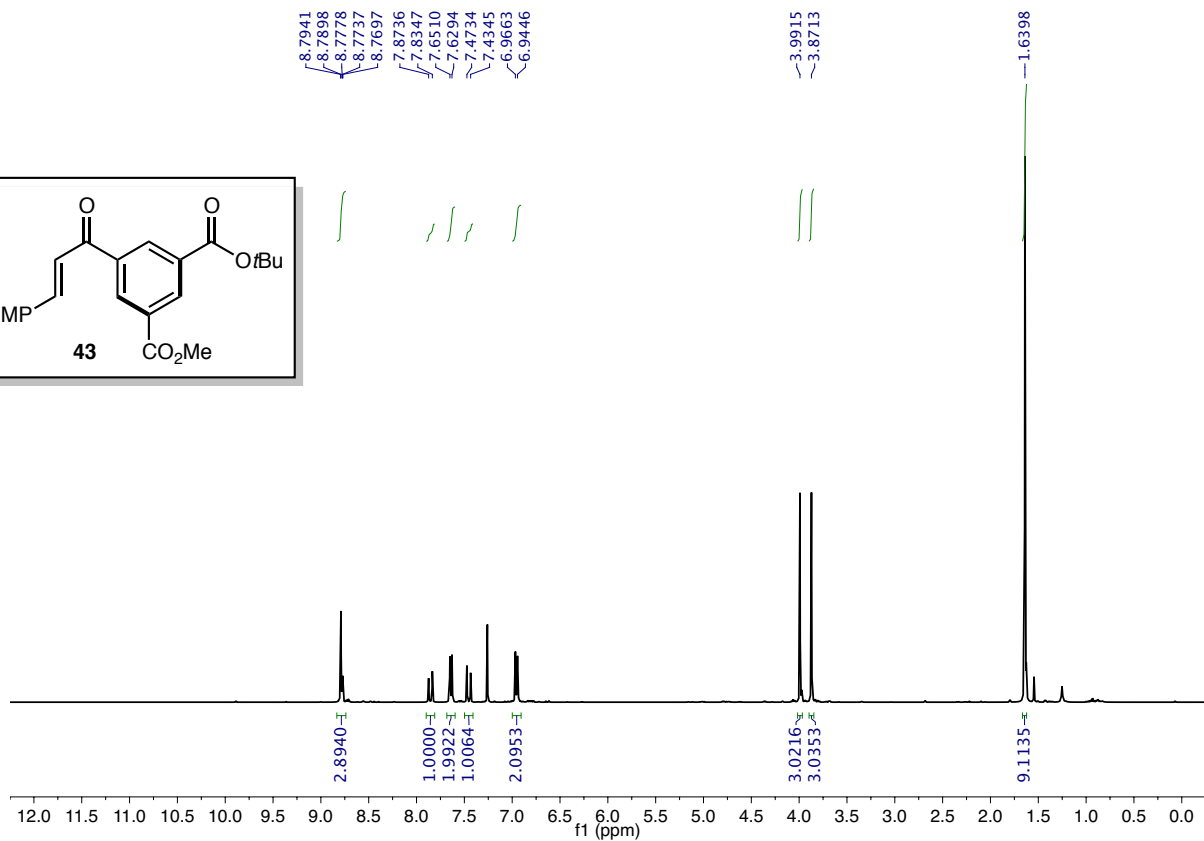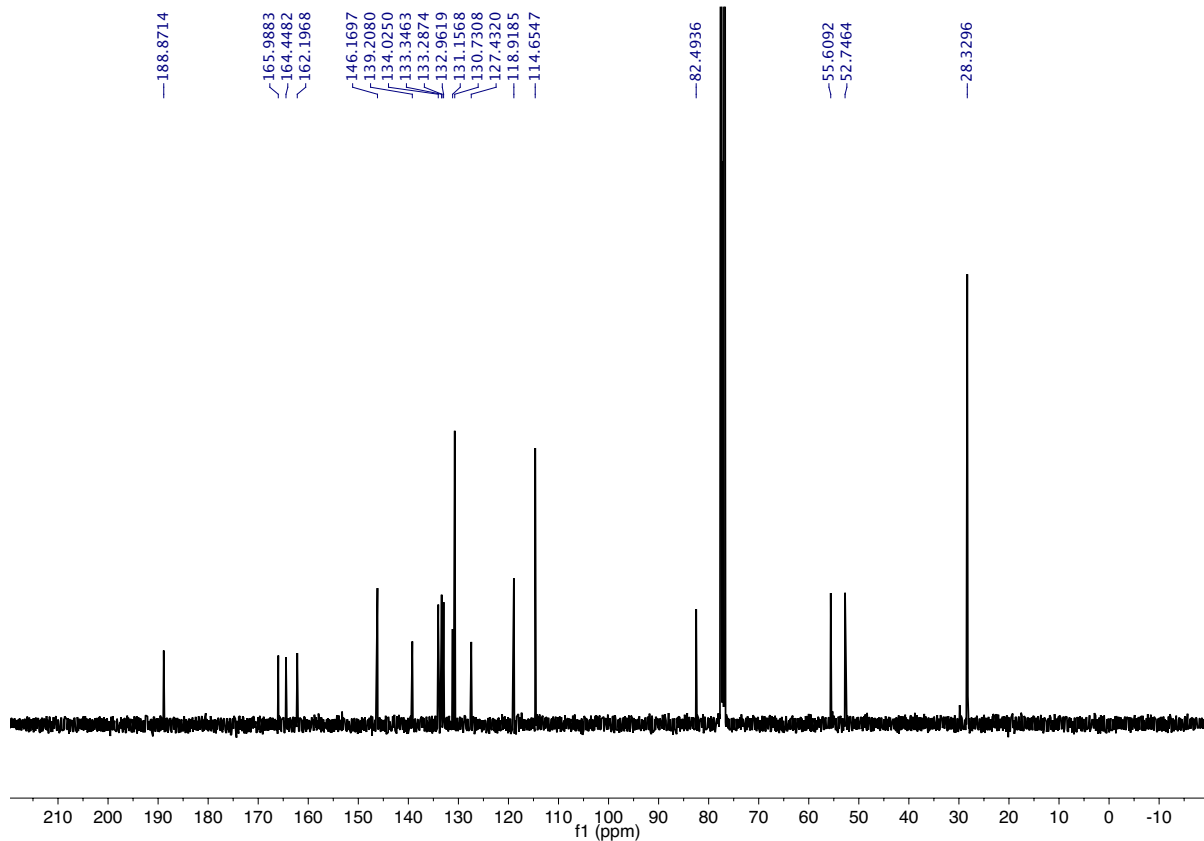

Supplement: NIHMS577374-supplement-Supporting_Information.pdf [file NIHMS577374-supplement-Supporting_Information.pdf]
